# Supplementary material for: Seasonal cycles and trends of water budget components in 18 river basins across Tibetan Plateau: a multiple datasets perspective
Source: Copernicus journal article supplement (doi:10.5194/hess-2016-624), 2016-11-25

1

2 **Seasonal cycles and trends of water budget components in 18**  
3 **river basins across the Tibetan Plateau: a multiple datasets**  
4 **perspective**

5

6 Wenbin Liu<sup>a</sup>, Fubao Sun<sup>a,b\*</sup>, Yanzhong Li<sup>a</sup>, Guoqing Zhang<sup>c,d</sup>, Yan-Fang Sang<sup>a</sup>,

7 Wee Ho Lim<sup>a,e</sup>, Jiahong Liu<sup>f</sup>, Hong Wang<sup>a</sup>, Peng Bai<sup>a</sup>

8

9 <sup>a</sup>Key Laboratory of Water Cycle and Related Land Surface Processes, Institute of Geographic  
10 Sciences and Natural Resources Research, Chinese Academy of Sciences, Beijing 100101, China

11 <sup>b</sup>Hexi University, Zhangye 734000, China

12 <sup>c</sup>Key Laboratory of Tibetan Environmental Changes and Land Surface Processes, Institute of  
13 Tibetan Plateau Research, Chinese Academy of Sciences, Beijing 100101, China

14 <sup>d</sup>CAS Center for Excellent in Tibetan Plateau Earth Sciences, Beijing 100101, China

15 <sup>e</sup>Environmental Change Institute, Oxford University Centre for the Environment, School of  
16 Geography and the Environment, University of Oxford, Oxford OX1 3QY, UK

17 <sup>f</sup>Key Laboratory of Simulation and Regulation of Water Cycle in River Basin, China Institute of  
18 Water Resources and Hydropower Research, Beijing 100038, China

19

20 **Submitted to:** Hydrology and Earth System Sciences

21 **Corresponding Author:** Dr. Fubao Sun ([Sunfb@igsnr.ac.cn](mailto:Sunfb@igsnr.ac.cn)), from the Key Laboratory of Water

22 Cycle and Related Land Surface Processes, Institute of Geographic Sciences and Natural

23 Resources Research, Chinese Academy of Sciences (No. A11, Datun Road, Chaoyang District,

24 Beijing 100101, China)

25 **Email Addresses for other authors:** Wenbin Liu ([liuwb@igsnr.ac.cn](mailto:liuwb@igsnr.ac.cn)), Yanzhong Li

26 ([liy.14b@igsnr.ac.cn](mailto:liy.14b@igsnr.ac.cn)), Guoqing Zhang ([guoqing.zhang@itpcas.ac.cn](mailto:guoqing.zhang@itpcas.ac.cn)), Yan-fang Sang

27 ([sangyf@igsnr.ac.cn](mailto:sangyf@igsnr.ac.cn)), Wee Ho Lim ([limwh@igsnr.ac.cn](mailto:limwh@igsnr.ac.cn)), Jiahong Liu ([liujh@iwhr.com](mailto:liujh@iwhr.com)), Hong

28 Wang ([wanghong@igsnr.ac.cn](mailto:wanghong@igsnr.ac.cn)), Peng Bai ([baip.11b@igsnr.ac.cn](mailto:baip.11b@igsnr.ac.cn))

29

30

2017/2/15

31 **Highlights**

- 32 ● A water balance approach to quantify monthly evapotranspiration which accounts  
33 for the changes in glacier and water storage of Tibetan Plateau
- 34 ● Evaluation of water budget components and trends for 18 river basin in Tibetan  
35 Plateau
- 36 ● Discussion of uncertainties arise from multiple datasets used in Tibetan Plateau

37

38 **Abstract.** The dynamics of water budget over the Tibetan Plateau (TP) are not well  
39 understood because of the lack of hydroclimatic observations. Based on multi-source  
40 datasets over a 30-year period (1982-2011), we investigate the seasonal cycles and  
41 trends of water budget components, e.g., precipitation (P), evapotranspiration (ET)  
42 and runoff (Q) of 18 river basins in TP. We apply a two-step bias-correction procedure  
43 to calculate the basin-scale ET considering the changes in glacier and water storage  
44 change. The results indicate that precipitation, which mainly concentrated during  
45 June-October (varied among different monsoons impacted basins), is the major  
46 contributor to the runoff in the TP basins. The basin-wide snow water equivalent  
47 (SWE) was relatively high from mid-autumn to spring for most of the river basins in  
48 TP. The water cycle intensified under global warming in most of these basins; receded  
49 in the upper Yellow and Yalong sub-river basins due to the weakening East Asian  
50 monsoon. Consistent with the warming climate and moistening in the TP and western  
51 China, the aridity index (PET/P) in most of the river basins decreased. These results  
52 demonstrate the usefulness of integrating the multi-source datasets (e.g., in situ  
53 observations, remote sensing products, reanalysis, land surface model simulations and  
54 climate model outputs) for hydrological applications in the data-sparse regions. More  
55 generally, such approach might offer helpful insights towards understanding the  
56 water/energy budgets and sustainability of water resource management practices of  
57 data-sparse regions in a changing environment.

58

## 59 **1 Introduction**

60 As the highest plateau in the globe (the average elevation is higher than 4000 meters

61 above the sea level), the Tibetan Plateau (TP, also called “the roof of the world” or  
62 “the third Pole”) is regarded as one of the most vulnerable region under a warming  
63 climate and is exposed to strong interactions among atmosphere, hydrosphere,  
64 biosphere and cryosphere in the earth system (Duan and Wu, 2006; Yao et al., 2012;  
65 Liu et al., 2016b). It serves as the “Asian water tower” from which some major Asian  
66 rivers such as Yellow River, Yangtze River, Brahmaputra River, Mekong River, Indus  
67 River, etc., originate. It is a vital water resource to support the livelihood of hundreds of  
68 millions of people in China and the neighboring Asian countries (Immerzeel et al.,  
69 2010; Zhang et al., 2013). Hence sound knowledge of water budget and hydrological  
70 regimes of TP and its response to changing environment would have practical  
71 relevance for achieving sustainable water resource management and environmental  
72 protection in this part of the world (Yang et al., 2014; Chen et al., 2015).

73

74 Despite the importance of TP in this geographic region, advance in hydrological and  
75 land surfaces studies in this region has been limited by data scarcity (Zhang et al.,  
76 2007; Li F. et al., 2013; Liu X. et al., 2016). For instance, less than 80 observation  
77 stations (~10% of a total of ~750 observation station across China) have been  
78 established in TP by the Chinese Meteorological Administration (CMA) since the  
79 mid-20<sup>th</sup> century (Wang and Zeng, 2012). These stations are generally sparse and  
80 unevenly distributed at relatively low elevation regions, focus only on the  
81 meteorological variables and lack of other land surface observations such as  
82 evapotranspiration, snow water equivalent and latent heat fluxes. In addition,  
83 long-term observations of river discharge, snow depth, lake depth and glacier melts in  
84 the TP are also absent (Akhta et al., 2009; Ma et al., 2016). Therefore, the water  
85 balance and hydrological regimes for each river basin of TP and their relation with

86 monsoons are poorly understood (Cuo et al., 2014; Xu et al., 2016). Whilst this  
87 shortcoming could be resolved through installation of in-situ monitoring systems  
88 (Yang et al., 2013; Zhou et al., 2013; Ma et al., 2015), the overall cost of running the  
89 operational sites would be substantial. Another workaround would be through  
90 modeling approach, i.e., feeding remote sensing information and meteorological  
91 forcing data into physically-based land surface model (LSM) to simulate the  
92 basin-wide water budget (Bookhagen and Burbank, 2010; Xue et al., 2013; Zhang et  
93 al., 2013; Cuo et al., 2015; Zhou et al., 2015; Wang et al., 2016). However, such  
94 approach is not immune from the issue of data scarcity at multiple river basins (with  
95 varied sizes and/or terrain complexities) for supporting model calibration and  
96 validation purposes (Li F. et al., 2014).

97

98 Most recently, several global (or regional) datasets relevant to the calculation of water  
99 budget have been released. They include remote sensing-based retrievals (Tapley et al.,  
100 2004; Zhang et al., 2010; Long et al., 2014; Zhang Y. et al., 2016), land surface model  
101 (LSM) simulations (Rui, 2011), reanalysis outputs (Berrisford et al., 2011; Kobayashi  
102 et al., 2015) and gridded forcing data interpolated from the in situ observations  
103 (Harris et al., 2014). For example, there are many products related to terrestrial  
104 evapotranspiration (ET) such as GLEAM\_E (Global Land surface Evaporation: the  
105 Amsterdam Methodology, Miralles et al., 2011a), MTE\_E (a product integrated the  
106 point-wise ET observation at FLUXNET sites with geospatial information extracted  
107 from surface meteorological observations and remote sensing in a machine-learning  
108 algorithm, Jung et al., 2010 ), LSM-simulated ETs from Global Land Data  
109 Assimilation System version 2 (GLDAS-2) with different land surface schemes  
110 (Rodell et al., 2004), ETs from Japanese 55-year reanalysis (JRA55\_E), the

111 ERA-Interim global atmospheric reanalysis dataset (ERA-Interim) and the National  
112 Aeronautic and Space Administration (NASA) Modern Era Retrospective-analysis  
113 for Research and Application (MERRA) reanalysis data (Lucchesi, 2012). Moreover,  
114 there are also several global or regional LSM-based runoff simulations from GLDAS  
115 and the Variable Infiltration Capacity (VIC) model (Zhang et al., 2014). A few  
116 attempts have been made to validate multiple datasets for certain water budget  
117 components and to explore their possible hydrological implications. For example, Li  
118 X. et al. (2014) and Liu et al. (2016a) evaluated multiple ET estimates against the  
119 water balance method at annual and monthly time scales. Bai et al. (2016) assessed  
120 streamflow simulations of GLDAS LSMs in five major rivers over the TP based on  
121 the discharge observations. Although uncertainties might exist among different  
122 datasets with various spatial and temporal resolutions and calculated using different  
123 algorithms (Xia et al., 2012), they offer an opportunity to examine the general  
124 basin-wide water budgets and their uncertainties in gauge-sparse regions such as the  
125 TP considered in this study.

126

127 From the multiple datasets perspective, this study aims to investigate the water budget  
128 in 18 TP river basins distributed across the Tibetan Plateau; and evaluate seasonal  
129 cycles and annual trends of these water budget components. This paper is organized  
130 as follows: the datasets and methods applied in this study are described in Sect.2. The  
131 results of season cycles and annual trends of water budget components for the river  
132 basins are presented and discussed in Sect.3. The uncertainties arise from employing  
133 multiple datasets are also discussed in the same section. In Sect.4, we generalize our  
134 findings which would be helpful for understanding the water balances of the river  
135 basins under constant influence of interplay between westerlies and monsoons (e.g.,

136 Indian monsoon, East Asian monsoon) in the Tibetan Plateau.

137

## 138 **2 Data and methods**

### 139 **2.1 Multiple datasets used**

#### 140 **2.1.1 Runoff, precipitation and terrestrial storage change**

141 We obtained the observed daily runoff (Q) of the study period from the National  
142 Hydrology Almanac of China (Table 1). There are < 30% missing data in some  
143 gauging stations such as Yajiang, Tongren, Gandatan and Zelingou. Therefore, the  
144 VIC Retrospective Land Surface Dataset over China (1952~2012, VIC\_IGSNRR  
145 simulated) with a spatial resolution of 0.25 degree and a daily temporal resolution  
146 from the Geographic Sciences and Natural Resources Research (IGSNRR), Chinese  
147 Academy of Sciences, is also used. This dataset is derived from the VIC model forced  
148 by the gridded daily observed forcing (IGSNRR\_forcing) (Zhang et al., 2014). A  
149 degree-day scheme was used in the model to account for the influences of snow and  
150 glacier on hydrological processes.

151

152 In terms of precipitation (P), we used the gridded monthly precipitation dataset  
153 available at CMA (spatial resolution of 0.5 degree; 1961-2011; interpolated from  
154 observations of 2372 national meteorological stations using the Thin Plate Spline  
155 method) (Table 1). Since the reliability of this dataset might be restricted by the  
156 relatively sparse stations and complex terrain conditions of TP, we make an attempt to  
157 incorporate two other precipitation datasets ((IGSNRR\_forcing and Tropical Rainfall  
158 Measuring Mission TRMM 3B43 V7). The precipitation from IGSNRR forcing  
159 datasets (0.25 degree) was derived by interpolating gauged daily precipitation from  
160 756 CMA stations based on the synergistic mapping system algorithm (Shepard,

161 1984; Zhang et al., 2014) and was further bias-corrected using the CMA gridded  
162 precipitation.

163 <Table 1, here please, thanks>

164 To get the change in terrestrial storage ( $\Delta S$ ), we used of three latest global terrestrial  
165 water storage anomaly and water storage change datasets (available on the GRACE  
166 Tellus website: <http://grace.jpl.nasa.gov/>) that were retrieved from the Gravity  
167 Recovery and Climate Experiment (GRACE, Tapley et al., 2004; Landerer and  
168 Swenson, 2012; Long et al., 2014). Briefly, they were processed separately at the Jet  
169 Propulsion Laboratory (JPL), the GeoForschungsZentrum (GFZ) and the Center for  
170 Space Research at the University of Texas (CSR). To minimize the errors and  
171 uncertainty of extracted  $\Delta S$ , we averaged these GRACE retrievals (2002-2013) from  
172 different processing centers in this study.

173

#### 174 **2.1.2 Temperature, potential evaporation and ET**

175 We obtained the monthly gridded temperature dataset (0.5 degree) from CMA; and  
176 potential evaporation (PET) dataset (0.5 degree, Harris et al., 2013) from Climatic  
177 Research Unit (CRU), University of East Anglia. Moreover, we used six global  
178 /regional ET products (four diagnostic products and two LSMs simulations, Table 2),  
179 namely (1) GLEAM\_E (Miralles et al., 2010, 2011), which consist of three sources of  
180 ET (transpiration, soil evaporation and interception) for bare soil, short vegetation and  
181 vegetation with a tall canopy calculated using a set of algorithm ([www.gleam.eu](http://www.gleam.eu)), (2)  
182 GNoah\_E simulated using GLDAS-2 with the Catchment Noah scheme  
183 (<http://disc.sci.gsfc.nasa.gov/hydrology/data-holdings>) (Rodell et al., 2004), (3)  
184 Zhang\_E (Zhang et al., 2010), which is estimated using the modified



185 Penman-Monteith equation forced with MODIS data, satellite-based vegetation  
186 parameters and meteorological observations (<http://www.ntsug.umt.edu/project/et>), (4)  
187 MET\_E (Jung et al., 2010) (<https://www.bgc-jena.mpg.de/geodb/projects/Home.phs>),  
188 (5) VIC\_E (Zhang et al., 2014) from VIC\_IGSNRR simulations  
189 ([http://hydro.igsnr.ac.cn/public/vic\\_outputs.html](http://hydro.igsnr.ac.cn/public/vic_outputs.html)) and (6) PML\_E (Zhang Y. et al.,  
190 2016) computed from global observation-driven Penman-Monteith-Leuning (PML)  
191 model (<https://data.csiro.au/dap/landingpage?pid=csiro:17375&v=2&d=true>).

192

### 193 **2.1.3 Vegetation and snow/glacier parameters**

194 To quantify the dynamics of vegetation of each river basin, we applied the  
195 Normalized Difference Vegetation Index (NDVI) and the Leaf Area Index (LAI)  
196 (Table 1). Briefly, the NDVI data was obtained from the Global Inventory Modeling  
197 and Mapping Studies (GIMMS) (Turker et al., 2005)  
198 ([https://nex.nasa.gov/nex/projects/1349/wiki/general\\_data\\_description\\_and\\_access/](https://nex.nasa.gov/nex/projects/1349/wiki/general_data_description_and_access/))  
199 while the LAI data was collected from the Global Land Surface Satellite (GLASS)  
200 products (<http://www.glcg.umd.edu/data/lai/>) (Liang and Xiao, 2012). Whist the  
201 change in seasonal snow cover and glacier has significant impact on the water and  
202 energy budgets of TP, it remains a technical challenge to get reliable observations due  
203 to harsh environment (especially at the basin scale). However, recently available  
204 satellite-based/LSM-simulated products might provide adequate characterization of  
205 the variation of snow cover and glacier. To quantify the change in snow cover at each  
206 basin, we applied the daily cloud free snow composite product from MODIS  
207 Terra-Aqua and the Interactive Multisensor Snow and Ice Mapping System for the  
208 Tibetan Plateau (Zhang et al., 2012; Yu et al., 2015), in conjunction with the snow

209 water equivalent (SWE) retrieved from Global Snow Monitoring for Climate  
210 Research product (GlobSnow-2, <http://www.globsnow.info/>) and the VIC\_IGSNRR  
211 simulations (Takala et al., 2011; Zhang et al., 2014). We extracted general distribution  
212 of glacier of TP from the Second Glacier Inventory Dataset of China (Guo et al.,  
213 2014). All gridded datasets used were first uniformly interpolated to a spatial  
214 resolution of 0.5 degree based on the bilinear interpolation to make their  
215 inter-comparison possible. The datasets were then extracted for each of TP basins.

216

#### 217 **2.1.4 Monsoon indices**

218 In general, the TP climate is under the influence of the westerlies, Indian summer  
219 monsoon and East Asian summer monsoon (Yao et al., 2012). To investigate the  
220 changes of monsoon systems and their potential impact on the water budget in the TP  
221 basins, we used three monsoon indices, namely Asian Zonal Circulation Index (AZCI),  
222 Indian Ocean Dipole Mode Index (IODMI) and East Asian Summer Monsoon Index  
223 (EASMI). Briefly, the IODMI is an indicator of the east-west temperature gradient  
224 across the tropical Indian Ocean (Saji et al., 1999), which can be downloaded from  
225 the following website:

226 <http://www.jamstec.go.jp/frcgc/research/d1/iod/HTML/Dipole%20Mode%20Index.ht>

227 [ml](http://www.jamstec.go.jp/frcgc/research/d1/iod/HTML/Dipole%20Mode%20Index.html). The EASMI and AZCI (60°-150°E) reflect the dynamics of East Asian summer  
228 monsoon (Li and Zeng, 2002) and the westerlies (represented by Asian Zonal  
229 Circulation index), which can be obtained from Beijing Normal University  
230 (<http://ljp.gcess.cn/dct/page/65577>) and the National Climate Center of China  
231 (<http://ncc.cma.gov.cn/Website/index.php?ChannelID=43WCHID=5>), respectively.

232

#### 233 **2.1.5 Study basins**

234 In this study, we selected 18 river basins of varied sizes (range: 2832-191235 km<sup>2</sup> ;  
235 see Table 1 for details) with adequate runoff data over a 30-year period (1982-2011).  
236 They are distributed in the northwestern, southeastern and eastern parts of the plateau  
237 with multiyear-mean and basin-averaged temperature and precipitation ranging from  
238 -5.68 to 0.97 °C and 128 to 717 mm, which are solely dominated or under the  
239 influences of the westerlies, the Indian Summer monsoon and the East Asian monsoon  
240 (Yao et al., 2012). There are more glacier and snow covers in the westerlies-dominant  
241 basins such as Yerqiang, Yulongkashi and Keliya (10.86~23.27% and 29.16~35.95%,  
242 respectively); less for the East Asian monsoon-dominated basins such as Yellow,  
243 Yangtze and Bayin (0~0.96% and 9.42~20.05%, respectively) (Table 2).

244 <Figure 1, here please, thanks>

245 <Table 2, here please, thanks>

246

## 247 **2.2 Methods**

### 248 **2.2.1 Water balance-based ET estimation**

249 The basin-wide water balance at the monthly and annual timescales could be written  
250 as the principle of mass conservation (also known as the continuity equation, Oliveira  
251 et al., 2014) of basin-wide precipitation (P, mm), evapotranspiration (ET<sub>wb</sub>, mm),  
252 runoff (Q, mm) as well as terrestrial water storage change ( $\Delta S$ , mm),

$$253 \quad ET_{wb} = P - Q - \Delta S \quad (1)$$

254 In most TP basins, glacier melt (M<sub>G</sub>, mm) contributes to river discharge together with  
255 precipitation (liquid precipitation and snow). The monthly and annual water balance  
256 in these basins can thus be revised as,

$$257 \quad ET_{wb} = P + M_G - Q - \Delta S \quad (2)$$

258 Several attempts have been made for separating glacier contributions to river

259 discharge through site-scale isotopic observations, remote sensing as well as  
260 land-surface hydrological modeling for some individual TP basins (Zhang et al., 2013;  
261 Zhou et al., 2014; Neckel et al., 2014; Xiang et al., 2016). However, accurate  
262 quantification of  $M_G$  is difficult in the data-sparse TP, especially for multiple basins.  
263 In this study, we simply use the percentages of glacier melt to river discharge for  
264 some TP basins derived from the literatures (Chen, 1988; Mansur and Ajinisa, 2005;  
265 Zhang et al., 2013; Liu J. et al., 2016) and the empirical relations between the glacier  
266 area ratio (%) and glacier melt in basins mentioned above (Table 3).

267 <Table 3, here please, thanks>

268 The terrestrial water storage ( $\Delta S$ ) in Eq. (2) includes the surface, subsurface and  
269 ground water changes. It has been demonstrated cannot be neglected in water balance  
270 calculation over monthly and annual timescales due to snow cover change and  
271 anthropogenic interferences (e.g., reservoir operation, agricultural water withdrawal)  
272 (Liu et al., 2016a). For the period 2002-2011, we calculated basin-wide ET ( $ET_{wb}$ )  
273 directly using the GRACE-derived  $\Delta S$  in Eq. (2). Since GRACE data is absent  
274 before 2002, we calculated the monthly  $ET_{wb}$  using the following two-step  
275 bias-correction procedure (Li X. et al., 2014). We defined  $P + M_G - Q$  in Eq. (2) as  
276 biased ET ( $ET_{biased}$ , available from 1982 to 2011) relative to the “true” ET  
277 ( $ET_{wb} = P + M_G - Q - \Delta S$ , available during the period 2002-2011 when the GRACE  
278 data is available). Over the period 2002-2011, we first fitted  $ET_{biased}$  and  $ET_{wb}$   
279 series separately using different gamma distributions, which has been evidenced as an  
280 proper method for modeling the probability distribution of ET (Bouraoui et al., 1999).  
281 The monthly  $ET_{biased}$  series (2002-2011) can then be bias-corrected through the  
282 inverse function ( $F^{-1}$ ) of the gamma cumulative distribution function (CDF,  $F$ ) of  
283  $ET_{wb}$  by matching the cumulative probabilities between two CDFs as follow (Liu et

284 al., 2016a),

$$285 \quad ET_{\text{corrected}}(m) = F^{-1}(F(ET_{\text{biased}}(m)|\alpha_{\text{biased}}, \beta_{\text{biased}})|\alpha_{\text{wb}}, \beta_{\text{wb}}) \quad (3)$$

286 Here  $\alpha_{\text{biased}}, \beta_{\text{biased}}$  and  $\alpha_{\text{wb}}, \beta_{\text{wb}}$  are shape and scale parameters of  
287 gamma distributions for  $ET_{\text{biased}}$  and  $ET_{\text{wb}}$ .  $ET_{\text{corrected}}(m)$  and  $ET_{\text{biased}}(m)$   
288 represent the monthly corrected and biased ET, respectively. The bias correction  
289 procedure can be flexibly applied to the period 1983-2011 by matching the CDF  
290 of  $ET_{\text{biased}}$  (1983-2011) to that of  $ET_{\text{corrected}}$  (2002-2011). The second step of  
291 bias correction is to eliminate the annual bias through the ratio of annual  
292  $ET_{\text{biased}}$  to annual  $ET_{\text{corrected}}$  calculated in the first step using the following  
293 method,

$$294 \quad ET_{\text{final}}(m) = \frac{ET_{\text{biased}}(a)}{ET_{\text{corrected}}(a)} \times ET_{\text{corrected}}(m) \quad (4)$$

295 where  $ET_{\text{final}}(m)$  is the final monthly ET after bias correction.  $ET_{\text{biased}}(a)$  and  
296  $ET_{\text{corrected}}(a)$  represent the annual biased and corrected ET while  
297  $ET_{\text{corrected}}(m)$  is the monthly corrected ET obtained from the first step. The  
298 procedure was then applied to correct the monthly  $ET_{\text{biased}}$  series and  
299 calculated the monthly  $ET_{\text{corrected}}$  during the period 1982-2001 for all TP  
300 basins. We take these results as sufficient representation of the “true” ET ( $ET_{\text{wb}}$ )  
301 for evaluating multiple ET products and trend analysis.”

302

### 303 **2.2.2 Modified Mann-Kendall test method**

304 The Mann-Kendall (MK) test is a rank-based nonparametric approach which is less  
305 sensitive to outlier relative to other parametric statistics, but it is sometimes  
306 influenced by the serial correlation of time series. Pre-whitening is often used to  
307 eliminate the influence of lag-1 autocorrelation before the use of MK test. For

308 example,  $X = (X_1, X_2, \dots, X_n)$  is a time series data, it will be replaced by  $(X_2 -$   
309  $cX_1, X_3 - cX_2, \dots, X_{n+1} - cX_n)$  in pre-whitening if the lag-1 autocorrelation  
310 coefficient ( $c$ ) is larger than 0.1 (von Storch, 1995). However, significant lag- $i$   
311 autocorrelation may still be detected after pre-whitening because only the lag-1  
312 autocorrelation is considered in pre-whitening (Zhang et al., 2013). Moreover, it  
313 sometimes underestimate the trend for a given time series (Yue et al., 2002). Hamed  
314 and Rao (1998) proposed a modified version of MK test (MMK) to consider the lag- $i$   
315 autocorrelation and related robustness of the autocorrelation through the use of  
316 equivalent sample size, which has been widely used in previous studies during the last  
317 five decades (McVicar et al., 2012; Zhang et al., 2013; Liu and Sun, 2016). In the  
318 MMK approach, if the lag- $i$  autocorrelation coefficients are significantly distinct from  
319 zero, the original variance of MK statistics will be replaced by the modified one. In  
320 this study, we used the MMK approach to quantify the trends of water budget  
321 components in 18 TP basins and the significance of trend was tested at the >95%  
322 confidence level.

### 323 **3 Results and Discussion**

#### 324 **3.1 ET evaluation and General hydrological characteristics of 18 TP basins**

325 We first assessed the VIC\_IGSNRR simulated runoff against the observations for  
326 each basin (for example, at Tangnaihaid and Pangduo stations in Fig.2). If the Nash  
327 Efficiency coefficient (NSE) between the observation and simulation is above 0.65,  
328 the VIC\_IGSNRR simulated runoff is acceptable and could be used to replace the  
329 missing values for a given basin. Moreover, the CMA precipitation is consistent with  
330 TRMM (Corr = 0.86, RMSE = 8.34 mm/month) and IGSNRR forcing (Corr = 0.94,  
331 RMSE = 7.15mm/month) precipitation for multiple basins (and also for the smallest  
332 basin above Tongren station, Fig.2), although the observation-derived and

333 TRMM-estimated precipitation also has uncertainties. The magnitudes of  
334 GRACE-derived annual mean water storage change ( $\Delta S$ ) in 18 TP basins are  
335 relatively less than those for other water balance components such as annual P, Q and  
336 ET (Table 4). The uncertainties among GRACE-derived annual mean  $\Delta S$  from  
337 different data processing centers (CSR, GFZ and JPL) are small for 18 basins except  
338 for in the basins controlled by Gadatan and Tangnaihahai stations.

339 [< Figure 2, here please, thanks >](#)

340 [< Table 4, here please, thanks >](#)

341 We then evaluated six ET products in 18 TP basins against our calculated  $ET_{wb}$  at a  
342 monthly basis during the period 1983-2006 (Fig. 3). The ranges of monthly averaged  
343 ET among different basins (approximately 4–39 mm month<sup>-1</sup>) are very close for all  
344 products compare to that calculated from the  $ET_{wb}$  (6–42 mm month<sup>-1</sup>). However,  
345 GLEAM\_E (correlation coefficient: Corr = 0.85 and root-mean-square-error: RMSE =  
346 5.69 mm month<sup>-1</sup>) and VIC\_E (Corr = 0.82 and RMSE = 6.16 mm month<sup>-1</sup>) perform  
347 relatively better than others. Although Zhang\_E and GNoah\_E were found closely  
348 correlated to monthly  $ET_{wb}$  in the upper Yellow River, the upper Yangtze River,  
349 Qiangtang and Qaidam basins (Li X. et al., 2014), they did not exhibit overall good  
350 performances (Corr = 0.61, RMSE = 7.97 mm month<sup>-1</sup> for Zhang\_E and Corr = 0.42,  
351 RMSE = 10.16 mm month<sup>-1</sup> for GNoah\_E) for 18 TP basin used in this study. We thus  
352 use GLEAM\_E and VIC\_E together with  $ET_{wb}$  to calculate the seasonal cycles and  
353 trends of ET in 18 TP basins in the following sections.

354 [< Figure 3, here please, thanks >](#)

355 To investigate the general hydroclimatic characteristics of rivers over the TP, we  
356 classify 18 basins into three categories, namely westerlies-dominated basins  
357 (Yerqiang, Yulongkashi and Kelia), Indian monsoon-dominated basins (Brahmaputra

358 and Salween), and East Asian monsoon-dominated basins (Yellow, Yalong and  
359 Yangtze) referred to Tian et al. (2007), Yao et al. (2012) and Dong et al. (2016).  
360 Interestingly, they are clustered into three groups under Budyko framework (Budyko,  
361 1974; Zhang D. et al., 2016) with relatively lower evaporative index in Indian  
362 monsoon-dominant basins and higher aridity index in westerlies-dominant basins,  
363 which reveal various long-term hydroclimatologic conditions (Fig. 4). Overall, the  
364 annual mean air temperature increases (-5.68 ~0.97 °C) while multiyear mean glacier  
365 area (and thus the glacier melt normalized by precipitation) decreases (23.27 ~ 0%)  
366 gradually from the westerlies-dominant, Indian monsoon-dominant to East Asian  
367 monsoon-dominant basins. The vegetation status (NDVI range: 0.05~0.43; LAI range:  
368 0.03~0.83) tends to be better and ET increases (and thus runoff coefficient gradually  
369 decreases) from cold to warm basins (Fig. 4 and Table 1). The  $R^2$  between  
370 basin-averaged NDVI and ET is 0.76 which shows a clear vegetation control on ET in  
371 18 TP basins. The results are in line with Shen et al. (2015), which indicated that the  
372 spatial pattern of ET trend was significantly and positively correlated with NDVI  
373 trend over the TP. The dominant climate systems are overall discrepant for the three  
374 TP regions with different water-energy characteristics and sources of water vapor. The  
375 westerlies-controlled basins are relatively colder than the Indian monsoon-dominated  
376 basins, thus they develop more glaciers (and thus have more snow melt contributions  
377 to total river streamflow) and have relatively less vegetation (and thus limit vegetation  
378 transpiration). It is a general picture of hydrological regime in high-altitude and cold  
379 regions (Zhang et al., 2013; Cuo et al., 2014), which could be interpreted from the  
380 perspective of multi-source datasets in the data-sparse TP.

381 < [Figure 4, here please, thanks](#) >

### 382 **3.2 Seasonal cycles of basin-wide water budget components for the TP basins**



383 The multi-year means of water budget components (i.e., P, Q, ET, snow cover and  
384 SWE) and vegetation parameters (i.e., NDVI and LAI) are calculated for each  
385 calendar month and for 18 TP river basins using multi-source datasets available from  
386 1982 to 2011. Overall, the seasonal variations of P, Q, ET, air temperature and  
387 vegetation parameters are similar in all TP basins with peak values occurred in May to  
388 September (Fig.5 and Fig.6). The seasonal cycles of snow cover and SWE are  
389 generally consistent among the basins (the peak values mainly occur from October to  
390 next April, Fig.7). With the ascending air temperature from cold to warm months, the  
391 basin-wide precipitation increases and vegetation cover expands gradually (the  
392 basin-wide ET also increase). Meanwhile, snow cover and glaciers retreat gradually  
393 with the melt water supplying the river discharge together with precipitation. The  
394 inter-basin variations of hydrological regime are to a large extent linked to the climate  
395 systems that prevail over the TP.

396 [< Figure 5, here please, thanks >](#)

397 Although the temporal patterns of hydrological components are generally analogous,  
398 they vary among the parameters, climate zones and even basins (Zhou et al., 2005).  
399 For example, relative to air temperature, the seasonal pattern of runoff is similar to  
400 precipitation which reveals that runoff is mainly controlled by precipitation in most  
401 TP basins. It is in agreement with that summarized by Cuo et al. (2014). In the  
402 westerlies-dominated basins, the peak values of precipitation and runoff mainly  
403 concentrate in June-August, which contribute approximately 68-82% and 67-78% of  
404 annual totals, respectively. During this period, the runoff always exceeds precipitation  
405 which indicates large contributions of glacier/snow-melt water to streamflow. It is  
406 consistent with the existing findings in Tarim River (Yerqiang, Yulongkashi and  
407 Keliya rivers are the major tributaries of Tarim River), which indicated that the melt

408 water accounted for about half of the annual total streamflow (Fu et al., 2008). The  
409 ET (vegetation cover) in three westerlies-dominated basins are relatively less (scarcer)  
410 than that in other TP basins while the percentages of glacier and seasonal snow cover  
411 are higher in these basins which contribute more melt water to river discharge (Fig.6  
412 and Fig.7). Overall, the SWE in Yerqiang, Yulongkashi and Keliya rivers are higher in  
413 winter than other seasons, but they vary with basins and products which reflect  
414 considerable uncertainties in SWE estimations.

415 [< Figure 6, here please, thanks >](#)

416 In the Indian monsoon and East Asian monsoon-dominated basins, the runoff  
417 concentrates during June-September (or June- October) with precipitation being the  
418 dominant contributor of annual total runoff. For example, the peak values of  
419 precipitation and runoff occur during June-September at Zhimenda station  
420 (contributing about 80% and 74% of the annual totals) while those occur during  
421 June-October at Tangnaihai station (contributing about 78% and 71% of the annual  
422 totals, respectively). The results are quite similar to the related studies in eastern and  
423 southern TP such as Liu (1999), Dong et al. (2007), Zhu et al. (2011), Zhang et al.  
424 (2013), Cuo et al. (2014). The vegetation cover (ET) in most basins is denser (higher)  
425 than that in the westerlies-dominant basins. Moreover, the seasonal snow mainly  
426 covers from mid-autumn to spring and correspondingly the SWE is relatively higher  
427 in these months in all basins except for Yellow River above Xining station, Salwee  
428 River above Jiayuqiao station and Brahmaputra River above Nuxia and Yangcun  
429 stations.

430 [< Figure 7, here please, thanks >](#)

### 431 **3.3 Trends of basin-wide water budget components for the TP basins**

432 The hydrological cycle has intensified in the westerlies-dominated basins with Q, P

433 and  $ET_{wb}$  all ascended under regional warming (Fig.8), especially in the Keliya  
434 River basin (Numaitilangan station). The aridity index (PET/P), which is an indicator  
435 for the degree of dryness, slightly declined in all basins in northwestern TP. Although  
436 both P and PET were found increase since the 1980s (Shi et al., 2003; Yao et al.,  
437 2014), the declined PET/P is, to some extent, attributed to the ascending P exceed the  
438 increase in PET in these basins (except for the Yulongkashi basin). The climate  
439 moistening (Shi et al., 2003) in the headwaters of these inland rivers would be  
440 beneficial to the water resources and oasis agro-ecosystems in the middle and lower  
441 basins. The increase in streamflow was also found in most tributaries of the Tarim  
442 River (Sun et al., 2006; Fu et al., 2010; Mamat et al., 2010).

443

444 Moreover, the westerlies, revealed by the Asian Zonal Circulation Index ( $60^{\circ}$ - $150^{\circ}$  E),  
445 slightly enhanced (linear trend: 0.21) over the period 1982-2011 (Fig.9). With the  
446 strengthening westerlies, more water vapor may be transported and fell as  
447 precipitation or snow in northwestern TP (e.g., the eastern Pamir region). Both SWE  
448 products (VIC\_IGSNRR simulated and GlobaSnow-2 product) showed slight increase  
449 across all basins with rising seasonal snow covers and glaciers (Yao et al., 2012).  
450 More precipitation was transformed into snow or glacier and the runoff coefficient  
451 (Q/P) exhibited decrease although precipitation obviously increased (Fig.8). In  
452 addition, the transpiration in these basins might decrease with vegetation degradation  
453 as revealed by the NDVI and LAI (Yin et al., 2016) but the atmospheric evaporative  
454 demand indicated by CRU PET increased (significantly increase in the Yulongkashi  
455 and Keliya rivers) during the period 1982-2011.

456 < [Figure 8, here please, thanks](#)>

457 < [Figure 9, here please, thanks](#)>

458 In the East Asian monsoon-dominated basins, there are two types of change for  
459 basin-wide water budget components. For example, P and Q slightly decreased in the  
460 upper Yellow River (Tangnihai, Huangheyuan and Jimai stations) and Yalong River  
461 (Yajiang station) but increased in other basins (Zelingou, Gandatan, Xining, Tongren  
462 and Zhimenda stations) over the period of 1982-2011 (Fig.10). The decline in Q and P  
463 for the upper Yellow and Yalong Rivers (locate at the eastern Tibetan Plateau) were  
464 consistent with that found by Cuo et al. (2013, 2014) as well as Yang et al. (2014), and  
465 were in line with the weakening (linear slope: -0.01) of the East Asian Summer  
466 Monsoon (Fig.9). The vegetation turned green while  $ET_{wb}$  and PET increased in all  
467 nine basins with the significantly ascending air temperature during the period  
468 1982-2011. The aridity index (PET/P) decreased in all basins except for the upper  
469 Yellow River basin above Jimai station and the upper Yalong River basin above  
470 Yajiang station. Moreover, both the runoff coefficients and SWE decreased except for  
471 the Bayin River above Zelingou station and the upper Yellow River above Tongren  
472 station in the East Asian monsoon dominated basins.

473 < Figure 10, here please, thanks >

474 The hydrological cycle intensified in the Indian monsoon-dominated basins such as  
475 Salween River and Brahmaputra River (Fig.11), in line with the strengthening (linear  
476 trend: 0.01) of the Indian summer monsoon (revealed by the Indian Ocean Dipole  
477 Mode Index) during the specific period 1982-2011 (Fig.9). In the six basins, trends in  
478 P, Q and  $ET_{wb}$  are all upward. For example, at Jiayuqiao station, the annual  
479 streamflow showed slightly increasing trend which was consistent with that examined  
480 during 1980-2000 by Yao et al. (2012). The vegetation status, revealed by NDVI and  
481 LAI, turned better with the ascending air temperature. The aridity index (PET/P)  
482 decreased in all basins except for the Brahmaputra River above Tangjia station, which

483 indicated that most basins in the Indian monsoon-dominated regions turn wet over the  
484 period of 1982-2011. The runoff coefficient (Q/P) increased at Gongbujiangda and  
485 Nuxia while decreased at Jiayuqiao, Pangduo, Tangji and Yangcun stations. Moreover,  
486 the basin-wide SWE declined in the upper Salween River and Brahmaputra River  
487 above Pangduo, Tangjia and Gongbujiangda stations while increased in Brahmaputra  
488 River above Nuxia and Yangcun stations.

489 [< Figure 11, here please, thanks >](#)

### 490 **3.4 Uncertainties**

491 The results may unavoidably associate with several aspects of uncertainties inherited  
492 from the multi-source datasets. For example, although the seasonal cycles of  $ET_{wb}$   
493 can be captured by GLEAM\_E and VIC\_E, they still have considerable uncertainties  
494 at some stations (e.g., Numaitilangan, Gongbujiangda and Nuxia) (Fig.5). Compared  
495 to the annual trend of  $ET_{wb}$  (Table 4), most ET products (including the  
496 well-performed GLEAM\_E and VIC\_E in some basins) cannot detect the decreasing  
497 trends in 7 out of 18 basins (at Kulukelangan, Tongguziluoke, Xining, Tongren, Jimai,  
498 Nuxia and Gongbujiangda stations) due to their different forcing data; algorithm used  
499 as well as varied spatial-temporal resolutions (Xue et al., 2013; Li et al., 2014; Liu et  
500 al., 2016a). In particular, it is well known that land surface models have some  
501 difficulties (e.g., parameter tuning in boundary layer schemes) when applying to the  
502 TP, even though they have good performances in different regimes (Xia et al., 2012;  
503 Bai et al., 2016). For example, Xue et al. (2013) indicated that GNoah\_E  
504 underestimated the  $ET_{wb}$  in the upper Yellow River and Yangtze River basins on the  
505 Tibetan Plateau mainly due to its negative-biased precipitation forcing. We thus only  
506 used  $ET_{wb}$  in the trend detection of water budget components in Fig.8, Fig.10 and  
507 Fig.11 in this study. The two SWE products also showed large uncertainty with

508 respect to both their seasonal cycles and trends. The VIC\_IGSNRR simulated and  
509 GlobaSnow-2 SWEs have not been validated in the TP due to the lack of snow water  
510 equivalent observations, but in some basins (e.g., Zelingou and Numaitilangan) they  
511 showed similar seasonal cycles and annual trends.

512

513 Moreover, the interpolation of missing values of runoff with VIC\_IGSNRR simulated  
514 runoff and the gridded precipitation data (which interpolated from limited gauged  
515 precipitation over the plateau) also introduced uncertainties. There are also  
516 considerable uncertainties arising from empirical extending the ET series back prior  
517 to the GRACE era. Finally, we obtained the contributions of glacier-melt to discharge  
518 in some basins from the literatures and took them as constant numbers. It may inherit  
519 considerable uncertainty from varied studies using different approaches such as  
520 glacier mass-balance observation, isotope observation and hydrological modeling, and  
521 the contribution rates would also change under a warming climate. However, reliable  
522 quantification of the contribution of glacier-melt to discharge is technically  
523 challenging, especially for the data-sparse basins. With these caveats, we can interpret  
524 the general hydrological regimes and their responses to the changing climate in the TP  
525 basins from solely the perspective of multi-source datasets, which are comparable to  
526 the existing studies based on the in situ observations and complex hydrological  
527 modeling.

528 [<Table 5, here please, thanks>](#)

#### 529 **4 Summary**

530 In this study, we investigated the seasonal cycles and trends of water budget  
531 components in 18 TP basins during the period 1982-2011, which is not well  
532 understood so far due to the lack of adequate observations in the harsh environment,

533 through integrating the multi-source global/regional datasets such as gauge data,  
534 satellite remote sensing and land surface model simulations. By using a two-step bias  
535 correction procedure, we calculated the annual basin-wide  $ET_{wb}$  through the water  
536 balance approach considering the impacts of glacier and water storage change. We  
537 found that the GLEAM\_E and VIC\_E perform better relative to other products against  
538 the calculated  $ET_{wb}$ .

539

540 From the Budyko framework perspective, the general water and energy budgets are  
541 different in the westerlies-dominated (with higher aridity index, runoff coefficient and  
542 glacier cover), the Indian monsoon-dominated and the East Asian  
543 monsoon-dominated (with higher air temperature, vegetation cover and  
544 evapotranspiration) basins. In the 18 TP basins, precipitation is the major contributor  
545 to the river runoff, which concentrates mainly during June-October (June-August for  
546 the westerlies-dominated basins, June-September or June to October for the Indian  
547 monsoon-dominated and the East Asian monsoon-dominated basins). The basin-wide  
548 SWE is relatively high from mid-autumn to spring for all 18 TP basins except for  
549 Keliya River and Brahmaputra River above the Nuxia and Yangcun stations. The  
550 vegetation cover is relatively less whereas snow/glacier cover is more in the  
551 westerlies-dominant basins compared to other basins. In the period 1982-2011, we  
552 found that hydrologic cycle intensified across most of the basins in Tibetan Plateau;  
553 receded at some tributaries located at the upper Yellow River and Yalong River (due  
554 to weakening East Asian monsoon). The aridity index (PET/P) exhibited decrease in  
555 most TP basins which corresponded to the warming and moistening climate in the TP  
556 and western China. Moreover, the runoff coefficient (Q/P) declined in most basins  
557 which may be, to some extent, due to ET increase induced by vegetation greening and

558 the influences of snow and glacier changes. Although there are considerable  
559 uncertainties inherited from multi-source data used, the general hydrological regimes  
560 in the TP basins could be revealed, which are consistent to the existing results  
561 obtained from in situ observations and complex land surface modeling. It indicated  
562 the usefulness of integrating the multiple datasets (e.g., in situ observations, remote  
563 sensing-based products, reanalysis outputs, land surface model simulations and  
564 climate model outputs) for hydrological applications. The generalization here could  
565 be helpful for understanding the hydrological cycle and supporting sustainable water  
566 resources management and eco-environment protection in the Tibetan Plateau under  
567 global warming.

568

569 ***Author contributions.*** Wenbin Liu and Fubao Sun developed the idea to see the  
570 general water budgets in the TP basins from the perspective of multisource datasets.  
571 Wenbin Liu collected and processed the multiple datasets with the help of Yanzhong  
572 Li, Guoqing Zhang, Wee Ho Lim, Hong Wang as well as Peng Bai, and prepared the  
573 manuscript. The results were extensively commented and discussed by Fubao Sun,  
574 Jiahong Liu and Yan-Fang Sang.

575

576 ***Acknowledgements.*** This study was supported by the National Key Research and  
577 Development Program of China (2016YFC0401401 and 2016YFA0602402), National  
578 Natural Science Foundation of China (41401037 and 41330529), the Open Research  
579 Fund of State Key Laboratory of Desert and Oasis Ecology in Xinjiang Institute of  
580 Ecology and Geography, Chinese Academy of Sciences (CAS), the CAS Pioneer  
581 Hundred Talents Program (Fubao Sun), the CAS President's International Fellowship  
582 Initiative (2017PC0068) and the program for the "Bingwei" Excellent Talents from  
583 the Institute of Geographic Sciences and Natural Resources Research, CAS. We are



584 grateful to the NASA MEaSUREs Program (Sean Swenson) for providing the  
585 GRACE land data processing algorithm. The basin-wide water budget series in the TP  
586 Rivers used in this study are available from the authors upon request  
587 ([liuwb@igsnrr.ac.cn](mailto:liuwb@igsnrr.ac.cn)). We thank the editors and reviewers for their invaluable  
588 comments and constructive suggestions.

589

## 590 **References**

- 591 Akhtar, M., Ahmad, N., and Booij, M.J.: Use of regional climate model simulations as input for  
592 hydrological models for the Hindukush-Karakorum-Himalaya region, *Hydrol. Earth Syst. Sci.*  
593 13, 1075-1089, 2009.
- 594 Bai, P., Liu, X.M., Yang, T.T., Liang, K., and Liu, C.M.: Evaluation of streamflow simulation  
595 results of land surface models in GLDAS on the Tibetan Plateau, *J. Geophys. Res. Atmos.*, 121,  
596 12180-12197, 2016.
- 597 Berrisford, P, Lee, D., Poli, P., Brugge, R., Fielding, K., Fuentes, M., Kallberg, P., Kobayashi, S.,  
598 Uppala, S., and Simmons, A.: The ERA-interim archive. ERA Reports Series No. 1 Version 2.0,  
599 Available from: <[https://www.researchgate.net/publication/41571692\\_The\\_ERA-interim](https://www.researchgate.net/publication/41571692_The_ERA-interim_archive)  
600 archive>, 2011.
- 601 Bookhagen, B. and Burbank, D.W.: Toward a complete Himalayan hydrological budget:  
602 spatiotemporal distribution of snowmelt and rainfall and their impact on river discharge, *J.*  
603 *Geophys. Res.*, 115, F03019, 2010.
- 604 Bouraoui, F., Vachaud, G., Li, L.Z.X., LeTreut, H., and Chen, T.: Evaluation of the impact of  
605 climate changes on water storage and groundwater recharge at the watershed scale, *Clim. Dyn.*,  
606 15(2), 153-161, 1999.
- 607 Budyko, M.I.: *Climate and life*. Academic Press, 1974.
- 608 Chen, D., Xu, B., Yao, T., Guo, Z., Cui, P., Chen, F., Zhang, R., Zhang, X., Zhang, Y., Fan, J., Hou,  
609 Z., and Zhang, T.: Assessment of past, present and future environmental changes on the Tibetan  
610 Plateau, *Chinese SCI. Bull.*, 60(32), 3025-3035, 2015 (in Chinese).
- 611 Chen, J.: Lichenometrical studies on glacier changes during the Holocene Epoch at the sources

612 region of Urumqi River, *Sci. China B.*, 18(1), 95-104, 1988 (in Chinese).

613 Cuo, L., Zhang, Y.X., Bohn, T.J., Zhao, L., Li, J.L., Liu, Q.M., and Zhou, B.R.: Frozen soil  
614 degradation and its effects on surface hydrology in the northern Tibetan Plateau, *J. Geophys.*  
615 *Res. Atmos.*, 120(6), 8276-8298, 2015.

616 Cuo, L., Zhang, Y.X., Gao, Y., Hao, Z., and Cairang, L.: The impacts of climate change and land  
617 cover/use transition on the hydrology in the upper Yellow River Basin, China, *J. Hydrol.*, 502,  
618 37-52, 2013.

619 Cuo, L., Zhang, Y.X., Zhu, F.X., and Liang, L.Q.: Characteristics and changes of streamflow on  
620 the Tibetan Plateau: A review, *J. Hydrol. Reg. stud.*, 2, 49-68, 2014.

621 Dong, X., Yao, Z., and Chen, C.: Runoff variation and responses to precipitation in the source  
622 regions of the Yellow River, *Resour. Sci.*, 29(3), 67-73, 2007 (in Chinese).

623 Dong, W., Lin, Y., Wright, J.S., Ming, Y., Xie, Y., Wang, B., Luo, Y., Huang, W., Huang, J., Wang,  
624 L., Tian, L., Peng, Y., and Xu, F.: Summer rainfall over the southwestern Tibetan Plateau  
625 controlled by deep convection over the Indian Subcontinent, *Nat. Commun.*, 7, 10925, 2016.

626 Duan, A.M. and Wu, G.X.: Change of cloud amount and the climate warming on the Tibetan  
627 Plateau, *Geophys. Res. Lett.*, 33, L22704, 2006.

628 Fu, L., Chen, Y., Li, W., Xu, C., and He, B.: Influence of climate change on runoff and water  
629 resources in the headwaters of the Tarim River, *Arid Land Geogr.*, 31(2), 237-242, 2008 (in  
630 Chinese).

631 Fu, L., Chen, Y., Li, W., He, B., and Xu, C.: Relation between climate change and runoff volume  
632 in the headwaters of the Tarim River during the last 50 years., *J. Desert Res.*, 30(1), 204-209,  
633 2010 (in Chinese).

634 Guo, W.Q., Liu, S.Y., Yao, X.J., Xu, J.L., Shangguan, D.H., Wu, L.Z., Zhao, J.D., Liu, Q., Jiang,  
635 Z.L., Wei, J.F., Bao, E.J., Yu, P.C., Ding, L.F., Li, G., Ge, C.M., and Wang, Y.: The Second  
636 Glacier Inventory Dataset of China, Cold and Arid Regions Science Data Center at Lanzhou,  
637 doi: 10.3972/glacier.001.2013.db, 2014.

638 Hamed, K.H. and Rao, A.R.: A modified Mann-Kendall trend test for autocorrelation data,  
639 *J. Hydrol.*, 204(1-4), 182-196, 1998.

640 Huffman, G.J., , E.F., Bolvin, D.T., Nelkin, E.J., and Adler, R.F.: last updated 2013: TRMM

641 Version 7 3B42 and 3B43 Data Sets, NASA/GSFC, Greenbelt, MD. Data set accessed at  
642 [http://mirador.gsfc.nasa.gov/cgi-bin/mirador/](http://mirador.gsfc.nasa.gov/cgi-bin/mirador/presentNavigation.pl?tree=project&project=TRMM&dataGroup=Gridded&CGIS)  
643 [presentNavigation.pl?tree=project&project=TRMM&dataGroup=Gridded&CGIS](http://mirador.gsfc.nasa.gov/cgi-bin/mirador/presentNavigation.pl?tree=project&project=TRMM&dataGroup=Gridded&CGIS)  
644 [ESSID=5d12e2ffa38ca2aac6262202a79d882a](http://mirador.gsfc.nasa.gov/cgi-bin/mirador/presentNavigation.pl?tree=project&project=TRMM&dataGroup=Gridded&CGIS), 2012.

645 Harris, I., Jones, P.D., Osborn, T.J., and Lister, D.H.: Updated high-resolution grids of monthly  
646 climatic observations – the CRU TS3.10 Dataset, *Int. J. Climatol.*, 34 (3), 623-642, 2014.

647 Immerzeel, W.W., van Beek, L.P.H., and Bierkens, M.F.P.: Climate change will affect the Asian  
648 water towers, *Science*, 328, 1382-1385, 2010.

649 Jung, M., Reichstein, M., Ciais, P., Seneviratne, S.I., Sheffield, J., Goulden, M.L., Bonan, G.,  
650 Cescatti, A., Chen, J., de Jeu, R., Dolman, A.J., Eugster, W., Gerten, D., Gianelle, D., Gobron, N.,  
651 Heinke, J., Kimball, J., Law, B.E., Montagnani, L., Mu, Q., Mueller, B., Oleson, K., Papale, D.,  
652 Richardson, A.D., Rouspard, O., Running, S., Tomelleri, E., Viovy, N., Weber, U., Williams, C.,  
653 Wood, E., Zaehle, S., and Zhang, K.: Recent decline in the global land evapotranspiration trend  
654 due to limited moisture supply, *Nature*, 467, 951-954, 2010.

655 Kobayashi, S., Ota, Y., Harada, Y., Ebata, A., Moriya, M., Onoda, H., Onogi, K., kamahori, H.,  
656 kobayashi, C., Endo, H., miyaoka, K., and Takahashi, K.: The JRA-55 Reanalysis: General  
657 specifications and basic characteristics, *J.Meteor. Soc. Japan*, 93(1), 5-58, doi:  
658 10.2151/jmsj.2015-001, 2015.

659 Landerer, F.W. and Swenson, S.C.: Accuracy of scaled GRACE terrestrial water storage estimates,  
660 *Water Resour.Res.*, 48, W04531, 2012.

661 Li, F.P., Zhang, Y.Q., Xu, Z.X., Liu, C.M., Zhou, Y.C., and Liu, W.F.: Runoff predictions in  
662 ungauged catchments in southeast Tibetan Plateau, *J. Hydrol.*, 511, 28-38, 2014.

663 Li, F.P., Zhang, Y.Q., Xu, Z.X., Teng, J., Liu, C.M., Liu, W.F., and Mpelasoka, F.: The impact of  
664 climate change on runoff in the southeastern Tibetan Plateau, *J. Hydrol.*, 505, 188-201, 2013.

665 Li, J.P. and Zeng, Q.C.: A unified monsoon index, *Geophys. Res. Lett.*, 29(8), 1274, 2002.

666 Li, X.P., Wang, L., Chen, D.L., Yang, K., and Wang, A.H.: Seasonal evapotranspiration changes  
667 (1983-2006) of four large basins on the Tibetan Plateau, *J. Geophys. Res.*, 119 (23),  
668 13079-13095, 2014.

669 Liang, S.L. and Xiao, Z.Q.: Global Land Surface Products: Leaf Area Index Product Data  
670 Collection(1985-2010), Beijing Normal University, doi:10.6050/glass863.3004.db, 2012.

671 Liu, J., Liu, T., Bao, A., De Maeyer, P., Feng, X., Miller, S.N., and Chen, X.: Assessment of  
672 different modeling studies on the spatial hydrological processes in an arid alpine catchment,  
673 *Water Resour. Manag.*, 30, 1757-1770, 2016.

674 Liu, T.: Hydrological characteristics of Yalungzangbo River, *Acta Geogr. Sin.*, 54 (Suppl.),  
675 157-164, 1999 (in Chinese).

676 Liu, W.B. and Sun, F.B.: Assessing estimates of evaporative demand in climate models using  
677 observed pan evaporation over China, *J. Geophys. Res. Atmos.*, 121, 8329-8349, 2016.

678 Liu, W.B., Wang, L., Zhou, J., Li, Y.Z., Sun, F.B., Fu, G.B., Li, X.P., and Sang, Y-F.: A worldwide  
679 evaluation of basin-scale evapotranspiration estimates against the water balance method, *J.*  
680 *Hydrol.*, 538, 82-95, 2016a.

681 Liu, W.B., Wang, L., Chen, D.L., Tu, K., Ruan, C.Q., and Hu, Z.Y.: Large-scale circulation  
682 classification and its links to observed precipitation in the eastern and central Tibetan Plateau,  
683 *Clim. Dyn.*, 46, 3481-3497, 2016b.

684 Liu, X.M., Yang, T., Hsu, K., Liu, C., and Sorooshian, S.: Evaluating the streamflow simulation  
685 capability of PERSIANN-CDR daily rainfall products in two river basins on the Tibetan Plateau,  
686 *Hydrol. Earth Syst. Sci. Discuss.*, doi: 10.5194/hess-20160282, 2016.

687 Long, D., Shen, Y.J., Sun, A., Hong, Y., Longuevergne, L., Yang, Y.T., Li, B., and Chen, L.:  
688 Drought and flood monitoring for a large karst plateau in Southwest China using extended  
689 GRACE data, *Remote Sen. Environ.*, 155, 145-160, 2014.

690 Lucchesi, R.: File specification for MERRA products, GMAO Office Note No.1 (version 2.3), 82  
691 pp, available from [http://gmao.gsfc.nasa.gov/pubs/office\\_notes](http://gmao.gsfc.nasa.gov/pubs/office_notes), 2012.

692 Ma, N., Szilagyi, J., Niu, G.Y., Zhang, Y.S., Zhang, T., Wang, B.B., and Wu, Y.H.: Evaporation  
693 variability of Nam Co Lake in the Tibetan Plateau and its role in recent rapid lake expansion, *J.*  
694 *Hydrol.*, 537, 27-35, 2016.

695 Ma, N., Zhang, Y.S., Guo, Y.H., Gao, H.F., Zhang, H.B., and Wang, Y.F.: Environmental and  
28 / 55

696 biophysical controls on the evapotranspiration over the highest alpine steppe, *J. Hydrol.*, 529,  
697 980-992, 2015.

698 Mamat, A., Halik, W., and Yang, X.: The climatic changes of Qarqan river basin and its impact on  
699 the runoff, *Xinjiang Agric. Sci.*, 47 (5), 996-1001, 2010 (in Chinese).

700 Mansur, S. and Ajinisa, T.: An analysis of water resources and it's hydrological characteristics of  
701 Yarkend River Valley, *J. Xinjiang Norm. Univ. (Nat. Sci. Ed.)*, 24(1), 74-78, 2005 (in Chinese).

702 McVicar, T.R., Roderick, M., Donohue, R.J., Li, L.T., Van Niel, T.G., Thomas, A., Grieser, J.,  
703 Jhajharia, D., Himri, Y., Mahowald, N.M., Mescherskaya, A.V., Kruger, A.C., Rehman, S., and  
704 Dinpashoh, Y.: Global review and synthesis of trends in observed terrestrial near-surface wind  
705 speeds: implications for evaporation, *J. Hydrol.*, 416-417, 182-205, 2012.

706 Miralles, D.G., De Jeu, R.A.M., Gash, J.H., Holmes, T.R.H., and Dolman, A.J.: Magnitude and  
707 variability of land evaporation and its components at the global scale, *Hydrol. Earth Syst. Sci.*, 15,  
708 967-981, 2011.

709 Miralles, D.G., Gash, J.H., Holmes, T.R.H., de Jeu, R.A.M, and Dolman, A.J.: Global canopy  
710 interception from satellite observations, *J. Geophys. Res.*, 115, D16122, 2010.

711 Neckel, N., Kropáček, J., Bolch, T., and Hochschild, V.: Glacier mass changes on the Tibetan  
712 Plateau 2003-2009 derived from ICESat laser altimetry measurements, *Environ. Res. Lett.*, 9,  
713 014009(7pp), 2014.

714 Oliveira, P.T.S., Mearing, M.A., Moran, M.S., Goodrich, D.C., Wendland, E., and Gupta, H.V.:  
715 Trends in water balance components across the Brazilian Cerrado, *Water Resour. Res.*, 50,  
716 7100-7114, 2014.

717 Rodell, M., Houser, P.R., Jambor, U., Gottschalck, J., Mitchell, K., Meng, C.-J., Arsenault, K.,  
718 Cosgrove, B., Radakovich, J., Bosilovich, M., Entin, J.K., Walker, P., Lohmann, D., and Toll, D.:  
719 The global land data assimilation system, *B. Am. Meteorol. Soc.*, 85, 381-394, 2004.

720 Rui, H.: README Document for Global Land Data Assimilation System Version 2 (GLDAS-2)  
721 Products, GES DISC, 2011.

722 Saji, N.H., Goswami, B.N., Vinayachandran, P.N., and Yamagata, T.: A dipole mode in the tropical  
723 Indian Ocean, *Nature*, 401, 360-363, 1999.

724 Shen, M.G., Piao, S.L., Jeong, S., Zhou, L.M., Zeng, Z.Z., Ciais, P., Chen, D.L., Huang, M.T., Jin,  
725 C.S., Li, L.Z.X., Li, Y., Myneni, R.B., Yang, K., Zhang, G.X., Zhang, Y.J., and Yao, T.D.:  
29 / 55

726 Evaporative cooling over the Tibetan Plateau induced by vegetation growth, *Proc. Natl. Acad.*  
727 *Sci. U. S.A.*, 112(30), 9299-9304, 2015.

728 Shi, Y.F., Shen, Y.P., Li, D.L., Zhang, G.W., Ding, Y.J., Hu, R.J., and Kang, E.S.: Discussion on  
729 the present climate change from Warm2dry to Warm2wet in northwest China, *Quat. Sci.*, 23(2),  
730 152-164, 2003 (in Chinese).

731 Shepard, D.S.: Computer mapping: the SYMAP interpolation algorithm. *Spatial Statistics and*  
732 *Models*, G.L. Gaile and C.J. Willmott, Eds., D. Reidel, 133-145, 1984.

733 Sun, B., Mao, W., Feng, Y., Chang, T., Zhang, L., and Zhao, L.: Study on the change of air  
734 temperature, precipitation and runoff volume in the Yarkant River basin, *Arid Zone Res.*, 23(2),  
735 203-209, 2006 (in Chinese).

736 Takala, M., Luojus, K., Pulliainen, J., Derksen, C., Lemmetyinen, J., Kärnä J.-P., Koskinen, J., and  
737 Bojkov, B.: Estimating northern hemisphere snow water equivalent for climate research through  
738 assimilation of spaceborne radiometer data and ground-based measurements, *Remote*  
739 *Sens. Environ.*, 115 (12), 3517-3529, 2011.

740 Tapley, B.D., Bettadpur, S., Watkins, M., and Reigber, C.: The gravity recovery and climate  
741 experiment: mission overview and early results, *Geophys. Res. Lett.*, 31, L09607, 2004.

742 Tian, L., Yao, T., MacClune, K., White, J.W.C., Schilla, A., Vaughn, B., Vachon, R., and  
743 Ichiyanagi, K.: Stable isotopic variations in west China: a consideration of moisture sources, *J.*  
744 *Geophys. Res. Atmos.*, 112, D10112, 2007.

745 Tucker, C.J., Pinzon, J.E., Brown, M.E., Slayback, D., Pak, E.W., Mahoney, R., Vermote, E., and  
746 El Saleous, N.: An extended AVHRR 8 km NDVI data set compatible with MODIS and SPOT  
747 vegetation NDVI data, *Int. J. Remote Sens.*, 26(20), 4485-4498, 2005.

748 von Storch, H.: Misuses of statistical analysis in climate research, In *Analysis of Climate*  
749 *Variability: Applications of Statistical Techniques*, Springer-Verlag: Berlin, 11-26, 1995.

750 Wang, A. and Zeng, X.: Evaluation of multireanalysis products within site observations over the  
751 Tibetan Plateau, *J. Geophys. Res.*, 117, D05102, 2012.

752 Wang, L., Sun, L.T., Shrestha, M., Li, X.P., Liu, W.B., Zhou, J., Yang, K., Lu, H., and Chen, D.L.:  
753 Improving snow process modeling with satellite-based estimation of

754 near-surface-air-temperature lapse rate, *J. Geophys. Res. Atmos.*, 121, 12005-12030, 2016.

755 Xia, Y., Mitchell, K., Ek, M., Cosgrove, B., Sheffield, J., Luo, L., Alonge, C., Wei, H., Meng, J.,  
756 Livneh, B., and Duang, Q.: Continental-scale water and energy flux analysis and validation for  
757 North American Land Data Assimilation System project phase 2 (NLDAS-2): 2. Validation of  
758 model-simulated streamflow, *J. Geophys. Res. Atmos.*, 117(D3), D03110, 2012.

759 Xiang, L., Wang, H., Steffen, H., Wu, P., Jia, L., Jiang, L., and Shen, Q.: Groundwater storage  
760 changes in the Tibetan Plateau and adjacent areas revealed from GRACE satellite gravity data,  
761 *Earth Planet. Sci. Lett.*, 449, 228-239, 2016.

762 Xu, L.: The land surface water and energy budgets over the Tibetan Plateau, Available from  
763 Nature Precedings < <http://hdl.handle.net/10101/npre.2011.5587.1>>, 2011.

764 Xue, B.L., Wang, L., Yang, K., Tian, L., Qin, J., Chen, Y., Zhao, L., Ma, Y., Koike, T., Hu, Z., and  
765 Li, X.P.: Modeling the land surface water and energy cycle of a mesoscale watershed in the  
766 central Tibetan Plateau with a distributed hydrological model, *J. Geophys. Res. Atmos.*, 118,  
767 8857-8868, 2013.

768 Yao, Z., Duan, R., and Liu, Z.: Changes in precipitation and air temperature and its impacts on  
769 runoff in the Nujiang River basins. *Resour. Sci.* 34(2), 202-210, 2012 (in Chinese)

770 Yang, K., Qin, J., Zhao, L., Chen, Y.Y., Tang, W.J., Han, M.L., Lazhu, Chen, Z.Q., Lv, N., Ding,  
771 B.H., Wu, H., and Lin, C.G.: A multi-scale soil moisture and freeze-thaw monitoring network  
772 on the third pole, *Bull. Am. Meteorol. Soc.*, 94,1907-1916, 2013.

773 Yang, K., Wu, H., Qin, J., Lin, C.G., Tang, W.J., and Chen, Y.Y.: Recent climate changes over the  
774 Tibetan Plateau and their impacts on energy and water cycle: a review, *Glob. Planet Change*,  
775 112, 79-91, 2014.

776 Yao, T.D., Thompson, L., Yang, W., Yu, W.S., Gao, Y., Guo, X.J., Yang, X.X., Duan, K.Q., Zhao,  
777 H.B., Xu, B.Q., Pu, J.C., Lu, A.X., Xiang, Y., Kattel, D.B., and Joswiak, D.: Different glacier  
778 status with atmospheric circulations in Tibetan Plateau and surroundings, *Nat. Clim. Change*, 2,  
779 1-5, 2012.

780 Yao, Y.J., Zhao, S.H., Zhang, Y.H., Jia, K., and Liu, M.: Spatial and decadal variations in potential  
781 evapotranspiration of China based on reanalysis datasets during 1982-2010, *Atmosphere*, 5,  
782 737-754, 2014.

783 Yin, G., Hu, Z.Y., Chen, X., and Tiyip, T.: Vegetation dynamics and its response to climate change  
31 / 55

784 in Central Asia, *J. Arid Land*, 8, 375, 2016.

785 Yu, J., Zhang, G., Yao, T., Xie, H., Zhang, H., Ke, C., and Yao, R.: Developing daily cloud-free  
786 snow composite products from MODIS Terra-Aqua and IMS for the Tibetan Plateau, *IEEE*  
787 *Trans. Geosci. Remote Sens.*, 54(4), 2171-2180, 2015.

788 Yue, S., Pilon, P., Phinney, B., Cavadias, G.: The influence of autocorrelation on the ability to  
789 detect trend in hydrological series, *Hydrol. Process.*, 16(9), 1807-1829, 2002.

790 Zhang, D., Liu, X., Zhang, Q., Liang, K., and Liu, C.: Investigation of factors affecting  
791 inter-annual variability of evapotranspiration and streamflow under different climate conditions.  
792 *J. Hydrol.*, doi:10.1016/j.jhydrol.2016.10.047, 2016.

793 Zhang, G., Xie, H., Yao, T., Liang, T., and Kang, S.: Snow cover dynamics of four lake basins  
794 over Tibetan Plateau using time series MODIS data (2001-2100), *Water Resour. Res.*, 48(10),  
795 W10529, 2012.

796 Zhang, K., Kimball, J.S., Nemani, R.R., and Running, S.W.: A continuous satellite-derived global  
797 record of land surface evapotranspiration from 1983 to 2006, *Water Resour. Res.*, 46(9),  
798 W09522, 2010.

799 Zhang, L., Su, F., Yang, D., Hao, Z., and Tong, K.: Discharge regime and simulation for the  
800 upstream of major rivers over Tibetan Plateau, *J. Geophys. Res. Atmos.*, 118(15), 8500-8518,  
801 2013.

802 Zhang, Q., Li, J., Singh, V., and Xu, C.: Copula-based spatial-temporal patterns of precipitation  
803 extremes in China, *Int. J. Climatol.*, 33, 1140-1152, 2013.

804 Zhang, X., Tang, Q., Pan, M., and Tang, Y.: A long-term land surface hydrologic fluxes and states  
805 dataset for China, *J. Hydrometeorol.*, 15, 2067-2084, 2014.

806 Zhang, Y., Peñá-Arancibia, J.L., McVicar, T.R., Chiew, F.H.S., Vaze, J., Liu, C.M., Lu, X.J.,  
807 Zheng, H.X., Wang, Y.P., Liu, Y.Y., Miralles, D.G., and Pan, M.: Multi-decadal trends in global  
808 terrestrial evapotranspiration and its components, *Scientific Reports*, 6, 19124, 2016.

809 Zhang, Y., Liu, C., Tang, Y., and Yang, Y.: Trend in pan evaporation and reference and actual  
810 evapotranspiration across the Tibetan Plateau, *J. Geophys. Res.*, 112, D12110, 2007.

811 Zhou, C., Jia, S., Yan, H., and Yang, G.: Changing trend of water resources in Qinghai Province  
812 from 1956 to 2000, *J. Glaciol. Geocryol.*, 27(3), 432-437, 2005 (in Chinese).

813 Zhou, J., Wang, L., Zhang, Y.S., Guo, Y.H., Li, X.P., and Liu, W.B.: Exploring the water storage  
32 / 55



814 changes in the largest lake (Selin Co) over the Tibetan Plateau during 2003-2012 from a  
815 basin-wide hydrological modeling,. *Water Resour. Res.*, 51, 8060-8086, 2015.

816 Zhou, S.Q., Kang, S., Chen, F., and Joswiak, D.R.: Water balance observations reveal significant  
817 subsurface water seepage from Lake Nam Co., south-central Tibetan Plateau,. *J. Hydrol.*, 491,  
818 89-99, 2013.

819 Zhou, S.Q., Wang, Z., and Joswiak, D.R.:From precipitation to runoff: stable isotopic fractionation  
820 effect of glacier melting on a catchment scale, *Hydrol. Process.*, 28(8), 3341-3349, 2014.

821 Zhu, Y., Chen, J., Chen, G.: Runoff variation and its impacting factors in the headwaters of the  
822 Yangtze River in recent 32 years, *J. Yangtze River Sci. Res. Inst.*, 28(6), 1-4, 2011 (in Chinese ).

823 **Table 1:** Overview of multi-source datasets applied in this study

| Data category                             | Data source                                   | Spatial resolution | Temporal resolution | Available period used | Reference              |
|-------------------------------------------|-----------------------------------------------|--------------------|---------------------|-----------------------|------------------------|
| Runoff (Q)                                | Observed, National Hydrology Almanac of China | —                  | Daily               | 1982-2011             | —                      |
|                                           | VIC_IGSNRR simulated                          | 0.25°              | Daily               | 1982-2011             | Zhang et al. (2014)    |
| Precipitation (P)                         | Observed, CMA                                 | 0.5°               | Monthly             | 1982-2011             | —                      |
|                                           | TRMM 3B43 V7                                  | 0.25°              | Monthly             | 2000-2011             | Huffman et al. (2012)  |
|                                           | IGSNRR forcing                                | 0.25°              | Daily               | 1982-2011             | Zhang et al. (2014)    |
| Temperature (Temp.)                       | Observed, CMA                                 | 0.5°               | Monthly             | 2000-2011             | —                      |
| Terrestrial storage change ( $\Delta S$ ) | GRACE-CSR                                     | Approx.300-400 km  | Monthly             | 2002-2011             | Tapley et al. (2004)   |
|                                           | GRACE-GFZ                                     | Approx.300-400 km  | Monthly             | 2002-2011             | Tapley et al. (2004)   |
|                                           | GRACE-JPL                                     | Approx.300-400 km  | Monthly             | 2002-2011             | Tapley et al. (2004)   |
| Potential evaporation (PET)               | CRU                                           | 0.5°               | Monthly             | 1982-2011             | Harris et al. (2013)   |
| Actual evaporation (ET)                   | MTE_E                                         | 0.5°               | Monthly             | 1982-2011             | Jung et al. (2010)     |
|                                           | VIC_E                                         | 0.25°              | Daily               | 1982-2011             | Zhang et al. (2014)    |
|                                           | GLEAM_E                                       | 0.25°              | Daily               | 1982-2011             | Miralles et al. (2011) |
|                                           | PML_E                                         | 0.5°               | Monthly             | 1982-2011             | Zhang Y et al. (2016)  |
|                                           | Zhang_E                                       | 8 km               | Monthly             | 1983-2006             | Zhang et al. (2010)    |
|                                           | GNoah_E                                       | 1.0°               | 3 hourly            | 1982-2011             | Rui (2011)             |
| NDVI                                      | GIMMS NDVI dataset                            | 8 km               | 15 daily            | 1982-2011             | Tucker et al. (2005)   |
| LAI                                       | GLASS LAI Product                             | 0.05°              | 8 daily             | 1982-2011             | Liang and Xiao (2012)  |
| Snow Cover                                | TP Snow composite Products                    | 500 m              | Daily               | 2005-2013             | Zhang et al. (2012)    |
| SWE                                       | VIC_IGSNRR simulated                          | 0.25°              | Daily               | 1982-2011             | Zhang et al. (2014)    |
|                                           | GlobSnow-2 Product                            | 25 km              | Daily               | 1982-2011             | Takala et al. (2011)   |
| Glacier Area                              | the Second Glacier Inventory Dataset of China | —                  | —                   | 2005                  | Guo et al. (2014)      |

824 **Table 2:** Main features of the 18 TP river basins used in this study. The precipitation and temperature statistics for each basin were calculated from the observed  
825 CMA datasets while the NDVI and LAI statistics were extracted from the GIMMS NDVI dataset and GLASS LAI product. The GA% and SC% represented the  
826 percentages of multiyear-mean glacier cover and snow cover in each basin which were calculated from the Second Glacier Inventory Dataset of China and the daily  
827 TP snow cover dataset (2005-2013)

828

| No. | Station       | Altitude<br>(m) | River name  | Drainage area<br>(km <sup>2</sup> ) | Multiyear-mean (1982-2011) and basin-averaged parameters |               |              |      |      |       |       |
|-----|---------------|-----------------|-------------|-------------------------------------|----------------------------------------------------------|---------------|--------------|------|------|-------|-------|
|     |               |                 |             |                                     | Q (mm/yr)                                                | Prec. (mm/yr) | Temp.(°C/yr) | NDVI | LAI  | GA%   | SC%   |
| 01  | Kulukelangan  | 2000            | Yerqiang    | 32880.00                            | 158.60                                                   | 128.34        | -5.68        | 0.05 | 0.03 | 10.97 | 35.03 |
| 02  | Tongguziluke  | 1650            | Yulongkashi | 14575.00                            | 151.56                                                   | 134.04        | -4.07        | 0.06 | 0.04 | 23.27 | 35.95 |
| 03  | Numaitilangan | 1880            | Keliya      | 7358.00                             | 103.18                                                   | 137.14        | -4.78        | 0.06 | 0.03 | 10.86 | 29.16 |
| 04  | Zelingou      | 4282            | Bayin       | 5544.00                             | 41.42                                                    | 340.68        | -4.98        | 0.13 | 0.09 | 0.09  | 21.22 |
| 05  | Gadatan       | 3823            | Yellow      | 7893.00                             | 200.95                                                   | 566.01        | -4.60        | 0.34 | 0.54 | 0.13  | 14.94 |
| 06  | Xining        | 3225            | Yellow      | 9022.00                             | 99.90                                                    | 503.74        | 0.97         | 0.36 | 0.70 | 0.00  | 10.06 |
| 07  | Tongren       | 3697            | Yellow      | 2832.00                             | 149.36                                                   | 533.25        | -1.37        | 0.39 | 0.83 | 0.00  | 9.42  |
| 08  | Tainaihai     | 2632            | Yellow      | 121972.00                           | 159.48                                                   | 540.32        | -2.40        | 0.34 | 0.72 | 0.09  | 15.89 |
| 09  | Huangheyan    | 4491            | Yellow      | 20930.00                            | 31.18                                                    | 386.42        | -4.81        | 0.23 | 0.61 | 0.00  | 17.25 |
| 10  | Jimai         | 4450            | Yellow      | 45015.00                            | 85.50                                                    | 441.48        | -4.16        | 0.26 | 0.52 | 0.00  | 20.05 |
| 11  | Yajiang       | 2599            | Yalong      | 67514.00                            | 237.66                                                   | 717.05        | -0.23        | 0.43 | 0.80 | 0.15  | 18.36 |
| 12  | Zhimenda      | 3540            | Yangtze     | 137704.00                           | 96.23                                                    | 405.66        | -4.83        | 0.20 | 0.26 | 0.96  | 17.87 |
| 13  | Jiaoyuqiao    | 3000            | Salween     | 72844.00                            | 364.26                                                   | 620.88        | -1.89        | 0.29 | 0.44 | 2.02  | 23.73 |
| 14  | Pangduo       | 5015            | Brahmaputra | 16459.00                            | 348.31                                                   | 544.59        | -1.53        | 0.27 | 0.33 | 1.66  | 23.33 |
| 15  | Tangjia       | 4982            | Brahmaputra | 20143.00                            | 350.61                                                   | 555.17        | -1.89        | 0.27 | 0.34 | 1.39  | 21.83 |
| 16  | Gongbujiangda | 4927            | Brahmaputra | 6417.00                             | 586.96                                                   | 692.06        | -4.24        | 0.27 | 0.36 | 4.12  | 25.99 |
| 17  | Nuxia         | 2910            | Brahmaputra | 191235.00                           | 307.38                                                   | 401.35        | -0.73        | 0.22 | 0.25 | 1.90  | 13.50 |
| 18  | Yangcun       | 3600            | Brahmaputra | 152701.00                           | 163.25                                                   | 349.91        | -0.87        | 0.19 | 0.18 | 1.28  | 10.52 |

829

830 **Table 3:** Contribution of glacier-melt to discharge in 18 TP basins (“—” shows no glacier influences, “—\*” shows the percentage is empirically estimated through  
831 the relation between lacier area ratio and glacier melt for basins in which the glacier melt contribution has been reported in the literatures)  
832

| Basin         | Contributions of glacier-melt to discharge (%) | Reference                |
|---------------|------------------------------------------------|--------------------------|
| Kulukelangan  | 62.7                                           | Mansur and Ajnisa (2005) |
| Tongguziluoke | 64.9                                           | Liu J et al. (2016)      |
| Numaitilangan | 71.0                                           | Chen (1988)              |
| Zelingou      | —                                              | —                        |
| Gadatan       | —                                              | —                        |
| Xining        | —                                              | —                        |
| Tongren       | —                                              | —                        |
| Tainaihai     | 0.8                                            | Zhang et al. (2013)      |
| Huangheyuan   | —                                              | —                        |
| Jimai         | —                                              | —                        |
| Yajiang       | 1.4                                            | —*                       |
| Zhimenda      | 6.5                                            | Zhang et al. (2013)      |
| Jiaoyuqiao    | 4.8                                            | Zhang et al. (2013)      |
| Nuxia         | 11.6                                           | Zhang et al. (2013)      |
| Pangduo       | 10.1                                           | —*                       |
| Tangjia       | 8.5                                            | —*                       |
| Gongbujiangda | 25.2                                           | —*                       |
| Yangcun       | 7.8                                            | —*                       |

833  
834  
835

836 **Table 4:** Annual-averaged water storage changes ( $\Delta S$ ) in 18 TP basins derived from GRACE retrievals (2002-2013) from three different processing centers (CSR,  
837 GFZ and JPL)

838

| Basin         | Water storage Change ( $\Delta S$ ,mm) |       |       |
|---------------|----------------------------------------|-------|-------|
|               | CSR                                    | GFZ   | JPL   |
| Kulukelangan  | -0.16                                  | -0.16 | -0.00 |
| Tongguziluoke | 0.10                                   | 0.10  | 0.28  |
| Numaitilangan | 0.24                                   | 0.22  | 0.41  |
| Zelingou      | 0.63                                   | 0.41  | 0.69  |
| Gadatan       | 0.02                                   | -0.24 | -0.03 |
| Xining        | -0.08                                  | -0.35 | -0.14 |
| Tongren       | -0.13                                  | -0.41 | -0.21 |
| Tainaihai     | 0.12                                   | -0.16 | 0.10  |
| Huangheyan    | 0.60                                   | 0.35  | 0.70  |
| Jimai         | 0.41                                   | 0.15  | 0.48  |
| Yajiang       | -0.23                                  | -0.50 | -0.21 |
| Zhimenda      | 0.57                                   | 0.38  | 0.78  |
| Jiaoyuqiao    | -1.00                                  | -1.13 | -0.79 |
| Nuxia         | -1.42                                  | -1.44 | -1.31 |
| Pangduo       | -1.21                                  | -1.29 | -1.02 |
| Tangjia       | -1.40                                  | -1.46 | -1.24 |
| Gongbujiangda | -1.61                                  | -1.67 | -1.47 |
| Yangcun       | -1.33                                  | -1.34 | -1.21 |

839

840

841 **Table 5:** Nonparametric trends for different ET estimates during the period 1982-2006 detected by modified Mann-Kendall test, the bold number showed the  
 842 detected trend is statistically significant at the 0.05 level

| 843 | Basin         | ET <sub>wb</sub> | GLEAM_E     | VIC_E       | Zhang_E      | PML_E       | MET_E        | GNoah_E     |
|-----|---------------|------------------|-------------|-------------|--------------|-------------|--------------|-------------|
| 844 |               |                  |             |             |              |             |              |             |
| 845 | Kulukelangan  | <b>-0.09</b>     | 0.09        | <b>0.18</b> | –            | 0.03        | -0.01        | 0.07        |
|     | Tongguziluoke | -0.02            | 0.10        | <b>0.13</b> | –            | 0.03        | <b>-0.08</b> | 0.19        |
| 846 | Numaitilangan | 0.04             | <b>0.10</b> | 0.14        | –            | 0.14        | <b>-0.10</b> | 0.22        |
|     | Zelingou      | <b>0.13</b>      | <b>0.23</b> | 0.11        | <b>0.09</b>  | 0.04        | <b>0.06</b>  | 0.02        |
| 847 | Gadatan       | -0.09            | 0.25        | 0.070       | -0.10        | -0.01       | <b>0.06</b>  | -0.07       |
|     | Xining        | -0.06            | <b>0.54</b> | 0.01        | -0.08        | 0.01        | 0.02         | -0.06       |
| 848 | Tongren       | -0.06            | <b>0.34</b> | -0.15       | <b>-0.17</b> | 0.07        | 0.02         | 0.13        |
|     | Tainaihai     | 0.06             | <b>0.28</b> | -0.03       | <b>-0.11</b> | 0.04        | <b>0.05</b>  | 0.04        |
| 849 | Huangheyang   | 0.08             | <b>0.19</b> | -0.01       | <b>-0.10</b> | <b>0.08</b> | <b>0.05</b>  | <b>0.10</b> |
|     | Jimai         | -0.07            | <b>0.23</b> | -0.01       | -0.08        | 0.03        | <b>0.05</b>  | 0.10        |
| 850 | Yajiang       | 0.17             | <b>0.26</b> | <b>0.06</b> | <b>-0.21</b> | -0.01       | 0.03         | -0.02       |
|     | Zhimenda      | 0.11             | <b>0.28</b> | 0.10        | 0.01         | 0.07        | <b>0.04</b>  | 0.07        |
| 851 | Jiaoyuqiao    | <b>0.18</b>      | <b>0.28</b> | 0.10        | <b>-0.11</b> | 0.05        | <b>0.05</b>  | 0.07        |
|     | Nuxia         | <b>-0.09</b>     | <b>0.25</b> | 0.09        | <b>-0.10</b> | <b>0.12</b> | <b>0.04</b>  | 0.10        |
| 852 | Pangduo       | 0.05             | <b>0.28</b> | <b>0.17</b> | <b>-0.07</b> | 0.07        | <b>0.07</b>  | <b>0.11</b> |
|     | Tangjia       | 0.09             | <b>0.26</b> | <b>0.17</b> | <b>-0.09</b> | <b>0.20</b> | <b>0.06</b>  | <b>0.12</b> |
| 853 | Gongbujiangda | -0.26            | 0.12        | 0.13        | <b>-0.16</b> | <b>0.19</b> | 0.01         | <b>0.15</b> |
|     | Yangcun       | 0.03             | <b>0.28</b> | 0.08        | <b>-0.06</b> | 0.10        | 0.04         | 0.09        |

854

855

856 **Figure captions:**

857 **Figure1.** Map of river basins and hydrological gauging stations (green dots) over the  
858 Tibetan Plateau (TP) used in this study. The grey shading shows the topography of TP  
859 in meters above the sea level and the blue shading exhibits the glaciers distribution in  
860 TP extracted from the Second Glacier Inventory Dataset of China.

861 **Figure 2.** Comparison of VIC\_IGSNRR simulated and observed monthly runoff for  
862 Tangnaihai and Panduo stations (a and b) as well as (c) basin-averaged monthly  
863 TRMM, CMA gridded and IGSNRR forcing precipitations for the smallest basin  
864 (Tongren station) over the period 1982-2011. (d) shows the comparison of TRMM  
865 (blue) and IGSNRR forcing (red) precipitations against CMA gridded precipitation for  
866 18 river basins over TP during the period 2000-2011.

867 **Figure 3.** Comparison of different ET products against the calculated ET through the  
868 water balance method ( $ET_{wb}$ ) at the monthly time scale for 18 TP basins during the  
869 period 1983-2006. The boxplot of monthly estimates of different ET products for 18  
870 TP basins are shown in (a) while the correlation coefficients and  
871 root-mean-square-errors (RMSEs, mm/month) for each ET product relatively to  $ET_{wb}$   
872 are exhibited in (b).

873 **Figure 4.** General water and energy status (a. the perspective of Budyko framework)  
874 and their relationships with glacier (b) and vegetation (c and d) for eighteen TP river  
875 basins (1983-2006). The ET used in this figure is calculated from the bias-corrected  
876 water balance method.

877 **Figure 5.** Seasonal cycles (1982-2011) of water budget components in westerlies-  
878 dominated (column 1), East Asian monsoon-dominated (columns 2-4) and Indian  
879 monsoon-dominated (columns 5-6) TP basins.

880 **Figure 6.** Seasonal cycles (1982-2011) of air temperature and vegetation parameters  
881 in westerlies-dominated (column 1), East Asian monsoon-dominated (columns 2-4)  
882 and Indian monsoon-dominated (columns 5-6) TP basins.

883 **Figure 7.** Seasonal cycles (1982-2011) of snow cover and snow water equivalent  
884 (SWE) in westerlies-dominated (column 1), East Asian monsoon-dominated (columns

885 2-4) and Indian monsoon-dominated (columns 5-6) TP basins. The snow cover was  
886 extracted from cloud free snow composite product during the period 2005-2013. It  
887 should also be noted that the GlobSnow data are not available for some basins.

888 **Figure 8.** Sen's slopes of water budget components and vegetation parameters in  
889 westerlies-dominated TP basins during the period of 1982-2011. The double red stars  
890 showed that the trend was statistically significant at the 0.05 level.

891 **Figure 9.** Linear and non-parametric trends of westerly, Indian monsoon and East  
892 Asian summer monsoon during the period 1982-2011 revealed prospectively by the  
893 Asian Zonal Circulation Index, Indian Ocean Dipole Mode Index and East Asian  
894 Summer Monsoon Index.

895 **Figure 10.** Similar to Figure 8 but for East Asian monsoon-dominated TP basins. It  
896 should be noted that the GlobSnow data are not available for some basins. The double  
897 red stars showed that the trend was statistically significant at the 0.05 level.

898 **Figure 11.** Similar to Figure 8 but for Indian monsoon-dominated TP basins. It should  
899 be noted that the GlobSnow data are not available for some basins. The double red  
900 stars showed that the trend was statistically significant at the 0.05 level.



901 **Figure 1.** Map of river basins and hydrological gauging stations (green dots) over the Tibetan Plateau (TP) used in this study. The grey shading shows the  
902 topography of TP in meters above the sea level and the blue shading exhibits the glaciers distribution in TP extracted from the Second Glacier Inventory Dataset of  
903 China.

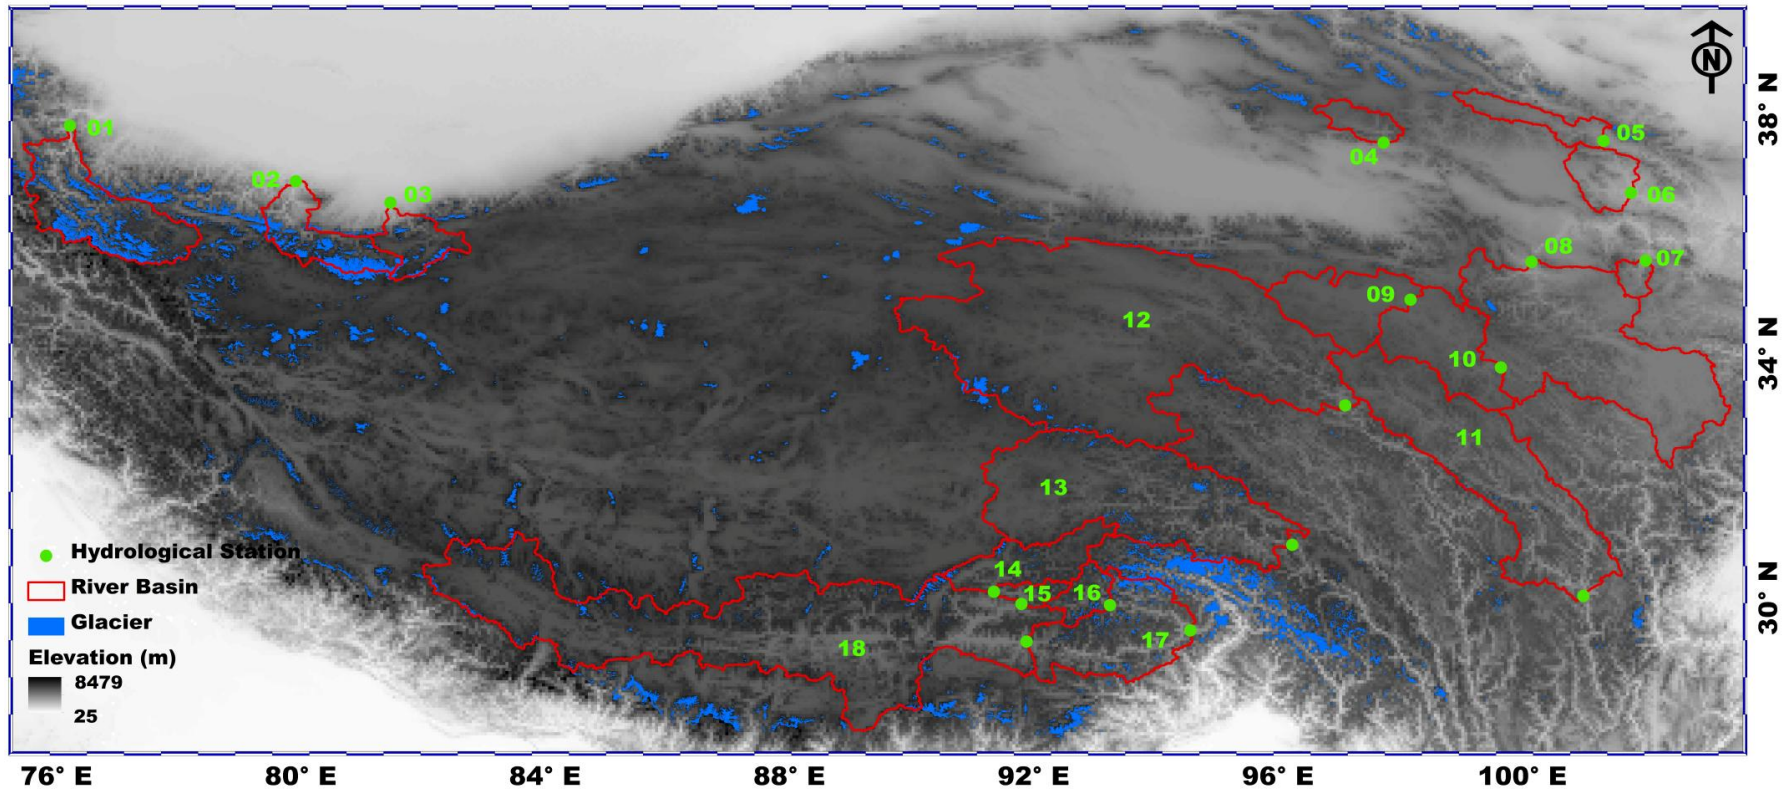

904  
905

906 **Figure 2.** Comparison of VIC\_IGSNRR simulated and observed monthly runoff for Tangnaihai and Panduo stations (a and b) as well as (c) basin-averaged  
 907 monthly TRMM, CMA gridded and IGSNRR forcing precipitations for the smallest basin (Tongren station) over the period 1982-2011. (d) shows the comparison of  
 908 TRMM (blue) and IGSNRR forcing (red) precipitations against CMA gridded precipitation for 18 river basins over TP during the period 2000-2011.

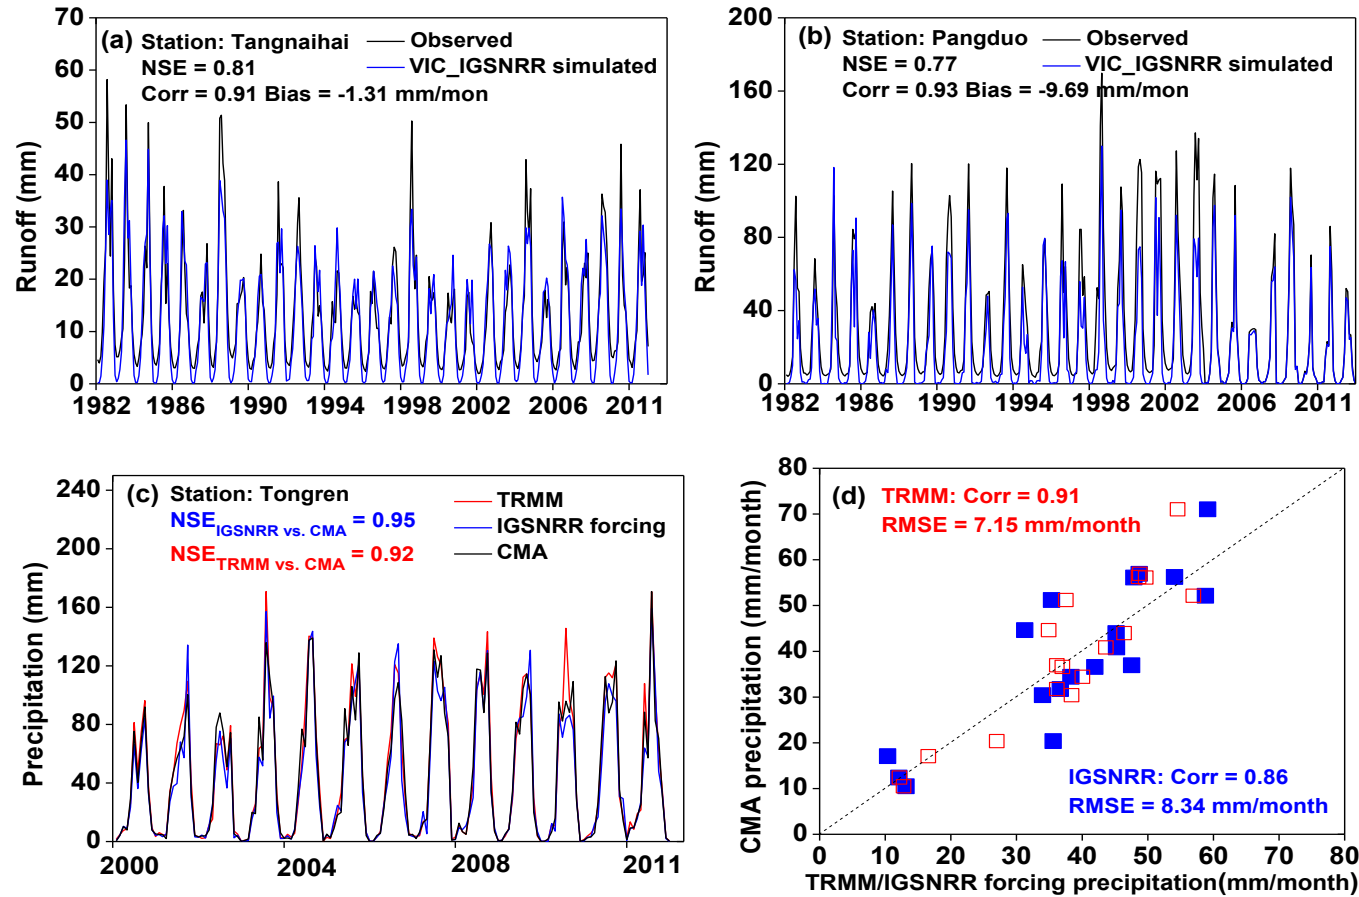

909

910

911

912 **Figure 3.** Comparison of different ET products against the calculated ET through the water balance ( $ET_{wb}$ ) at the monthly time scale for 18 river basins over the  
 913 Tibetan Plateau during the period 1983-2006. The boxplot of monthly estimates of different ET products for 18 TP basins are shown in (a) while the correlation  
 914 coefficients and root-mean-square-errors (RMSEs, mm/month) for each ET product relatively to  $ET_{wb}$  are exhibited in (b).

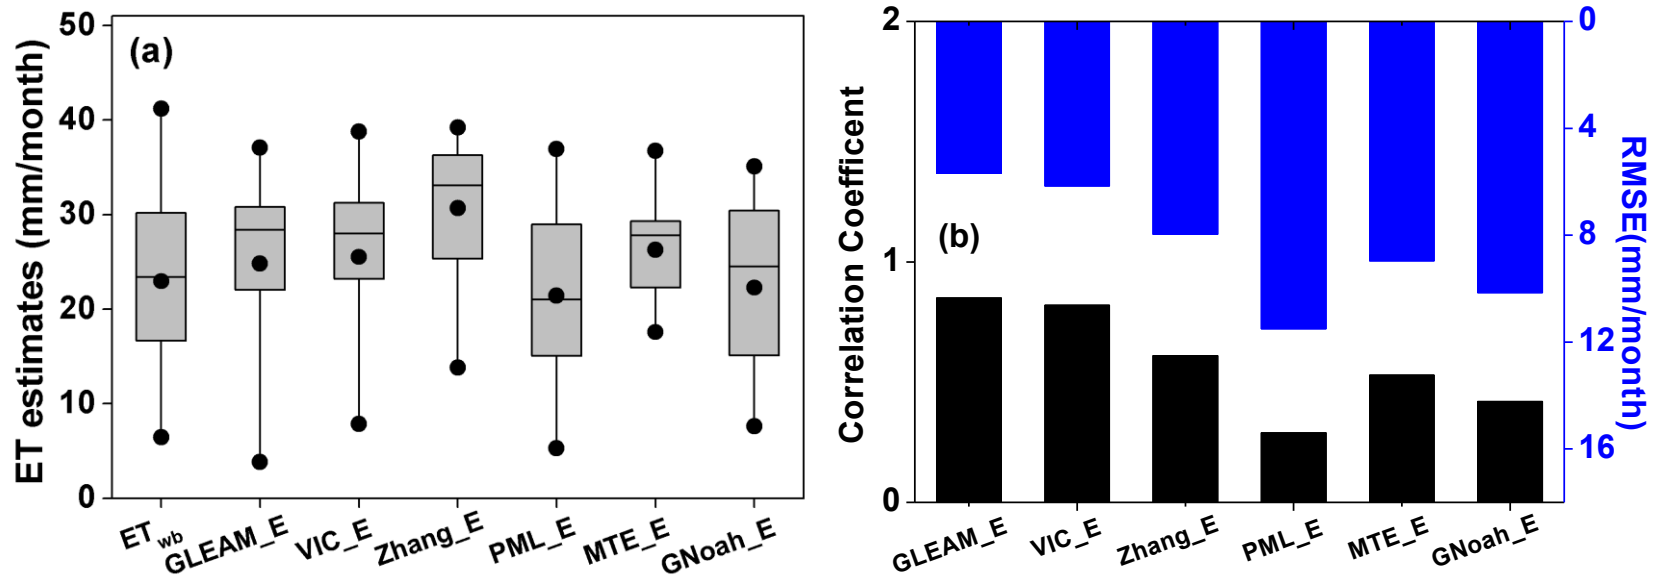

915

916

917 **Figure 4.** General water and energy status (a. the perspective of Budyko framework) and their relationships with glacier (b) and vegetation (c and d) for eighteen  
 918 TP river basins (1983-2006). The ET used in this figure is calculated from the bias-corrected water balance method.

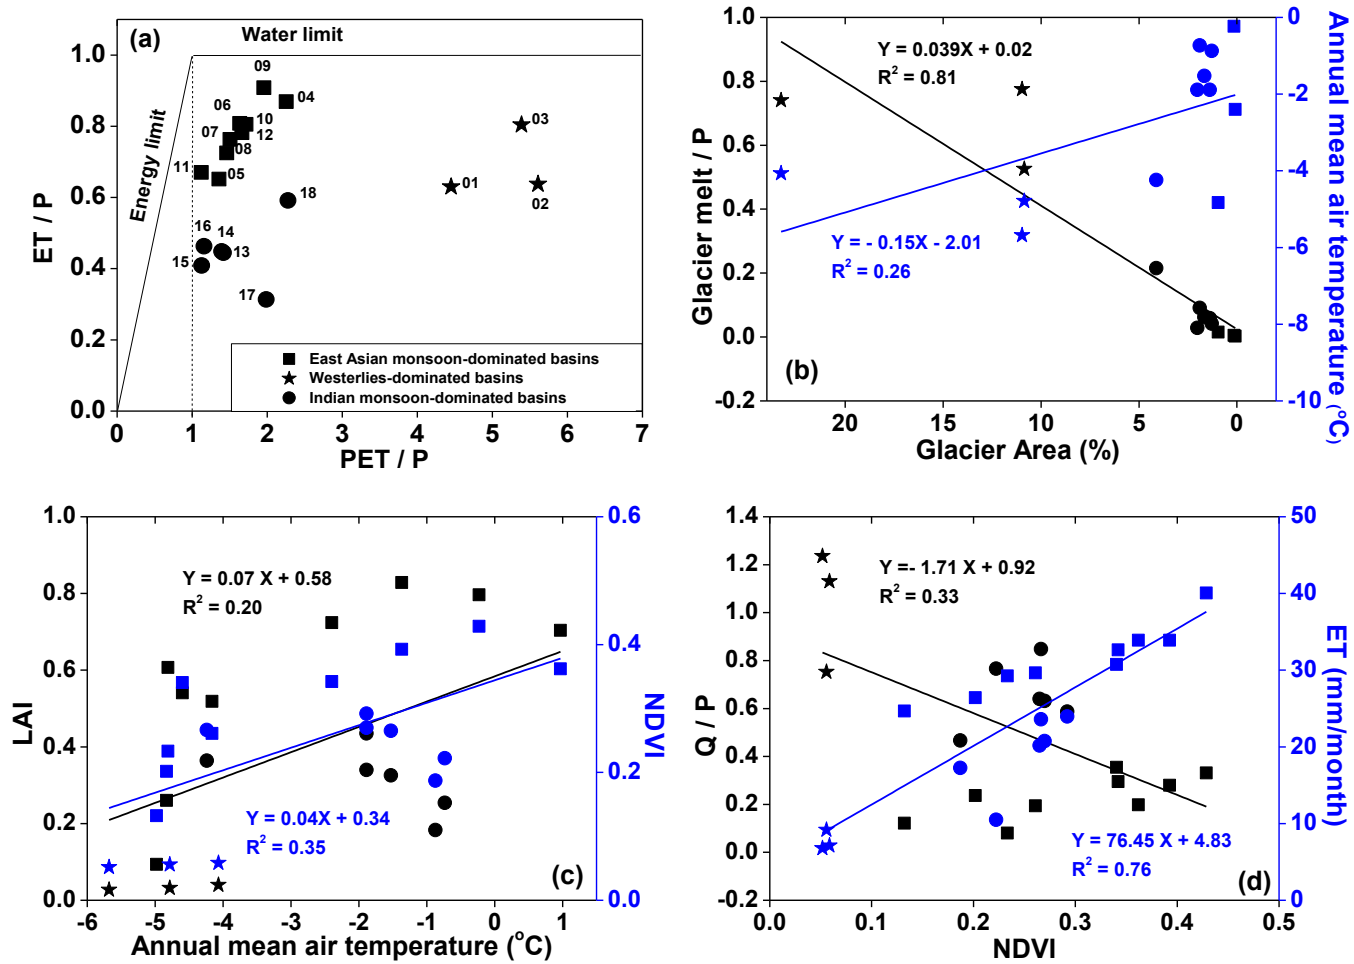

919

920

921 **Figure 5.** Seasonal cycles (1982-2011) of water budget components in westerlies-dominated (column 1), East Asian monsoon-dominated (columns 2-4) and Indian  
 922 monsoon-dominated (columns 5-6) TP basins.

923

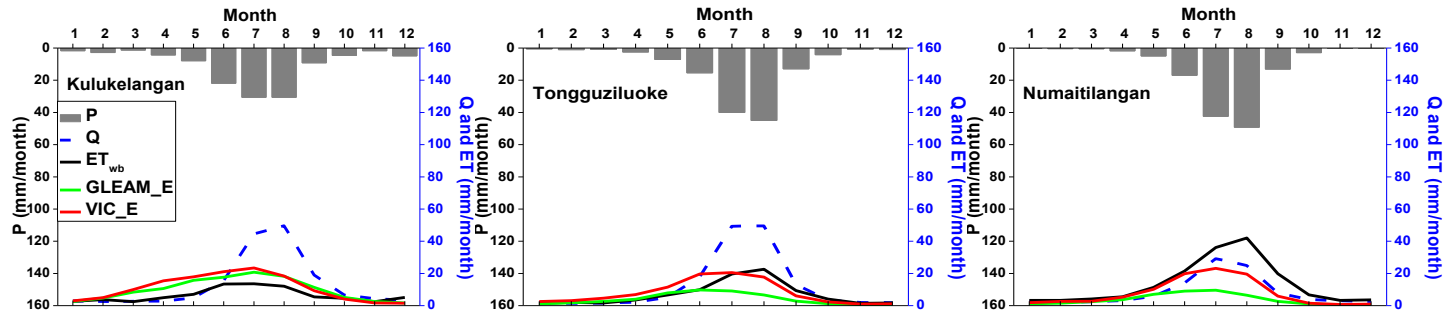

924

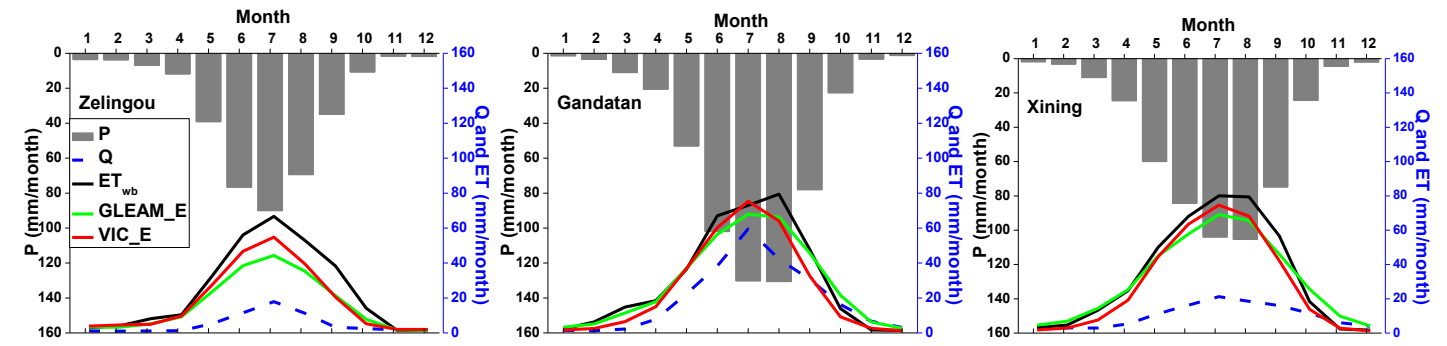

925

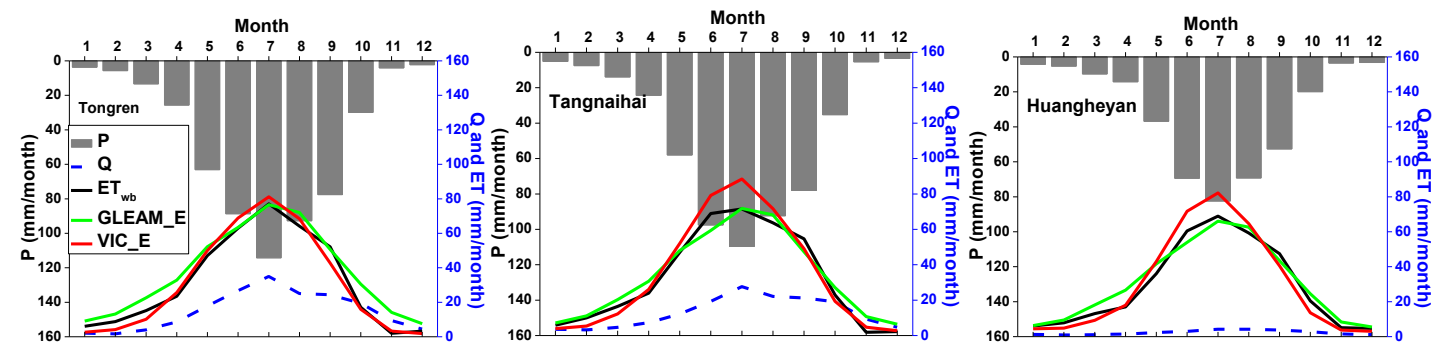

926

Figure 5: (continued)

927

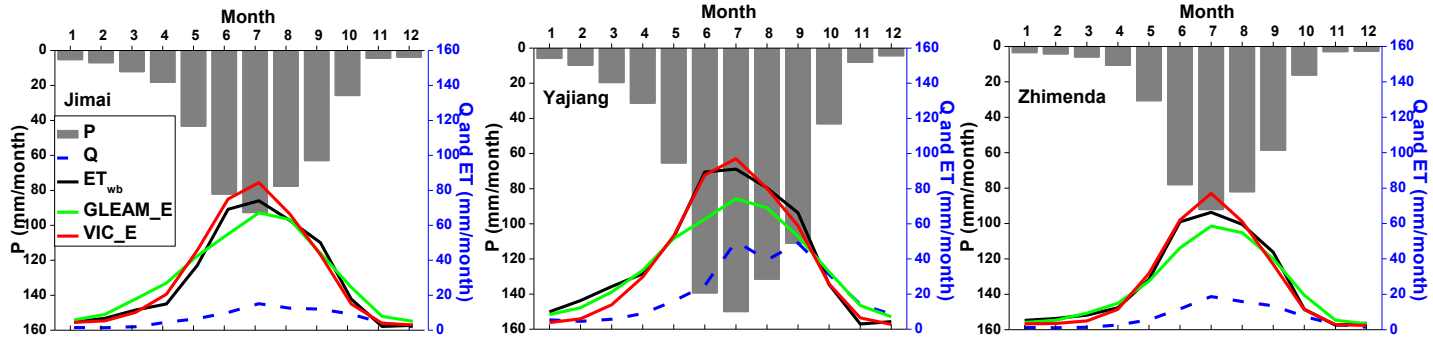

928

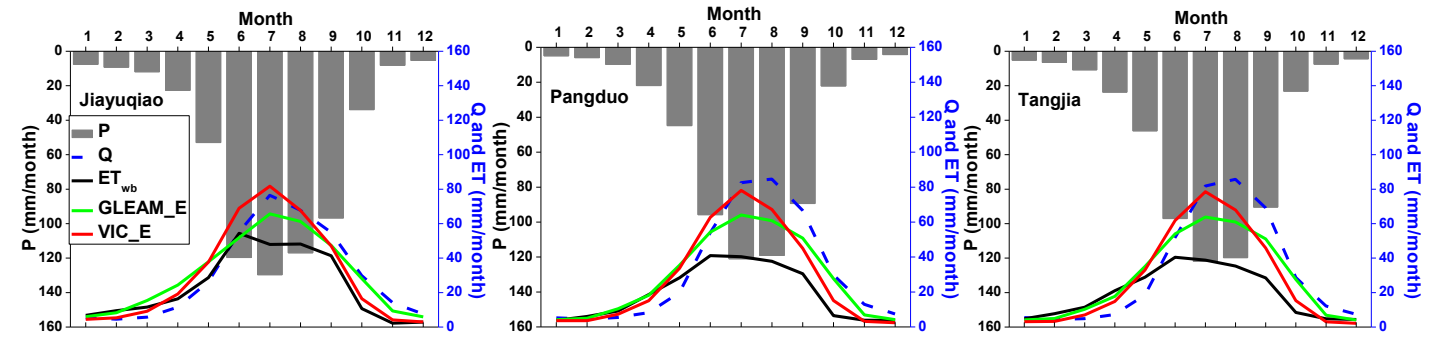

929

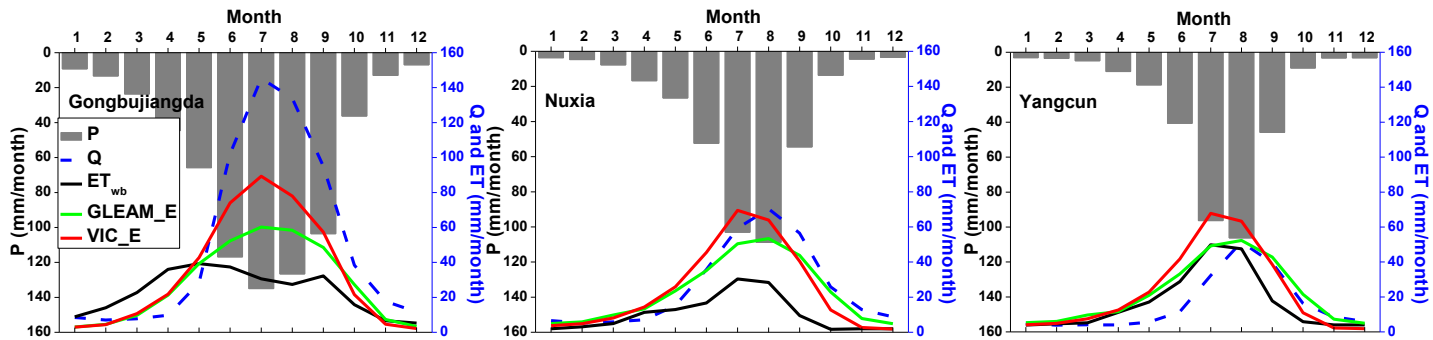

930 **Figure 6.** Seasonal cycles (1982-2011) of air temperature and vegetation parameters in westerlies-dominated (column 1), East Asian monsoon-dominated (columns  
 931 2-4) and Indian monsoon-dominated (columns 5-6) TP basins.

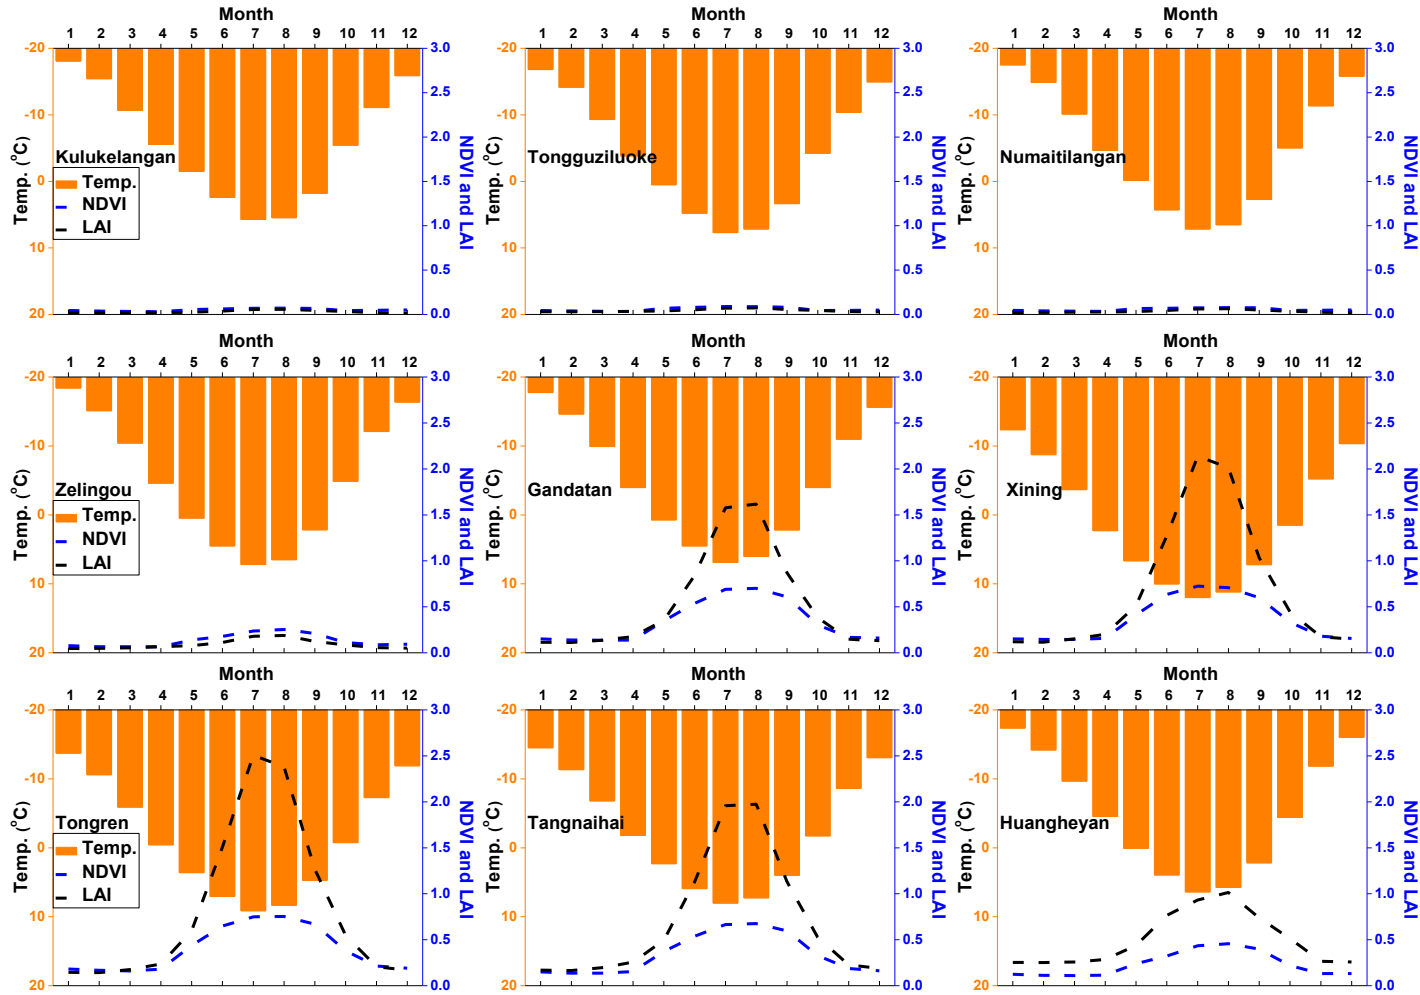

932

933

934

935

936

937

938

939

Figure 6: (continued)

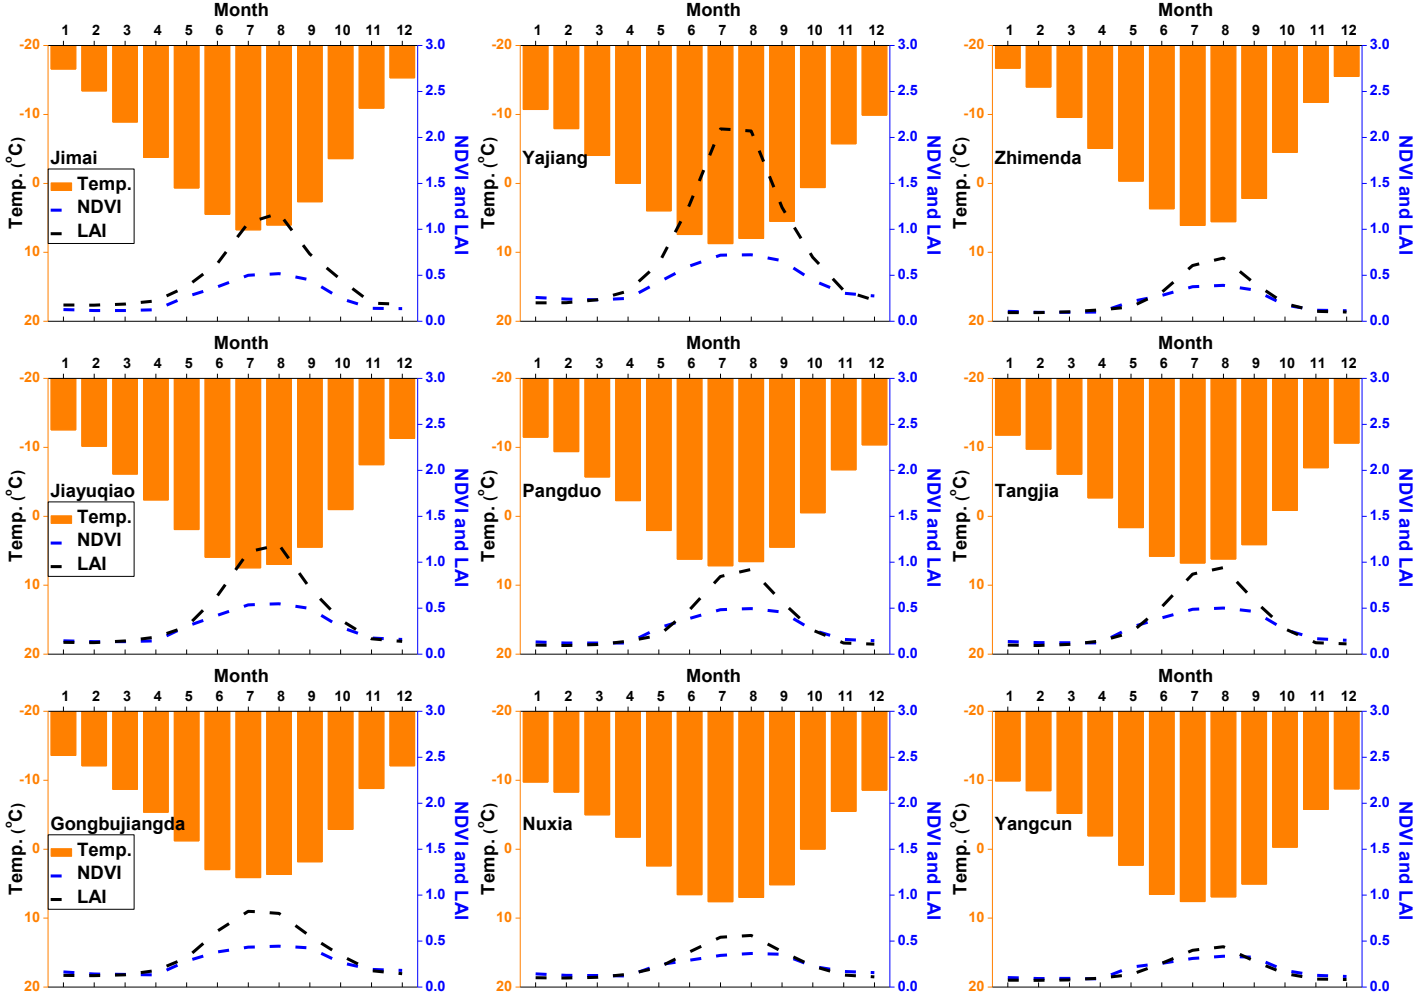



940 **Figure 7.** Seasonal cycles (1982-2011) of snow cover and snow water equivalent (SWE) in westerlies-dominated (column 1), East Asian monsoon- dominated  
941 (columns 2-4) and Indian monsoon-dominated (columns 5-6) TP basins. The snow cover was extracted from cloud free snow composite product during the period  
942 2005-2013. It should also be noted that the GlobSnow data are not available for some basins.  
943

944

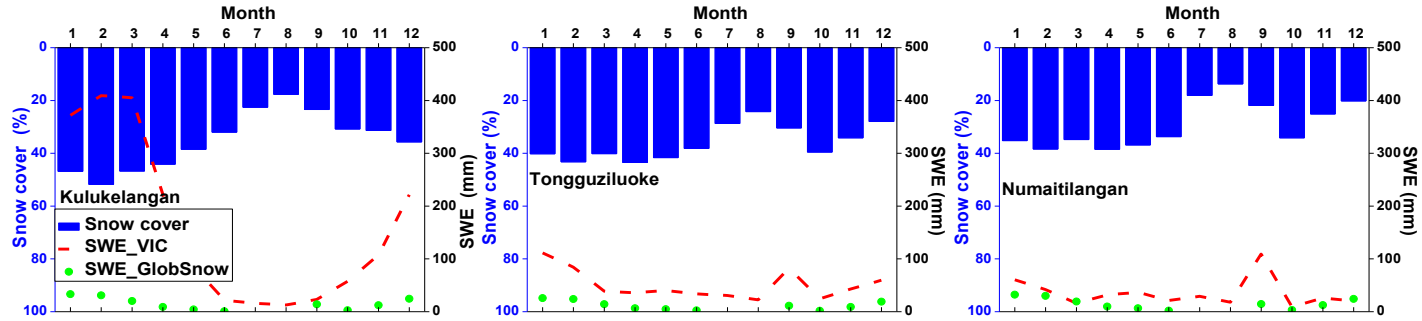

945

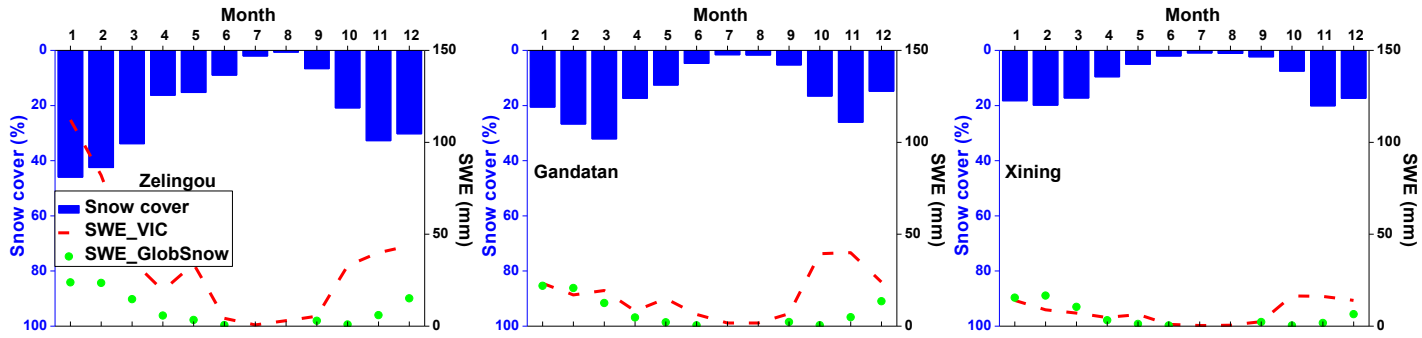

946

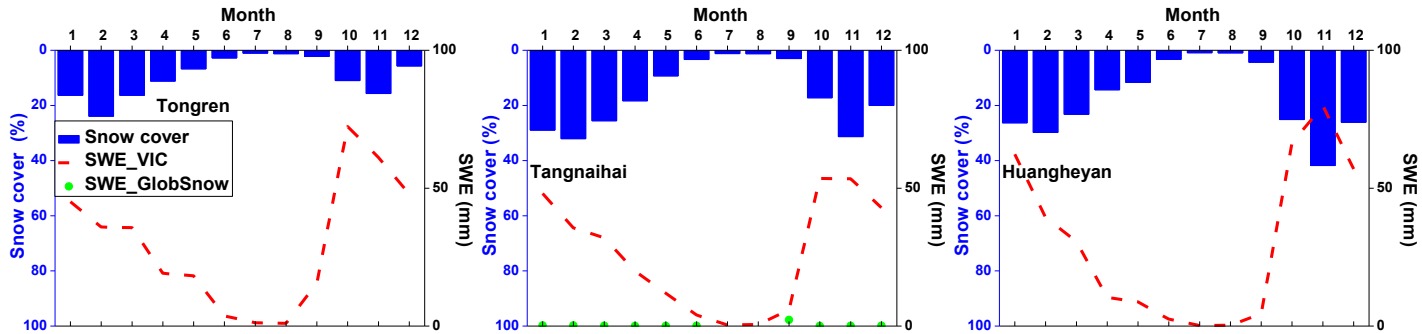

947

948

949

Figure 7: (continued)

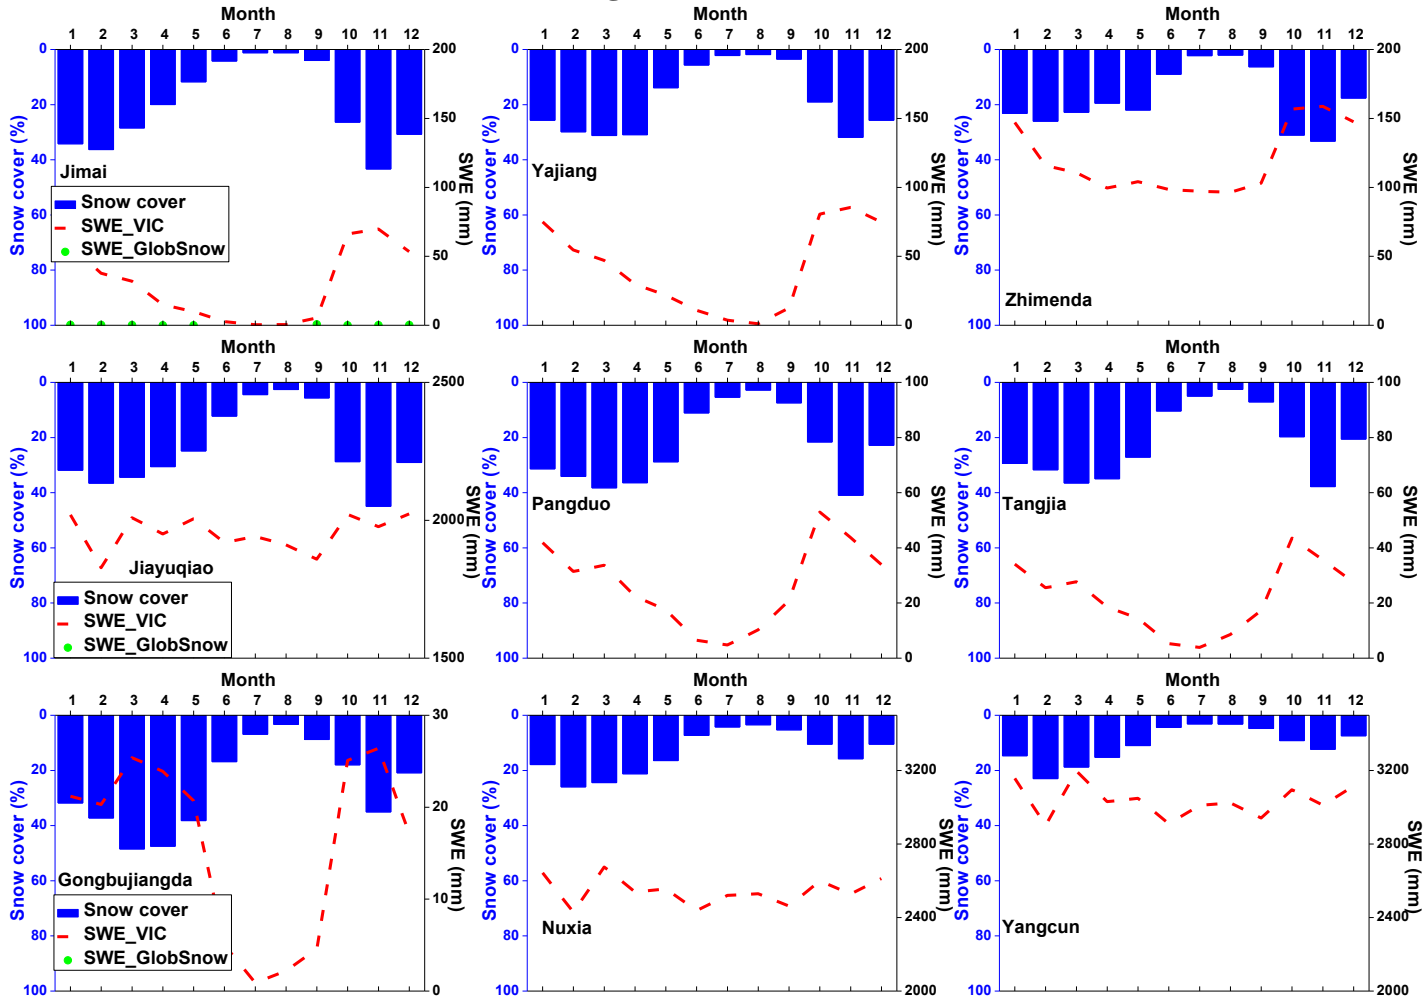

950

951

952

953

954 **Figure 8.** Sen's slopes of water budget components and vegetation parameters in westerlies-dominated TP basins during the period of 1982-2011. The double red  
 955 stars showed that the trend was statistically significant at the 0.05 level.

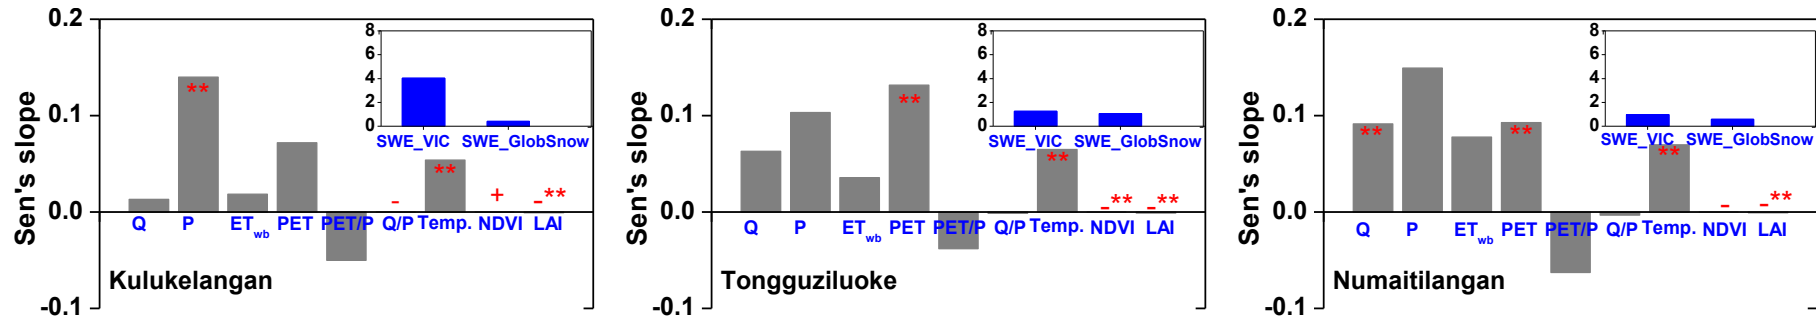

956  
 957

958 **Figure 9.** Linear and non-parametric trends of westerly, Indian monsoon and East Asian summer  
 959 monsoon during the period 1982-2011 revealed prospectively by the Asian Zonal Circulation  
 960 Index, Indian Ocean Dipole Mode Index and East Asian Summer Monsoon Index.

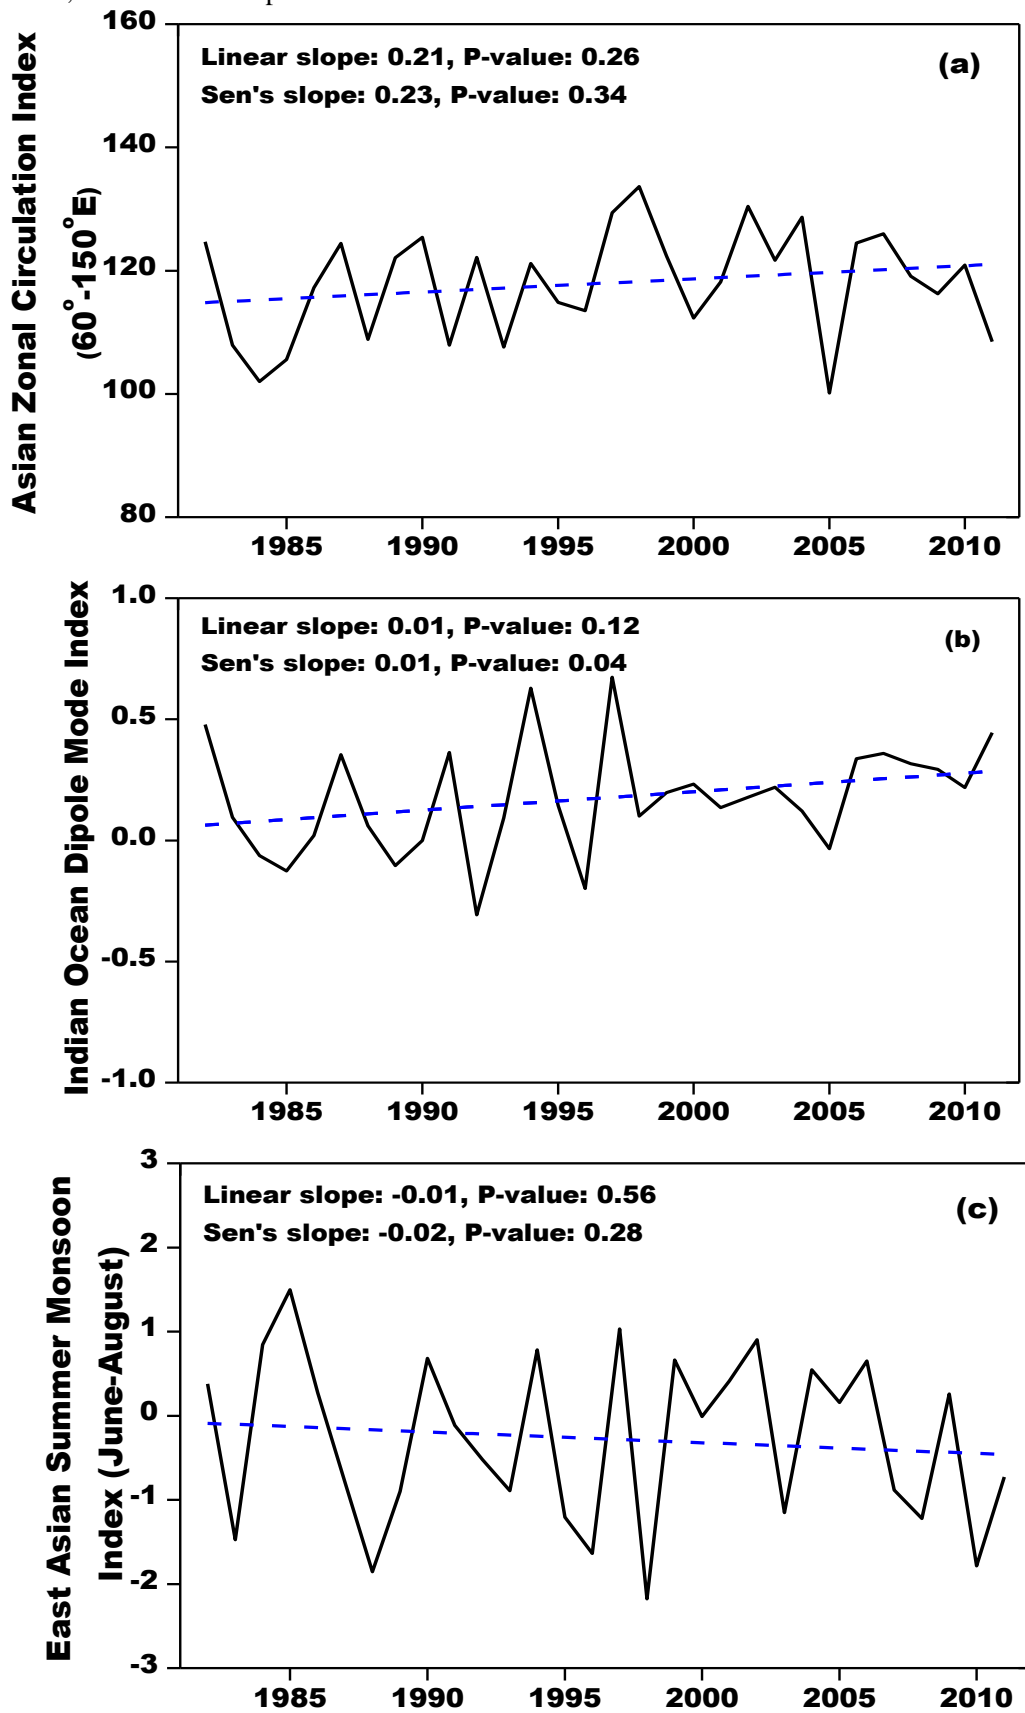

961

962

963

964 **Figure 10.** Similar to Figure 8 but for East Asian monsoon-dominated TP basins. It should be noted that the GlobSnow data are not available for some basins. The  
 965 double red stars showed that the trend was statistically significant at the 0.05 level.  
 966

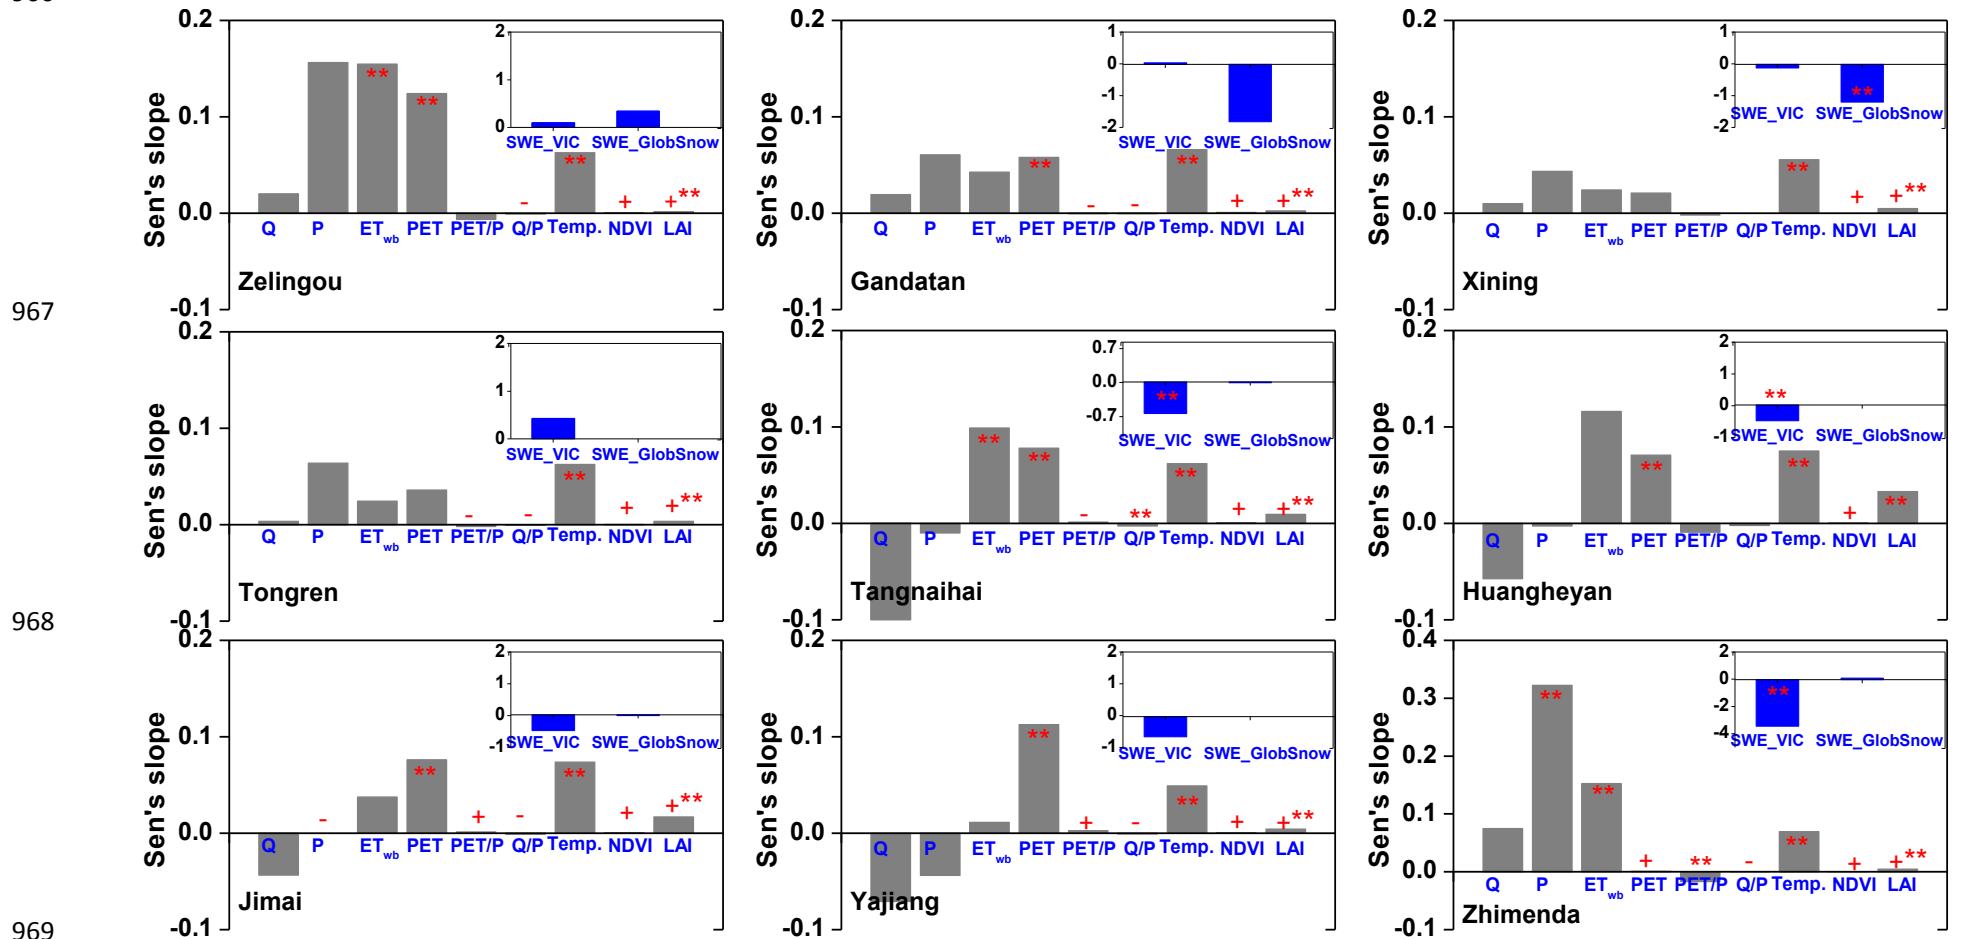

972 **Figure 11.** Similar to Figure 8 but for Indian monsoon-dominated TP basins. It should be noted that the GlobSnow data are not available for some basins. The  
 973 double red stars showed that the trend was statistically significant at the 0.05 level.  
 974

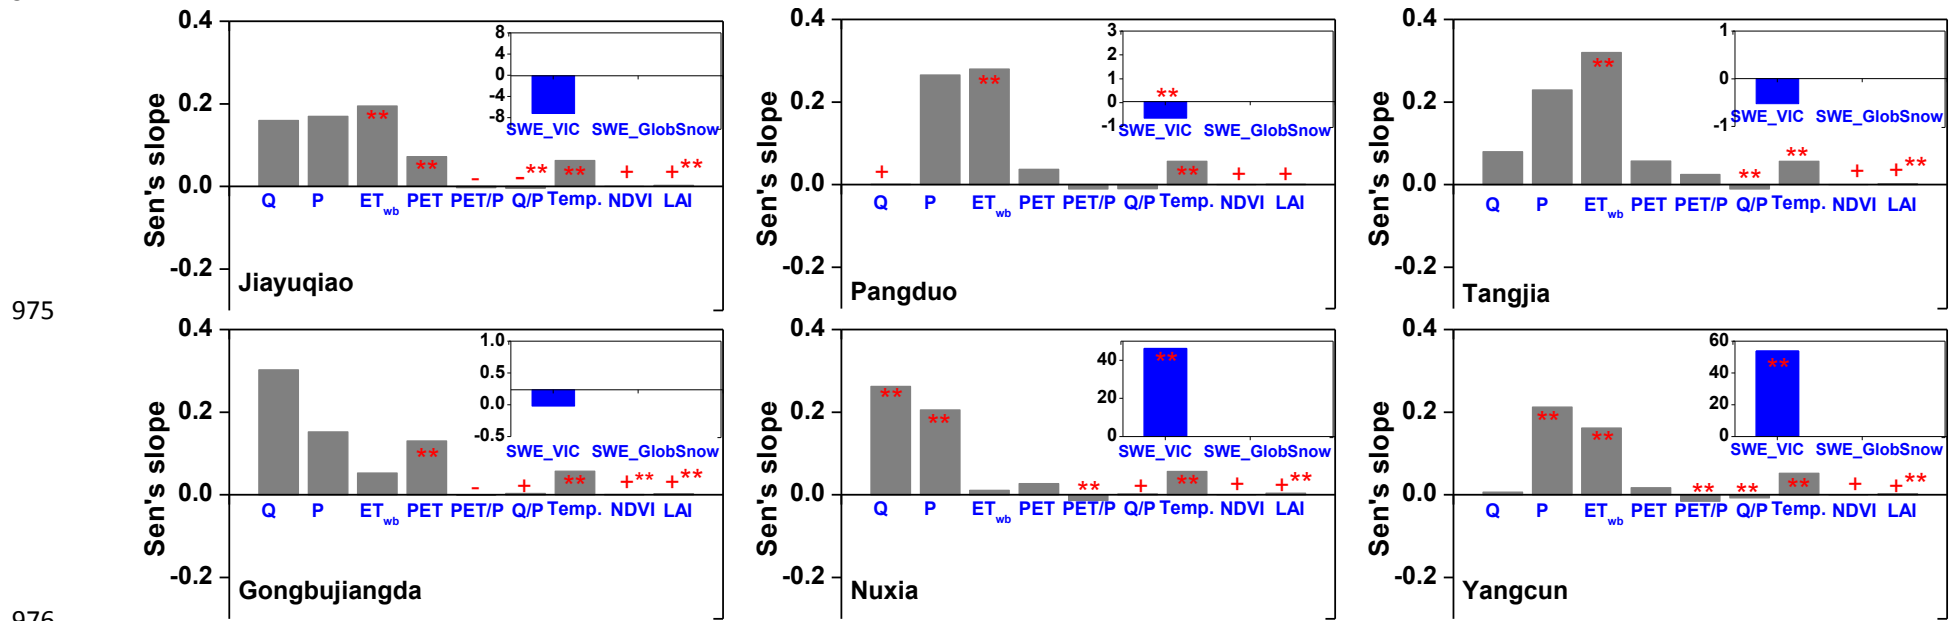

Supplement: Supplementary file [file hess-2016-624-AC8-supplement.pdf]
