# Supplementary material for: Seasonal cycles and trends of water budget components in 18 river basins across Tibetan Plateau: a multiple datasets perspective
Source: Copernicus journal article supplement (doi:10.5194/hess-2016-624), 2016-11-25
Supplement: Supplementary file [file hess-2016-624-AC3-supplement.pdf]

1

2 **Seasonal cycles and trends of water budget components in 18**  
3 **river basins across [the](#) Tibetan Plateau: a multiple datasets**  
4 **perspective**

5

6 Wenbin Liu<sup>a</sup>, Fubao Sun<sup>a\*</sup>, Yanzhong Li<sup>a</sup>, Guoqing Zhang<sup>b,c</sup>,  
7 Yan-Fang Sang<sup>a</sup>, Jiahong Liu<sup>d</sup>, Hong Wang<sup>a</sup>, Peng Bai<sup>a</sup>

8

9 <sup>a</sup>Key Laboratory of Water Cycle and Related Land Surface Processes, Institute of Geographic  
10 Sciences and Natural Resources Research, Chinese Academy of Sciences, Beijing 100101, China

11 <sup>b</sup>Key Laboratory of Tibetan Environmental Changes and Land Surface Processes, Institute of  
12 Tibetan Plateau Research, Chinese Academy of Sciences, Beijing 100101, China

13 <sup>c</sup>CAS Center for Excellent in Tibetan Plateau Earth Sciences, Beijing 100101, China

14 <sup>d</sup>Key Laboratory of Simulation and Regulation of Water Cycle in River Basin, China Institute of  
15 Water Resources and Hydropower Research, Beijing 100038, China

16

17 **Submitted to:** Hydrology and Earth System Sciences

18 **Corresponding Author:** Dr. Fubao Sun ([Sunfb@igsnr.ac.cn](mailto:Sunfb@igsnr.ac.cn)), from the Key Laboratory of Water  
19 Cycle and Related Land Surface Processes, Institute of Geographic Sciences and Natural  
20 Resources Research, Chinese Academy of Sciences (No. A11, Datun Road, Chaoyang District,  
21 Beijing 100101, China)

22 **Email Addresses for other authors:** Wenbin Liu ([liuwb@igsnr.ac.cn](mailto:liuwb@igsnr.ac.cn)), Yanzhong Li  
23 ([liy.14b@igsnr.ac.cn](mailto:liy.14b@igsnr.ac.cn)), Guoqing Zhang ([guoqing.zhang@itpcas.ac.cn](mailto:guoqing.zhang@itpcas.ac.cn)), Yan-fang Sang  
24 ([sangyf@igsnr.ac.cn](mailto:sangyf@igsnr.ac.cn)), Jiahong Liu ([liujh@iwhr.com](mailto:liujh@iwhr.com)), Hong Wang ([wanghong@igsnr.ac.cn](mailto:wanghong@igsnr.ac.cn)),  
25 Peng Bai ([baip.11b@igsnr.ac.cn](mailto:baip.11b@igsnr.ac.cn))

26

27

2016/11/25

28

29 **Highlights**

- 30 ● Monthly basin-wide ET was calculated through water balance considering the  
31 impacts of glacier and water storage change
- 32 | ● Water budget components and trends for 18 river basins over [the](#) TP were  
33 evaluated
- 34 ● Uncertainties were discussed from multiple dataset perspective

35

36 **Abstract.** The ~~insights-dynamics~~ of water budget over ~~the~~ Tibetan Plateau (TP) are  
37 not fully understood so far due to the lack of quantitative observations of the land  
38 surface ~~processes~~water cycle. Here, we investigated the seasonal cycles and trends of  
39 water budget components, e.g., precipitation, runoff and evapotranspiration (ET), in  
40 18 TP basins ~~through the use of~~fusing multi-source datasets during the period  
41 1982-2011. A two-step bias correction procedure was applied to calculate the  
42 basin-wide ~~evapotranspiration (ET) through the water balance~~ considering the  
43 influences of glacier and water storage change. The results indicated that precipitation,  
44 which mainly concentrated during June-October (varied among different monsoons  
45 impacted basins), is the major contributor to the runoff in ~~the~~ TP basins. The  
46 basin-wide snow water equivalent (SWE) was relatively higher from mid-autumn to  
47 spring for most TP basins. The water cycles intensified under a global warming in  
48 most basins except for the upper Yellow and Yalong Rivers, which were significantly  
49 influenced by the weakening East Asian monsoon. ~~Corresponded to~~Consistent with  
50 the climate warming and moistening in the TP and western China, the aridity index  
51 (PET/P) in most basins decreased. ~~The general hydrological regimes could be inferred~~  
52 ~~from the perspective of multi-source datasets although there are considerable~~  
53 ~~uncertainties from different datasets, which are comparable to some existing studies~~  
54 ~~using the field observations and complex modeling approaches.~~ The results  
55 highlighted the usefulness of integrating the multi-source data (e.g., in situ  
56 observations, remote sensing products, reanalysis, land surface model simulations and  
57 climate model outputs) for hydrological applications in the data-sparse ~~environments~~

58 | [regions](#) and could be ~~benefit-beneficial~~ for understanding the water and energy  
59 | budgets, sustainable management of water resources under a warming climate in the  
60 | harsh and [the](#) data-sparse Tibetan Plateau.

61

## 62 | **1 Introduction**

63 | As the highest plateau in the globe (the average elevation is higher than 4000 meters  
64 | above the sea level), [the](#) Tibetan Plateau (TP, also called “the roof of the world” or  
65 | “the third Pole”) is one of the most vulnerable region under a warming climate and is  
66 | subjected to strong interactions among atmosphere, hydrosphere, biosphere and  
67 | cryosphere in the earth system (Duan and Wu, 2006; Yao et al., 2012; Liu W. et al.,  
68 | 2016b). It also serves as the “Asian water tower” ~~with-from which~~ many major Asian  
69 | rivers such as Yellow river, Yangtze river, Brahmaputra river, Mekong river, Indus  
70 | river, etc., originate ~~from, which~~ [It](#) provides a vital water resource to support  
71 | hundreds of millions of people in China and the surrounding countries (Immerzell et  
72 | al., 2010; Zhang et al., 2013). Knowledge about the water budgets and their responses  
73 | to the changing environment is thus crucial for understanding the hydrological  
74 | regimes and for sustainable water resources management as well as environmental  
75 | protection in this special region (Yang et al., 2014; Chen et al., 2015).

76

77 | [The](#) TP is also known as a typical data-sparse mountain region which brings great  
78 | challenges to hydrological and related land surface studies (Zhang et al., 2007; Li F. et  
79 | al., 2013; Liu X. et al., 2016). For example, since the 1950s, totally 750 stations have  
80 | been established over China by the Chinese Meteorological Administration (CMA),  
81 | among which only less than 80 stations are distributed over the plateau (Wang and  
82 | Zeng, 2012). They are primary sparse and unevenly located at relatively low elevation

83 regions, focus only on the meteorological variables and lack of other land surface  
84 observations such as evapotranspiration, snow water equivalent and latent heat fluxes,  
85 etc.. In addition, long-term consecutive observations of river discharge, snow depth,  
86 lake depth and glacier melts in [the TP](#) are also absent (Akhta et al., 2009; Ma et al.,  
87 2016). Therefore, the insights of water balance over various TP river basins ~~locates-~~  
88 [located](#) at different monsoon-dominant regions are, ~~to some extent,~~ still unclear so far  
89 ~~due to the lack of quantitative observations of the land surface processes~~ (Cuo et al.,  
90 2014; Xu et al., 2016). One way to ~~break-~~ [overcome](#) this limitation is to install more  
91 instruments to measure the [point scale in situ](#) water budgets (Yang et al., 2013; Zhou et  
92 al., 2013; Ma et al., 2015), but it is extremely expensive to maintain long-term  
93 observations at ~~the harsh environment and is often difficult to be applied to~~ basin or  
94 regional scales. Another ~~more popular way~~ [workaround](#) is to simulate basin-wide  
95 water budgets through physical-based land surface models at several large river basins  
96 forced with remote sensing data and large-scale gridded meteorological forcing  
97 datasets (Bookhagen and Burbank, 2010; Xue et al., 2013; Zhang et al., 2013; Cuo et  
98 al., 2015; Zhou et al., 2015; Wang et al., 2016). However, [it is still difficult to use land](#)  
99 [surface models to multiple basins especially to the relatively smaller ones under](#)  
100 [complex terrains due to the lack of adequate data for model calibration and validation](#)  
101 [\(Li F. et al., 2014\).](#)  
102 ~~it is also limited by the lack of adequate data for model calibration/validation and is~~  
103 ~~hard to be used to multiple basins especially to relatively smaller basins under the~~  
104 ~~complex terrains (Li F. et al., 2014).~~  
105  
106 ~~In recent years, a~~ number of global (or regional) datasets for water budget  
107 components have been released [recently](#) including remote sensing-based retrievals

108 (Tapley et al., 2004; Zhang et al., 2010; Long et al., 2014; Zhang Y. et al., 2016), land  
109 surface model (LSM) simulations (Rui, 2011), reanalysis outputs (Berrisford et al.,  
110 2011; Kobayashi et al., 2015) and gridded forcing data interpolated from the in situ  
111 observations (Harries et al., 2014). For example, there are [considerable-many](#) products  
112 for terrestrial evapotranspiration (ET) such as GLEAM\_E (Global Land surface  
113 Evaporation: the Amsterdam Methodology, Miralles et al., 2011a), MTE\_E (a product  
114 integrated the point-wise ET observation at FLUXNET sites with geospatial  
115 information extracted from surface meteorological observations and remote sensing in  
116 a machine-learning algorithm, Jung et al., 2010 ), LSM-simulated ETs from Global  
117 Land Data Assimilation System version 2 (GLDAS-2) with different land surface  
118 schemes (Rodell et al., 2004), ETs from Japanese 55-year reanalysis (JRA55\_E), the  
119 ERA-Interim global atmospheric reanalysis dataset (ERA-Interim) and the National  
120 Aeronautic and Space Administration (NASA) Modern Era Retrospective-analysis  
121 for Research and Application (MERRA) reanalysis data (Lucchesi, 2012). Moreover,  
122 there are also several global or regional LSM-based runoff simulations from GLDAS  
123 and the Variable Infiltration Capacity (VIC) model (Zhang et al., 2014). A few  
124 attempts have been made to validate multiple datasets for certain water budget  
125 components and to explore their possible hydrological implications, for example, Li X.  
126 et al. (2014) and Liu W. et al. (2016a) evaluated multiple ET estimates against the  
127 water balance method at annual and monthly time scales. Bai et al. (2016) assessed  
128 streamflow simulations of GLDAS LSMs in five major rivers over [the](#) TP based on  
129 the discharge observations. Although there are certain uncertainties among different  
130 datasets with various spatial and temporal resolutions and calculated [through](#) different  
131 algorithms (Xia et al., 2012), they do provide a great chance for us to quantify the  
132 general basin-wide water budgets and their uncertainties in gauge-sparse regions such

133 | as [the](#) TP considered in this study.

134

135 | The objectives of this study are (1) to investigate the general water budgets in 18 river

136 | basins across [the](#) Tibetan Plateau from the perspective of multiple datasets, and (2) to

137 | evaluate the seasonal cycles and annual trends of water budget components for 18 TP

138 | basins. The paper is organized as follows: the datasets and methods applied in this

139 | study are described in Sect.2. The results of season cycles and annual trends of water

140 | budget components for 18 TP basins are presented and discussed in Sect.3. The

141 | uncertainties inherited from multiple datasets are also discussed. In the Sect.4, we

142 | summarized the general results which would [be](#) helpful for understanding the water

143 | balances of [the](#) TP Rivers located at westerlies-dominated, Indian

144 | monsoon-dominated and East Asian monsoon-dominated regions.

145

## 146 | **2 Data and Method**

### 147 | **2.1 Multiple datasets used**

#### 148 | **2.1.1 Study basins**

149 | Eighteen river basins over [the](#) TP (Fig.1) with the drainage area ranging from 2832 to

150 | 191235 km<sup>2</sup> (Table 1) are chosen in this study due to the availability of runoff data

151 | during the period 1982-2011. They mainly locate at the northwestern, southeastern

152 | and eastern parts of the plateau with multiyear-mean and basin-averaged temperature

153 | and precipitation ranging from -5.68 to 0.97 °C and 128 to 717 mm, which are solely

154 | or combined controlled by the westerlies, the Indian Summer monsoon and the Easter

155 | Asian monsoon (Yao et al., 2012). ~~The altitudes of the lowest and highest~~

156 | ~~hydrological gauging stations are 1650 m and 4982 m above the sea level.~~ The glacier

157 | and snow covers are relatively more for the westerlies-dominant basins such as

158 Yerqiang, Yulongkashi and Keliya (10.86~23.27% and 29.16~35.95%, respectively)  
159 whereas are less for the East Asian monsoon-dominated basins such as Yellow,  
160 Yangtze and Bayin (0~0.96% and 9.42~20.05%, respectively) (Table 1).

161 [<Figure 1, here please, thanks>](#)

162 [<Table 1, here please, thanks>](#)

### 163 2.1.2 Runoff, Precipitation and Terrestrial storage change

164 Observed daily runoff (Q) during the period 1982-2011 ~~used for water balance~~  
165 ~~calculation for 18 TP basins~~ was obtained from the National Hydrology Almanac of  
166 China (Table 2). There are < 30% missing data in some gauging stations such as  
167 Yajiang, Tongren, Gandatan and Zelingou. Therefore, the VIC Retrospective Land  
168 Surface Dataset over China (1952~2012, VIC\_IGSNRR simulated) with a spatial  
169 resolution of 0.25 degree and a daily temporal resolution from the Geographic  
170 Sciences and Natural Resources Research (IGSNRR), Chinese Academy of Sciences,  
171 is also used. ~~This dataset, which~~ is derived from the VIC model forced by the gridded  
172 daily observed forcing (IGSNRR\_forcing) (Zhang et al., 2014). A degree-day scheme  
173 was used in the model to consider the influences of snow and glacier on hydrological  
174 processes. ~~In this study, we first assess the VIC\_IGSNRR simulated runoff against the~~  
175 ~~observations for each basin (for example, at Tangnaihai and Pangduo stations in~~  
176 ~~Fig.2). The VIC\_IGSNRR simulated runoff is acceptable and could be used to replace~~  
177 ~~the missing values for a given basin, if the Nash Efficiency coefficient (NSE) between~~  
178 ~~the observation and simulation is above 0.65.~~

179 [← Figure 2, here please, thanks>](#)

180  
181 Monthly gridded precipitation dataset (0.5 degree, 1961-2011) from CMA, which was  
182 interpolated from observations of 2472 national meteorological stations using the



183 Thin Plate Spline method, was used in this study (Table 2). Considering the  
184 uncertainty of CMA precipitation over [the](#) TP due to the relatively sparse stations [used](#)  
185 and the complex terrain conditions, two other precipitation datasets (IGSNRR\_forcing  
186 and TRMM (Tropical Rainfall Measuring Mission) 3B43 V7, Huffman et al., 2012)  
187 were also [applied](#). The precipitation from IGSNRR forcing datasets (0.25 degree)  
188 was derived by interpolating gauged daily precipitation from 756 CMA stations based  
189 on the synergraphic mapping system algorithm (Shepard, 1984; Zhang et al., 2014)  
190 and was further bias-corrected using the CMA gridded precipitation. ~~The CMA~~  
191 ~~precipitation is perfectly consistent with TRMM (Corr = 0.86, RMSE = 8.34~~  
192 ~~mm/month) and IGSNRR forcing (Corr = 0.94, RMSE = 7.15mm/month)~~  
193 ~~precipitation for multiple basins (and also for the smallest basin above Tongren station,~~  
194 ~~Fig.2), which reveals the applicably of CMA precipitation under the TP conditions.~~

195 <Table 2, here please, thanks>

196 Three latest global terrestrial water storage anomaly and water storage change ( $\Delta S$ )  
197 datasets (available on the GRACE Tellus website: <http://grace.jpl.nasa.gov/>) retrieved  
198 from the Gravity Recovery and Climate Experiment (GRACE, Tapley et al., 2004;  
199 Landerer and Swenson, 2012; Long et al., 2014), which were processed separately at  
200 the Jet Propulsion Laboratory (JPL), the GeoForschungsZentrum (GFZ) and the  
201 Center for Space Research at the University of Texas (CSR), were used. The GRACE  
202 retrievals (2002-2013) from three processing centers were averaged and a glacier  
203 isostatic adjustment correction as well a destriping filter were applied to minimize the  
204 errors and uncertainties of extracted  $\Delta S$ .

205

### 206 **2.1.3 Temperature, potential evaporation and ET**

207 The CMA monthly gridded temperature (0.5 degree) and potential evaporation (PET)

208 dataset (0.5 degree, Harris et al., 2013) from Climatic Research Unit (CRU) in the  
209 University of East Anglia were used in this study. Moreover, six published  
210 global/regional ET products (four diagnostic products and two LSMs simulations,  
211 Table 2), namely (1) GLEAM\_E (Miralles et al., 2010, 2011), which estimated three  
212 sources of ET (transpiration, soil evaporation and interception) separately through  
213 bare soil, short vegetation and vegetation with a tall canopy through a set of algorithm  
214 ([www.gleam.eu](http://www.gleam.eu)), (2) GNoah\_E simulated by GLDAS-2 with the Catchment Noah  
215 scheme (<http://disc.sci.gsfc.nasa.gov/hydrology/data-holdings>) (Rodell et al., 2004),  
216 (3) Zhang\_E (Zhang et al., 2010) estimated using the modified Penman-Monteith  
217 approach forced with MODIS data, satellite-based vegetation parameters and  
218 meteorological observations (<http://www.ntsg.umt.edu/project/et>), (4) MET\_E (Jung  
219 et al., 2010) (<https://www.bgc-jena.mpg.de/geodb/projects/Home.phs>), (5) VIC\_E  
220 (Zhang et al., 2014) from VIC\_IGSNRR simulations  
221 ([http://hydro.igsnr.ac.cn/public/vic\\_outputs.html](http://hydro.igsnr.ac.cn/public/vic_outputs.html)) and (6) PML\_E (Zhang Y. et al.,  
222 2016) computed from global observation-driven Penman-Monteith-Leuning (PML)  
223 model (<https://data.csiro.au/dap/landingpage?pid=csiro:17375&v=2&d=true>).

224

#### 225 **2.1.4 Vegetation and snow/glacier parameters**

226 ~~Two vegetation parameter datasets, t~~The Normalized Difference Vegetation Index  
227 (NDVI) and the Leaf Area Index (LAI) were used to quantify the dynamics of  
228 vegetation for 18 TP basins (Table 2). The NDVI data was obtained from the Global  
229 Inventory Modeling and Mapping Studies (GIMMS) (Turker et al., 2005)  
230 ([https://nex.nasa.gov/nex/projects/1349/wiki/general\\_data\\_description\\_and\\_access/](https://nex.nasa.gov/nex/projects/1349/wiki/general_data_description_and_access/))

231 while the LAI data was collected from the Global Land Surface Satellite (GLASS)  
232 products (<http://www.glcfc.umd.edu/data/lai/>) (Liang and Xiao, 2012). Seasonal snow  
233 and glacier are widespread over the plateau which significantly influences the water  
234 and energy budgets in [the](#) TP, but their observations are difficult due to the harsh  
235 environment, especially at the basin scale. However, there are currently a few  
236 satellite-based or LSM-simulated products which could provide general information  
237 about the variations of snow and glacier. The daily cloud free snow composite product  
238 from MODIS Terra-Aqua and the Interactive Multisensor Snow and Ice Mapping  
239 System for the Tibetan Plateau was applied to quantify the snow cover changes for  
240 each basin (Zhang et al., 2012; Yu et al., 2015). The snow water equivalent (SWE)  
241 retrieved from Global Snow Monitoring for Climate Research product (GlobSnow-2,  
242 <http://www.globsnow.info/>) and the VIC\_IGSNRR simulations were also used in this  
243 study (Takala et al., 2011; Zhang et al., 2014). Moreover, the Second Glacier  
244 Inventory Dataset of China was used to extract the general distribution of glacier  
245 (Guo et al., 2014). All gridded datasets used were first uniformly interpolated to a  
246 spatial resolution of 0.5 degree [based on the bilinear interpolation](#) to make their  
247 inter-comparison possible. The datasets were then extracted for each of TP basins.

248

### 249 **2.1.5 Monsoon indices**

250 The TP climate is generally influenced by the westerlies, Indian summer monsoon and  
251 East Asian summer monsoon (Yao et al., 2012). To investigate the changes of  
252 monsoon systems and their potential influences on the water budget in [the](#) TP basins,  
253 three monsoon indices, namely Asian Zonal Circulation Index (AZCI), Indian Ocean  
254 Dipole Mode Index (IODMI) and East Asian Summer Monsoon Index (EASMI), are  
255 ~~also~~ used in this study. The IODMI is an indicator of the east-west temperature

256 gradient across the tropical Indian Ocean defined by Saji et al. (1999), which can be  
257 downloaded from the following website:  
258 [http://www.jamstec.go.jp/frcgc/research/d1/iod/HTML/Dipole%20Mode%20Index.ht](http://www.jamstec.go.jp/frcgc/research/d1/iod/HTML/Dipole%20Mode%20Index.html)  
259 [ml](http://www.jamstec.go.jp/frcgc/research/d1/iod/HTML/Dipole%20Mode%20Index.html). The EASMI and AZCI (60°-150°E) reflect the dynamics of East Asian summer  
260 monsoon (Li and Zeng, 2002) and the westerlies, which can be obtained from the  
261 <http://ljp.gcess.cn/dct/page/65577> and the National Climate Center of China  
262 (<http://ncc.cma.gov.cn/Website/index.php?ChannelID=43WCHID=5>), respectively.

## 263 2.2 Methods

### 264 2.2.1 Water balance-based ET estimation

265 ~~In this study, we first assess the VIC IGSNRR simulated runoff against the~~  
266 ~~observations for each basin (for example, at Tangnaihai and Pangduo stations in~~  
267 ~~Fig.2). The VIC IGSNRR simulated runoff is acceptable and could be used to replace~~  
268 ~~the missing values for a given basin, if the Nash Efficiency coefficient (NSE) between~~  
269 ~~the observation and simulation is above 0.65.~~

带格式的：居中

270  
271 The basin-wide water balance at the monthly and annual timescales could  
272 ~~traditionally~~ be written as the principle of mass conservation (also known as the  
273 continuity equation, Oliverira et al., 2014) of basin-wide precipitation (P, mm),  
274 evapotranspiration ( $ET_{wb}$ , mm), runoff (Q, mm) as well as terrestrial water storage  
275 change ( $\Delta S$ , mm),

$$276 \quad ET_{wb} = P - Q - \Delta S \quad (1)$$

277 In most TP basins, glacier melt ( $M_G$ , mm) contributes to river discharge together with  
278 precipitation (liquid precipitation and snow). The monthly and annual water balance  
279 in these basins can thus be revised as,

$$280 \quad ET_{wb} = P + M_G - Q - \Delta S \quad (2)$$

281 Several attempts have been made for separating glacier contributions to river  
282 discharge through site-scale isotopic observations, remote sensing as well as  
283 land-surface hydrological modeling for some individual TP basins (Zhang et al., 2013;  
284 Zhou et al., 2014; Neckel et al., 2014; [Xiang et al., 2016](#)). However, accurate  
285 quantification of  $M_G$  is difficult in [the](#) data-sparse TP, especially for multiple basins.  
286 In this study, we simply use the percentages of glacier melt to river discharge for  
287 some TP basins ~~concluded-derived~~ from the ~~existing-studies~~[literatures](#) (Chen, 1988;  
288 Mansur and Ajnis, 2005; Zhang et al., 2013; Liu J. et al., 2016) and the empirical  
289 relations between the glacier area ratio (%) and glacier melt in basins mentioned  
290 above (Table 3).

291 [<Table 3, here please, thanks>](#)

292 The terrestrial water storage ( $\Delta S$ ) in Eq.(2), which includes the surface, subsurface  
293 and ground water changes, cannot be neglected in water balance calculation at a  
294 monthly or annual timescale due to snow accumulation and some anthropogenic  
295 interferences such as reservoir regulation and agriculture irrigation (Liu W. et al.,  
296 2016a). The water balance-based ET ( $ET_{wb}$ ) during 2002-2011 can be calculated  
297 through Eq. (2) using the GRACE-derived mass anomaly as  $\Delta S$ . For  $ET_{wb}$   
298 calculation before 2002 when the GRACE data is unavailable, we use a two-step bias  
299 correction procedure (Li X. et al., 2014) to close the water balance ~~for 18 basins~~ at  
300 monthly timescale considering the  $\Delta S$ . We define  $P + M_G - Q$  as biased ET  
301 ( $ET_{biased}$ , available from 1982-2011) relative to the  $ET_{wb}$  (available from 2002-2011  
302 when the GRACE data is available) calculated from Eq. (2). Firstly, the  $ET_{biased}$  and  
303  $ET_{wb}$  series over the period 2002-2011 were separately fitted using a gamma  
304 distribution, which has been evidenced as an proper method for modeling the  
305 probability distribution of ET (Bouraoui et al., 1999). The value in monthly  $ET_{biased}$

306 series (2002-2011) can be bias-corrected through the inverse function ( $F^{-1}$ ) of the  
307 gamma cumulative distribution function (CDF,  $F$ ) of  $ET_{wb}$  by matching the  
308 cumulative probabilities between two CDFs as follow (Liu W. et al., 2016a),

$$309 \quad ET_{wb}(m) = F^{-1}(F(ET_{biased}(m)|\alpha_{biased}, \beta_{biased})|\alpha_{wb}, \beta_{wb}) \quad (3)$$

310 Here  $\alpha_{biased}$ ,  $\beta_{biased}$ ,  $\alpha_{wb}$  and  $\beta_{wb}$  are the shape and scale parameters of gamma  
311 distribution for  $ET_{biased}$  and  $ET_{wb}$ . The second step is to eliminate the annual bias  
312 through the ratio of annual  $ET_{biased}$  to annual  $ET_{wb}$  calculated in the first step using  
313 the following method,

$$314 \quad ET_{wb}(m) = \frac{ET_{biased}(a)}{ET_{wb}(a)} \times ET_{wb}(m) \quad (4)$$

315 The procedure was then applied to correct the monthly  $ET_{biased}$  series and calculated  
316 the monthly  $ET_{wb}$  during the period 1982-2001 for all TP basins. The  $ET_{wb}$  obtained  
317 was seemed as the “true” ET for evaluating multiple ET products and further for the  
318 trend analysis.

### 319 2.2.2 Modified Mann-Kendall test method

320 The Mann-Kendall (MK) test is a rank-based nonparametric approach ~~and which~~ is  
321 less sensitive to outlier relative to other parametric statistics. ~~However, it is, but~~  
322 ~~sometimes it is sometimes impacted-influenced~~ by the serial correlation of time series.  
323 Pre-whitening is often used to eliminate the influence of lag-1 autocorrelation before  
324 the use of MK test, for example, in pre-whitening, the analyzed time series  
325  $(X_1, X_2, \dots, X_n)$  will be replaced by  $(X_2 - cX_1, X_3 - cX_2, \dots, X_{n+1} - cX_n)$  if the lag-1  
326 autocorrelation coefficient ( $c$ ) is larger than 0.1 (von Storch, 1995). However,  
327 significant lag- $i$  autocorrelation may still be detected after pre-whitening because only  
328 the lag-1 autocorrelation is considered in pre-whitening (Zhang et al., 2013).  
329 Moreover, it sometimes underestimate the trend for a given time series (Yue et al.,  
330 2002). Hamed and Rao (1998) proposed a modified version of MK test (MMK) to

带格式的：字体：非倾斜

带格式的: 字体: 非倾斜

带格式的: 字体: 非倾斜

331 consider the lag- $j$  autocorrelation and related robustness of the autocorrelation through  
332 the use of equivalent sample size, which ~~has been widely used in previous studies~~  
333 ~~during the last five decades (McVicar et al., 2012; Zhang et al., 2013; Liu and Sun,~~  
334 ~~2016).~~

335 In the MMK approach, if the lag- $j$  autocorrelation coefficients are significantly  
336 distinct from zero, the original variance of MK statistics will be replaced by the  
337 modified one. ~~In this study, we used a modified version of MK test (MMK, Hamed~~  
338 ~~and Rao, 1998)the MMK approach to quantify the trends of water budget components~~  
339 ~~in 18 TP basins. and the significance of trend was tested at the >95% confidence~~  
340 ~~level. The MMK considers the lag- $i$  autocorrelation and related robustness of the~~  
341 ~~autocorrelation, which has been widely used in previous studies during the last five~~  
342 ~~decades (McVicar et al., 2012; Liu and Sun, 2016).~~

### 344 **3 Results and Discussion**

#### 345 **3.1 ET evaluation and General hydrological characteristics of 18 TP basins**

346 In this study, we first assess the VIC\_IGSNRR simulated runoff against the  
347 observations for each basin (for example, at Tangnaihaid and Pangduo stations in  
348 Fig.2). The VIC\_IGSNRR simulated runoff is acceptable and could be used to replace  
349 the missing values for a given basin, if the Nash Efficiency coefficient (NSE) between  
350 the observation and simulation is above 0.65. Moreover, the CMA precipitation is  
351 consistent with TRMM (Corr = 0.86, RMSE = 8.34 mm/month) and IGSNRR forcing  
352 (Corr = 0.94, RMSE = 7.15mm/month) precipitation for multiple basins (and also for  
353 the smallest basin above Tongren station, Fig.2), which reveals the applicability of CMA  
354 precipitation under the TP conditions.

355 < Figure 2, here please, thanks >

356 We ~~first then~~ evaluated ~~monthly performances of~~ six ET products in 18 TP basins  
357 against ~~the our calculated~~  $ET_{wb}$  ~~at a monthly basis, which was calculated through~~  
358 ~~water balance considering the impacts of glacier and water storage change~~ (Fig. 3).  
359 The ranges of monthly averaged ET among different basins (approximately 4–39 mm  
360 month<sup>-1</sup>) are very close for all products compare with that calculated from the  
361  $ET_{wb}$  (6–42 mm month<sup>-1</sup>). However, GLEAM\_E (correlation coefficient: Corr = 0.85  
362 and root-mean-square-error: RMSE = 5.69 mm month<sup>-1</sup>) and VIC\_E (Corr = 0.82 and  
363 RMSE = 6.16 mm month<sup>-1</sup>) perform relatively better than others. Although Zhang\_E  
364 and GNoah\_E were found closely correlated to monthly  $ET_{wb}$  in the upper Yellow  
365 River, the upper Yangtze River, Qiangtang and Qaidam basins (Li X. et al., 2014),  
366 they did not exhibit overall good performances (Corr = 0.61, RMSE = 7.97 mm  
367 month<sup>-1</sup> for Zhang\_E and Corr = 0.42, RMSE = 10.16 mm month<sup>-1</sup> for GNoah\_E) for  
368 18 TP basin used in this study. We thus use GLEAM\_E and VIC\_E together with  
369  $ET_{wb}$  to calculate the seasonal cycles and trends of ET in 18 TP basins in the  
370 following sections.

371 < Figure 3, here please, thanks >

372 To investigate the general hydroclimatic characteristics of rivers over ~~the~~ TP, we  
373 classify 18 basins into three categories, namely westerlies-dominated basins  
374 (Yerqiang, Yulongkashi and Kelia), Indian monsoon-dominated basins (Brahmaputra  
375 and Salween), and East Asian monsoon-dominated basins (Yellow, Yalong and  
376 Yangtze) referred to Tian et al. (2007) ~~and~~ Yao et al. (2012, ~~2013~~) ~~and~~ Dong et al.  
377 (2016). Interestingly, they are clustered into three groups under ~~the perspective of~~  
378 Budyko framework (Budyko, 1974; Zhang D. et al., 2016) with relatively lower  
379 evaporative index for Indian monsoon-dominant basins and higher aridity index for  
380 westerlies-dominant basins, which reveal various long-term hydroclimatologic



381 conditions (Fig. 4). Overall, the annual mean air temperature increases (-5.68 ~0.97 °C)  
382 while multiyear mean glacier area (and thus the glacier melt normalized by  
383 precipitation) decreases (23.27 ~ 0%) gradually from the westerlies-dominant, Indian  
384 monsoon-dominant to East Asian monsoon-dominant basins. The vegetation status  
385 (NDVI range: 0.05~0.43; LAI range: 0.03~0.83) tends to be better and ET increases  
386 (and thus runoff coefficient gradually decreases) from cold to warm basins (Fig. 4 and  
387 Table 1). The  $R^2$  between basin-averaged NDVI and ET is 0.76 which shows a clear  
388 vegetation control on ET in 18 TP basins. The result is in line with Shen et al. (2015),  
389 which indicated that the spatial pattern of ET trend was significantly and positively  
390 correlated with NDVI trend over the TP. It is a general picture of hydrological regime  
391 in high-altitude and cold regions (Zhang et al., 2013; Cuo et al., 2014), which could  
392 be interpreted from the perspective of multi-source datasets in the data-sparse TP.

带格式的：上标

393 < Figure 4, here please, thanks >

### 394 **3.2 Seasonal cycles of basin-wide water budget components for the TP basins**

395 The multi-year means of water budget components (i.e., P, Q, ET, snow cover and  
396 SWE) and vegetation parameters (i.e., NDVI and LAI) were calculated for each  
397 calendar month and for 18 TP river basins ~~over~~ using multi-source datasets available  
398 from 1982 to 2011. Overall, the seasonal variations of P, Q, ET, air temperature and  
399 vegetation parameters are similar in all TP basins with peak values occurred in May to  
400 September (Fig.5 and Fig.6). The seasonal cycles of snow cover and SWE are  
401 generally time consistent as well for 18 TP basins (the peak values mainly occur from  
402 October to next April, Fig.7). With the ascending air temperature from cold to warm  
403 months, the basin-wide precipitation increases and vegetation turns green gradually  
404 (the basin-wide ET also increase). Meanwhile, glacier and snow melt or vanish  
405 gradually with the melt water supply the river discharge together with precipitation.

406 The inter-basin variations of hydrological regime are to a large extent linked to the  
407 climate systems that prevail over the TP.

408 [< Figure 5, here please, thanks>](#)

409 Although the temporal patterns of hydrological components are general analogous,  
410 they varied among parameters, climate zones and even basins (Zhou et al., 2005). For  
411 example, relative to air temperature, the seasonal variation of runoff is more similar to  
412 precipitation which reveals that runoff is mainly controlled by precipitation in ~~the~~  
413 [most](#) TP basins. It is in agreement with that summarized by Cuo et al. (2014). In the  
414 westerlies-dominated basins, the peak values of precipitation and runoff mainly  
415 concentrate in June-August, which contribute approximately 68-82% and 67-78% of  
416 annual totals, respectively. During this period, the runoff always exceeds precipitation  
417 which indicates large contributions of [glacier/snow](#)-melt water to streamflow. It is  
418 consistent with the existing findings in Tarim River (Yerqiang, Yulongkashi and  
419 Keliya rivers are the major tributaries of Tarim River), which indicated that the melt  
420 water accounted for about half of the annual total streamflow (Fu et al., 2008). The  
421 ET (vegetation cover) in three westerlies-dominated basins are relatively less (scarcer)  
422 than that in other TP basins while the percentages of glacier and seasonal snow cover  
423 are higher in these basins which contribute more melt water to river discharge (Fig.6  
424 and Fig.7). Overall, the SWE in Yerqiang, Yulongkashi and Keliya rivers are  
425 relatively higher in winter than other seasons, but they vary with basins and products  
426 which reveal considerable uncertainties in SWE estimations.

427 [< Figure 6, here please, thanks>](#)

428 In the Indian monsoon and East Asian monsoon-dominated basins, the runoff  
429 concentrates during June-September (~~or June-June~~ October) with precipitation being  
430 the dominant contributor of annual total runoff. For example, the peak values of

431 precipitation and runoff occur during June-September at Zhimenda station  
432 (contributing about 80% and 74% of the annual totals) while those occur during  
433 June-October at Tangnaihai station (contributing about 78% and 71% of the annual  
434 totals, respectively). The results are quite similar to the related studies in eastern and  
435 southern TP such as Liu (1999), Dong et al. (2007), Zhu et al. (2011), Zhang et al.  
436 (2013), Cuo et al. (2014). The vegetation cover (ET) in most basins is relatively better  
437 (higher) than that in the westerlies-dominant basins. Moreover, the seasonal snow  
438 mainly covers from mid-autumn to spring and correspondingly the SWE is relatively  
439 higher in these months in all basins except for Yellow River above Xining station,  
440 Salwee River above Jiayuqiao station and Brahmaputra River above Nuxia and  
441 Yangcun stations.

442 [< Figure 7, here please, thanks >](#)

### 443 **3.3 Trends of basin-wide water budget components for the TP basins**

444 Trends in water budget components for 18 TP basins during the period 1982-2011  
445 were also examined through the modified Mann-Kendall test (MMK) in this study.  
446 The hydrological cycles intensified in the westerlies-dominated basins with Q, P and  
447  $ET_{wb}$  all ascended with regional warming (Fig.8), especially in the Keliya River  
448 basin (Numaitilangan station). The aridity index (PET/P), which is an indicator for the  
449 degree of dryness, slightly declined in all basins in northwestern TP. Although P and  
450 PET were found both increase since the 1980s~~The results were in line with the overall~~  
451 ~~climate warming and moistening reported in northwest China~~ (Shi et al., 2003; Yao et  
452 al., 2014), at which these basins located, the declined PET/P is, to some extent,  
453 attributed to the ascending P exceed the increase in PET for these basins (except for  
454 the Yulongkashi basin). The climate moistening in the headwaters of these inland  
455 rivers would be beneficial to the water resources and oasis agro-ecosystems in the

456 | [middle and lower basins.](#) –The increase in streamflow was also found in most  
457 | tributaries of the Tarim River (Sun et al., 2006; Fu et al., 2010; Mamat et al., 2010).  
458 | Moreover, the westerlies, revealed by the Asian Zonal Circulation Index (60°-150° E),  
459 | [slightly](#) enhanced (linear trend: 0.21) over the period of 1982-2011 (Fig.9). More  
460 | water vapor was transported and fell as precipitation or snow in northwestern TP (e.g.,  
461 | the eastern Pamir region) with the strengthening westerlies. [Both SWE products](#)  
462 | [\(VIC\\_IGSNRR simulated and GlobaSnow-2 product\) showed slightly increase for all](#)  
463 | [basins](#)~~The SWE showed increase for all basins and for both products (VIC\_IGSNRR-~~  
464 | ~~simulated and GlobaSnow-2 product)~~ with the incremental seasonal snow cover and  
465 | advanced glaciers (Yao et al., 2012). More precipitation was transformed into snow or  
466 | glacier and the runoff coefficient (Q/P) exhibited decrease although precipitation  
467 | obviously increased (Fig.8). In addition, the transpiration in these basins may decrease  
468 | with vegetation degradation revealed by the NDVI and LAI (Yin et al., 2016) but the  
469 | atmospheric evaporative demand indicated by CRU PET increased (significantly  
470 | increase in the Yulongkashi and Keliya rivers) during the period 1982-2011.

471 | [< Figure 8, here please, thanks>](#)

472 | [< Figure 9, here please, thanks>](#)

473 | In the East Asian monsoon-dominated basins, there are two types of change for  
474 | basin-wide water budget components. For example, P and Q [slightly](#) decreased in the  
475 | upper Yellow River (Tangnihai, Huangheyuan and Jimai stations) and Yalong River  
476 | (Yajiang station) but increased in other basins (Zelingou, Gandatan, Xining, Tongren  
477 | and Zhimenda stations) over the period of 1982-2011 (Fig.10). The decline in Q and P  
478 | for the upper Yellow and Yalong Rivers (locate at [the](#) eastern Tibetan Plateau) were  
479 | consistent with that found by Cuo et al. (2013, 2014) as well as Yang et al. (2014), and  
480 | were in line with the weakening (linear slope: -0.01) of the East Asian Summer

481 Monsoon (Fig.9). The vegetation turned green while  $ET_{wb}$  and PET increased in all  
482 | nine basins with the [significantly](#) ascending air temperature during the period  
483 | 1982-2011. The aridity index (PET/P) was found decrease in all basins except for the  
484 | upper Yellow River basin above Jimai station and the upper Yalong River basin above  
485 | Yajiang station. Moreover, ~~the both the~~ runoff coefficients [and SWE \(SWE\)](#) were  
486 | decrease (~~decrease~~ except for the Bayin River above Zelingou station and the upper  
487 | Yellow River above Tongren station) in the East Asian monsoon dominated basins.

488 | [< Figure 10, here please, thanks >](#)

489 The hydrological cycles were also found intensified in the Indian monsoon-dominated  
490 basins such as Salween River and Brahmaputra River (Fig.11), which were in line  
491 | with the strengthen (linear trend: 0.~~000601~~) of the Indian Summer monsoon (revealed  
492 | by the Indian Ocean Dipole Mode Index) during the specific period 1982-2011 (Fig.9).

493 In the six basins, trends in P, Q and  $ET_{wb}$  were all upward. For example, at  
494 | Jiayuqiao station, the annual streamflow showed [slightly](#) increasing trend which was  
495 | consistent with that examined during 1980-2000 by Yao et al. (2012). The vegetation  
496 | status, revealed by NDVI and LAI, turned better [significantly](#) with the ascending air  
497 | temperature. The aridity index (PET/P) decreased in all basins except for the  
498 | Brahmaputra River above Tangjia station, which indicated that most basins in the  
499 | Indian monsoon-dominated regions turn wet over the period of 1982-2011. The runoff  
500 | coefficient (Q/P) increased at Gongbujiangda and Nuxia while decreased at Jiayuqiao,  
501 | Pangduo, Tangji and Yangcun stations. Moreover, the basin-wide SWE declined in the  
502 | upper Salween River and Brahmaputra River above Pangduo, Tangjia and  
503 | Gongbujiangda stations while increased in Brahmaputra River above Nuxia and  
504 | Yangcun stations.

505 | [< Figure 11, here please, thanks >](#)

506 **3.4 Uncertainties**

507 The results may unavoidably associate with several aspects of uncertainties which  
508 mainly inherited from the multi-source datasets used. For example, although the  
509 seasonal cycles of  $ET_{wb}$  can be captured by GLEAM\_E and VIC\_E, they still have  
510 considerable uncertainties such as at Numaitilangan, Gongbujiangda and Nuxia  
511 stations (Fig.5). With respect to the annual trend of  $ET_{wb}$  (Table 4), most ET products  
512 (including the well-performed GLEAM\_E and VIC\_E in some basins) cannot detect  
513 the decreasing trends in 7 out of 18 basins (at Kulukelangan, Tongguziluo, Xining,  
514 Tongren, Jimai, Nuxia and Gongbujiangda stations). We thus only used  $ET_{wb}$  in the  
515 trend detection of water budget components in Fig.8, Fig.10 and Fig.11 in this study.  
516 The two SWE products also showed large uncertainty, with respect to both their  
517 seasonal cycles and trends due to their different forcing data; different algorithms  
518 applied as well as varied spatial-temporal resolutions. Moreover, the interpolation of  
519 missing values of runoff with VIC\_IGSNRR simulated runoff and the gridded  
520 precipitation data (which interpolated from limited gauged precipitation over the  
521 plateau) involved some uncertainties as well as. [Finally, we obtained the contributions](#)  
522 [of glacier-melt to discharge in some basins from the literatures and took them as fixed](#)  
523 [numbers. It may inherit considerable uncertainty from varied studies using different](#)  
524 [approaches such as glacier mass-balance observation, isotope observation and](#)  
525 [hydrological modeling, and the contribution rates would also change under a warming](#)  
526 [climate. However, accurate quantification of the contribution of glacier-melt to](#)  
527 [discharge is technically difficult nowadays, especially for the data-sparse basins.](#)  
528 [However, w](#)With these caveats, we can interpret the general hydrological regimes and  
529 their responses to the changing climate in [the](#) TP basins from solely the perspective of  
530 multi-source datasets, which are comparable to the existing studies based on the in

531 situ observations and complex hydrological modeling.

532 [<Table 4, here please, thanks>](#)

#### 533 **4 Summary**

534 In this study, we investigated the seasonal cycles and trends of water budget  
535 components in 18 TP basins during the period 1982-2011, which is not well  
536 understood so far due to the lack of adequate observations in the harsh environment,  
537 through integrating the multi-source global/regional datasets such as gauge data,  
538 satellite remote sensing and land surface model simulations. By using a two-step bias  
539 correction procedure, annual basin-wide  $ET_{wb}$  was calculated through the water  
540 balance considering the impacts of glacier and water storage change. The GLEAM\_E  
541 and VIC\_E were found perform better relative to other products against the  
542 calculated  $ET_{wb}$ .

543

544 The general water and energy budgets were different in the westerlies-dominated  
545 (with higher aridity index, runoff coefficient and glacier cover), the Indian  
546 monsoon-dominated and the East Asian monsoon-dominated (with higher air  
547 temperature, vegetation cover and evapotranspiration) basins under the perspective of  
548 Budyko framework. In 18 TP basins, precipitation is the major contributor to the river  
549 runoff, which concentrates mainly during June-October (June-August for the  
550 westerlies-dominated basins, June-September or June to October for the Indian  
551 monsoon-dominated and the East Asian monsoon-dominated basins). The basin-wide  
552 SWE is relatively higher from mid-autumn to spring for all 18 TP basins except for  
553 Keliya River and Brahmaputra River above the Nuxia and Yangcun stations. The  
554 vegetation cover is relatively less whereas snow/glacier cover is more in the  
555 westerlies-dominant basins compared with other basins. The hydrological cycles were

556 found intensified under the regional warming in most TP basins except for most  
557 tributaries of the upper Yellow River and the Yalong River, which were significantly  
558 influenced by the weakening East Asian monsoon during the period 1982-2011. The  
559 aridity index (PET/P) exhibited decrease in most TP basins which corresponded to the  
560 warming and moistening climate in the TP and western China. Moreover, the runoff  
561 coefficient (Q/P) declined in most basins which may be, to some extent, due to ET  
562 increase induced by vegetation greening and the influences of snow and glacier  
563 changes. Although there are considerable uncertainties inherited from multi-source  
564 data used, the general hydrological regimes in [the](#) TP basins could be revealed, which  
565 are consistent to the existing results obtained from in situ observations and complex  
566 land surface modeling. It indicated the usefulness of integrating the multiple datasets  
567 available such as in situ observations, remote sensing-based products, reanalysis  
568 outputs, land surface model simulations and climate model outputs for hydrological  
569 applications. The results obtained could be helpful for understanding the hydrological  
570 [cycles,cycles](#) and further for the water resources management and eco-environment  
571 protection under a warming climate in the vulnerable Tibetan Plateau.

572

573 **Author contributions.** Wenbin Liu and Fubao Sun developed the idea to see the  
574 general water budgets in [the](#) TP basins from the perspective of multisource datasets.  
575 Wenbin Liu collected and processed the multiple datasets with the help of Yanzhong  
576 Li, Guoqing Zhang, Hong Wang as well as Peng Bai, and prepared the manuscript.  
577 The results were extensively commented and discussed by Fubao Sun, Jiahong Liu  
578 and Yan-Fang Sang.

579

580 **Acknowledgements.** This study was supported by the National Key Research and  
581 Development Program of China (2016YFC0401401 and 2016YFA0602402),National



582 Natural Science Foundation of China (41401037 and 41330529), the Open Research  
583 Fund of State Key Laboratory of Desert and Oasis Ecology in Xinjiang Institute of  
584 Ecology and Geography, Chinese Academy of Sciences (CAS), the CAS Pioneer  
585 Hundred Talents Program (Fubao Sun), the Initial Founding of Scientific Research  
586 (Y5V50019YE) and the program for the “Bingwei” Excellent Talents from the  
587 Institute of Geographic Sciences and Natural Resources Research, CAS. We are  
588 grateful to the NASA MEaSUREs Program (Sean Swenson) for providing the  
589 GRACE land data processing algorithm. The basin-wide water budget series in [the TP](#)  
590 Rivers used in this study are available from the authors upon request  
591 ([liuwb@igsnr.ac.cn](mailto:liuwb@igsnr.ac.cn)). [We wish to thank the editors and reviewers for their invaluable](#)  
592 [comments and constructive suggestions to improve the quality of the manuscript.](#)  
593

## 594 **References**

- 595 Akhtar, M., Ahmad, N., and Booij, M.J.: Use of regional climate model simulations as input for  
596 hydrological models for the Hindukush-Karakorum-Himalaya region, *Hydrol. Earth Syst. Sci.*  
597 13, 1075-1089, 2009.
- 598 Bai, P., Liu, X.M., Yang, T.T., Liang, K., and Liu, C.M.: Evaluation of streamflow simulation  
599 results of land surface models in GLDAS on the Tibetan Plateau, *J. Geophys. Res. Atmos.*, 121,  
600 12180-12197, 2016.
- 601 Berrisford, P, Lee, D., Poli, P., Brugge, R., Fielding, K., Fuentes, M., Kallberg, P., Kobayashi, S.,  
602 Uppala, S., and Simmons, A.: The ERA-interim archive. ERA Reports Series No. 1 Version 2.0,  
603 Available from: [https://www.researchgate.net/publication/41571692\\_The\\_ERA-interim](https://www.researchgate.net/publication/41571692_The_ERA-interim_archive)  
604 [archive](#)-, 2011.
- 605 Bookhagen, B. and Burbank, D.W.: Toward a complete Himalayan hydrological budget:  
606 spatiotemporal distribution of snowmelt and rainfall and their impact on river discharge, *J.*  
607 *Geophys. Res.*, 115, F03019, 2010.
- 608 Bouraoui, F., Vachaud, G., Li, L.Z.X., LeTreut, H., and Chen, T.: Evaluation of the impact of

609 climate changes on water storage and groundwater recharge at the watershed scale, *Clim. Dyn.*,  
610 15(2), 153-161, 1999.

611 Budyko, M.I.: *Climate and life*. Academic Press, 1974.

612 Chen, D., Xu, B., Yao, T., Guo, Z., Cui, P., Chen, F., Zhang, R., Zhang, X., Zhang, Y., Fan, J., Hou,  
613 Z., and Zhang, T.: Assessment of past, present and future environmental changes on the Tibetan  
614 Plateau, *Chinese SCI. Bull.*, 60(32), 3025-3035, 2015 (in Chinese).

615 Chen, J.: Lichenometrical studies on glacier changes during the Holocene Epoch at the sources  
616 region of Urumqi River, *Sci. China B.*, 18(1), 95-104, 1988 (in Chinese).

617 Cuo, L., Zhang, Y.X., Bohn, T.J., Zhao, L., Li, J.L., Liu, Q.M., and Zhou, B.R.: Frozen soil  
618 degradation and its effects on surface hydrology in the northern Tibetan Plateau, *J. Geophys.*  
619 *Res. Atmos.*, 120(6), 8276-8298, 2015.

620 Cuo, L., Zhang, Y.X., Gao, Y., Hao, Z., and Cairang, L.: The impacts of climate change and land  
621 cover/use transition on the hydrology in the upper Yellow River Basin, China, *J. Hydrol.*, 502,  
622 37-52, 2013.

623 Cuo, L., Zhang, Y.X., Zhu, F.X., and Liang, L.Q.: Characteristics and changes of streamflow on  
624 the Tibetan Plateau: A review, *J. Hydrol. Reg. stud.*, 2, 49-68, 2014.

625 Dong, X., Yao, Z., and Chen, C.: Runoff variation and responses to precipitation in the source  
626 regions of the Yellow River, *Resour. Sci.*, 29(3), 67-73, 2007 (in Chinese).

627 [Dong, W., Lin, Y., Wright, J.S., Ming, Y., Xie, Y., Wang, B., Luo, Y., Huang, W., Huang, J., Wang,](#)  
628 [L., Tian, L., Peng, Y., and Xu, F.: Summer rainfall over the southwestern Tibetan Plateau](#)  
629 [controlled by deep convection over the Indian Subcontinent, \*Nat. Commun.\*, 7, 10925, 2016.](#)

630 Duan, A.M. and Wu, G.X.: Change of cloud amount and the climate warming on the Tibetan  
631 Plateau, *Geophys. Res. Lett.*, 33, L22704, 2006.

632 Fu, L., Chen, Y., Li, W., Xu, C., and He, B.: Influence of climate change on runoff and water  
633 resources in the headwaters of the Tarim River, *Arid Land Geogr.*, 31(2), 237-242, 2008 (in  
634 Chinese).

635 Fu, L., Chen, Y., Li, W., He, B., and Xu, C.: Relation between climate change and runoff volume  
636 in the headwaters of the Tarim River during the last 50 years., *J. Desert Res.*, 30(1), 204-209,  
637 2010 (in Chinese).

638 Guo, W.Q., Liu, S.Y., Yao, X.J., Xu, J.L., Shangguan, D.H., Wu, L.Z., Zhao, J.D., Liu, Q., Jiang,  
26 / 55

639 Z.L., Wei, J.F., Bao, E.J., Yu, P.C., Ding, L.F., Li, G., Ge, C.M., and Wang, Y.: The Second  
640 Glacier Inventory Dataset of China, Cold and Arid Regions Science Data Center at Lanzhou,  
641 doi: 10.3972/glacier.001.2013.db, 2014.

642 Hamed, K.H. and Rao, A.R.: A modified Mann-Kendall trend test for autocorrelation data,  
643 *J.Hydrol.*, 204(1-4), 182-196, 1998.

644 Huffman, G.J., , E.F., Bolvin, D.T., Nelkin, E.J., and Adler, R.F.: last updated 2013: TRMM  
645 Version 7 3B42 and 3B43 Data Sets, NASA/GSFC, Greenbelt, MD. Data set accessed at  
646 [http://mirador.gsfc.nasa.gov/cgi-bin/mirador/](http://mirador.gsfc.nasa.gov/cgi-bin/mirador/presentNavigation.pl?tree=project&project=TRMM&dataGroup=Gridded&CGIS)  
647 [presentNavigation.pl?tree=project&project=TRMM&dataGroup=Gridded&CGIS](http://mirador.gsfc.nasa.gov/cgi-bin/mirador/presentNavigation.pl?tree=project&project=TRMM&dataGroup=Gridded&CGIS)  
648 [ESSID=5d12e2ffa38ca2aac6262202a79d882a](http://mirador.gsfc.nasa.gov/cgi-bin/mirador/presentNavigation.pl?tree=project&project=TRMM&dataGroup=Gridded&CGIS), 2012.

649 Harris, I., Jones, P.D., Osborn, T.J., and Lister, D.H.: Updated high-resolution grids of monthly  
650 climatic observations – the CRU TS3.10 Dataset, *Int. J. Climatol.*, 34 (3), 623-642, 2014.

651 Immerzeel, W.W., van Beek, L.P.H., and Bierkens, M.F.P.: Climate change will affect the Asian  
652 water towers, *Science*, 328, 1382-1385, 2010.

653 Jung, M., Reichstein, M., Ciais, P., Seneviratne, S.I., Sheffield, J., Goulden, M.L., Bonan, G.,  
654 Cescatti, A., Chen, J., de Jeu, R., Dolman, A.J., Eugster, W., Gerten, D., Gianelle, D., Gobron, N.,  
655 Heinke, J., Kimball, J., Law, B.E., Montagnani, L., Mu, Q., Mueller, B., Oleson, K., Papale, D.,  
656 Richardson, A.D., Rouspard, O., Running, S., Tomelleri, E., Viovy, N., Weber, U., Williams, C.,  
657 Wood, E., Zaehle, S., and Zhang, K.: Recent decline in the global land evapotranspiration trend  
658 due to limited moisture supply, *Nature*, 467, 951-954, 2010.

659 Kobayashi, S., Ota, Y., Harada, Y., Ebata, A., Moriya, M., Onoda, H., Onogi, K., kamahori, H.,  
660 kobayashi, C., Endo, H., miyaoka, K., and Takahashi, K.: The JRA-55 Reanalysis: General  
661 specifications and basic characteristics, *J.Meteor. Soc. Japan*, 93(1), 5-58, doi:  
662 [10.2151/jmsj.2015-001](https://doi.org/10.2151/jmsj.2015-001), 2015.

663 Landerer, F.W. and Swenson, S.C.: Accuracy of scaled GRACE terrestrial water storage estimates,  
664 *Water Resour.Res.*, 48, W04531, 2012.

665 Li, F.P., Zhang, Y.Q., Xu, Z.X., Liu, C.M., Zhou, Y.C., and Liu, W.F.: Runoff predictions in  
666 ungauged catchments in southeast Tibetan Plateau, *J. Hydrol.*, 511, 28-38, 2014.

667 Li, F.P., Zhang, Y.Q., Xu, Z.X., Teng, J., Liu, C.M., Liu, W.F., and Mpelasoka, F.: The impact of  
668 climate change on runoff in the southeastern Tibetan Plateau, *J. Hydrol.*, 505, 188-201, 2013.

669 Li, J.P. and Zeng, Q.C.: A unified monsoon index, *Geophys. Res. Lett.*, 29(8), 1274, 2002.

670 Li, X.P., Wang, L., Chen, D.L., Yang, K., and Wang, A.H.: Seasonal evapotranspiration changes  
671 (1983-2006) of four large basins on the Tibetan Plateau, *J. Geophys. Res.*, 119 (23),  
672 13079-13095, 2014.

673 Liang, S.L. and Xiao, Z.Q.: Global Land Surface Products: Leaf Area Index Product Data  
674 Collection(1985-2010), Beijing Normal University, doi:10.6050/glass863.3004.db, 2012.

675 Liu, J., Liu, T., Bao, A., De Maeyer, P., Feng, X., Miller, S.N., and Chen, X.: Assessment of  
676 different modeling studies on the spatial hydrological processes in an arid alpine catchment,  
677 *Water Resour. Manag.*, 30, 1757-1770, 2016.

678 Liu, T.: Hydrological characteristics of Yalungzangbo River, *Acta Geogr. Sin.*, 54 (Suppl.),  
679 157-164, 1999 (in Chinese).

680 Liu, W.B. and Sun, F.B.: Assessing estimates of evaporative demand in climate models using  
681 observed pan evaporation over China, *J. Geophys. Res. Atmos.*, 121, 8329-8349, 2016.

682 Liu, W.B., Wang, L., Zhou, J., Li, Y.Z., Sun, F.B., Fu, G.B., Li, X.P., and Sang, Y-F.: A worldwide  
683 evaluation of basin-scale evapotranspiration estimates against the water balance method, *J.*  
684 *Hydrol.*, 538, 82-95, 2016a.

685 Liu, W.B., Wang, L., Chen, D.L., Tu, K., Ruan, C.Q., and Hu, Z.Y.: Large-scale circulation  
686 classification and its links to observed precipitation in the eastern and central Tibetan Plateau,  
687 *Clim. Dyn.*, 46, 3481-3497, 2016b.

688 Liu, X.M., Yang, T., Hsu, K., Liu, C., and Sorooshian, S.: Evaluating the streamflow simulation  
689 capability of PERSIANN-CDR daily rainfall products in two river basins on the Tibetan Plateau,  
690 *Hydrol. Earth Syst. Sci. Discuss.*, doi: 10.5194/hess-20160282, 2016.

691 Long, D., Shen, Y.J., Sun, A., Hong, Y., Longuevergne, L., Yang, Y.T., Li, B., and Chen, L.:  
692 Drought and flood monitoring for a large karst plateau in Southwest China using extended  
693 GRACE data, *Remote Sens. Environ.*, 155, 145-160, 2014.

694 Lucchesi, R.: File specification for MERRA products, GMAO Office Note No.1 (version 2.3), 82  
695 pp, available from [http://gmao.gsfc.nasa.gov/pubs/office\\_notes](http://gmao.gsfc.nasa.gov/pubs/office_notes), 2012.

696 Ma, N., Szilagyi, J., Niu, G.Y., Zhang, Y.S., Zhang, T., Wang, B.B., and Wu, Y.H.: Evaporation  
697 variability of Nam Co Lake in the Tibetan Plateau and its role in recent rapid lake expansion, *J.*  
698 *Hydrol.*, 537, 27-35, 2016.

699 Ma, N., Zhang, Y.S., Guo, Y.H., Gao, H.F., Zhang, H.B., and Wang, Y.F.: Environmental and  
700 biophysical controls on the evapotranspiration over the highest alpine steppe, *J. Hydrol.*, 529,  
701 980-992, 2015.

702 Mamat, A., Halik, W., and Yang, X.: The climatic changes of Qarqan river basin and its impact on  
703 the runoff, *Xinjiang Agric. Sci.*, 47 (5), 996-1001, 2010 (in Chinese).

704 Mansur, S. and Ajinisa, T.: An analysis of water resources and it's hydrological characteristics of  
705 Yarkend River Valley, *J. Xinjiang Norm. Univ. (Nat. Sci. Ed.)*, 24(1), 74-78, 2005 (in Chinese).

706 McVicar, T.R., Roderick, M., Donohue, R.J., Li, L.T., Van Niel, T.G., Thomas, A., Grieser, J.,  
707 Jhajharia, D., Himri, Y., Mahowald, N.M., Mescherskaya, A.V., Kruger, A.C., Rehman, S., and  
708 Dinpashoh, Y.: Global review and synthesis of trends in observed terrestrial near-surface wind  
709 speeds: implications for evaporation, *J. Hydrol.*, 416-417, 182-205, 2012.

710 Miralles, D.G., De Jeu, R.A.M., Gash, J.H., Holmes, T.R.H., and Dolman, A.J.: Magnitude and  
711 variability of land evaporation and its components at the global scale, *Hydrol. Earth Syst. Sci.*, 15,  
712 967-981, 2011.

713 Miralles, D.G., Gash, J.H., Holmes, T.R.H., de Jeu, R.A.M, and Dolman, A.J.: Global canopy  
714 interception from satellite observations, *J. Geophys. Res.*, 115, D16122, 2010.

715 Neckel, N., Kropáček, J., Bolch, T., and Hochschild, V.: Glacier mass changes on the Tibetan  
716 Plateau 2003-2009 derived from ICESat laser altimetry measurements, *Environ. Res. Lett.*, 9,  
717 014009(7pp), 2014.

718 Oliveira, P.T.S., Mearing, M.A., Moran, M.S., Goodrich, D.C., Wendland, E., and Gupta, H.V.:  
719 Trends in water balance components across the Brazilian Cerrado, *Water Resour. Res.*, 50,  
720 7100-7114, 2014.

721 Rodell, M., Houser, P.R., Jambor, U., Gottschalck, J., Mitchell, K., Meng, C.-J., Arsenault, K.,  
722 Cosgrove, B., Radakovich, J., Bosilovich, M., Entin, J.K., Walker, P., Lohmann, D., and Toll, D.:  
723 The global land data assimilation system, *B. Am. Meteorol. Soc.*, 85, 381-394, 2004.

724 Rui, H.: README Document for Global Land Data Assimilation System Version 2 (GLDAS-2)  
725 Products, GES DISC, 2011.

726 Saji, N.H., Goswami, B.N., Vinayachandran, P.N., and Yamagata, T.: A dipole mode in the tropical  
727 Indian Ocean, *Nature*, 401, 360-363, 1999.

728 [Shen, M.G., Piao, S.L., Jeong, S., Zhou, L.M., Zeng, Z.Z., Ciais, P., Chen, D.L., Huang, M.T., Jin,  
729 C.S., Li, L.Z.X., Li, Y., Myneni, R.B., Yang, K., Zhang, G.X., Zhang, Y.J., and Yao, T.D.:  
730 Evaporative cooling over the Tibetan Plateau induced by vegetation growth, \*Proc. Natl. Acad.  
731 Sci. U. S.A.\*, 112\(30\), 9299-9304, 2015.](#)

732 Shi, Y.F., Shen, Y.P., Li, D.L., Zhang, G.W., Ding, Y.J., Hu, R.J., and Kang, E.S.: Discussion on  
733 the present climate change from Warm2dry to Warm2wet in northwest China, *Quat. Sci.*, 23(2),  
734 152-164, 2003 (in Chinese).

735 Shepard, D.S.: Computer mapping: the SYMAP interpolation algorithm. *Spatial Statistics and  
736 Models*, G.L. Gaile and C.J. Willmott, Eds., D. Reidel, 133-145, 1984.

737 Sun, B., Mao, W., Feng, Y., Chang, T., Zhang, L., and Zhao, L.: Study on the change of air  
738 temperature, precipitation and runoff volume in the Yarkant River basin, *Arid Zone Res.*, 23(2),  
739 203-209, 2006 (in Chinese).

740 Takala, M., Luojus, K., Pulliainen, J., Derksen, C., Lemmetyinen, J., Kärnä J.-P., Koskinen, J., and  
741 Bojkov, B.: Estimating northern hemisphere snow water equivalent for climate research through  
742 assimilation of spaceborne radiometer data and ground-based measurements, *Remote  
743 Sens. Environ.*, 115 (12), 3517-3529, 2011.

744 Tapley, B.D., Bettadpur, S., Watkins, M., and Reigber, C.: The gravity recovery and climate  
745 experiment: mission overview and early results, *Geophys. Res. Lett.*, 31, L09607, 2004.

746 Tian, L., Yao, T., MacClune, K., White, J.W.C., Schilla, A., Vaughn, B., Vachon, R., and  
747 Ichiyonagi, K.: Stable isotopic variations in west China: a consideration of moisture sources, *J.  
748 Geophys. Res. Atmos.*, 112, D10112, 2007.

749 Tucker, C.J., Pinzon, J.E., Brown, M.E., Slayback, D., Pak, E.W., Mahoney, R., Vermote, E., and  
750 El Saleous, N.: An extended AVHRR 8 km NDVI data set compatible with MODIS and SPOT  
751 vegetation NDVI data, *Int. J. Remote Sens.*, 26(20), 4485-4498, 2005.

752 [von Storch, H.: Misuses of statistical analysis in climate research, In Analysis of Climate](#)  
753 [Variability: Applications of Statistical Techniques, Springer-Verlag: Berlin, 11-26, 1995.](#)

754 Wang, A. and Zeng, X.: Evaluation of multireanalysis products within site observations over the  
755 Tibetan Plateau, *J. Geophys. Res.*, 117, D05102, 2012.

756 Wang, L., Sun, L.T., Shrestha, M., Li, X.P., Liu, W.B., Zhou, J., Yang, K., Lu, H., and Chen, D.L.:  
757 Improving snow process modeling with satellite-based estimation of  
758 near-surface-air-temperature lapse rate, *J. Geophys. Res. Atmos.*, 121, 12005-12030, 2016.

759 Xia, Y., Mitchell, K., Ek, M., Cosgrove, B., Sheffield, J., Luo, L., Alonge, C., Wei, H., Meng, J.,  
760 Livneh, B., and Duang, Q.: Continental-scale water and energy flux analysis and validation for  
761 North American Land Data Assimilation System project phase 2 (NLDAS-2): 2. Validation of  
762 model-simulated streamflow, *J. Geophys. Res. Atmos.*, 117(D3), D03110, 2012.

763 [Xiang, L., Wang, H., Steffen, H., Wu, P., Jia, L., Jiang, L., and Shen, Q.: Groundwater storage](#)  
764 [changes in the Tibetan Plateau and adjacent areas revealed from GRACE satellite gravity data,](#)  
765 [Earth Planet. Sci. Lett., 449, 228-239, 2016.](#)

766 Xu, L.: The land surface water and energy budgets over the Tibetan Plateau, Available from  
767 Nature Precedings < <http://hdl.handle.net/10101/npre.2011.5587.1>>, 2011.

768 Xue, B.L., Wang, L., Yang, K., Tian, L., Qin, J., Chen, Y., Zhao, L., Ma, Y., Koike, T., Hu, Z., and  
769 Li, X.P.: Modeling the land surface water and energy cycle of a mesoscale watershed in the  
770 central Tibetan Plateau with a distributed hydrological model, *J. Geophys. Res. Atmos.*, 118,  
771 8857-8868, 2013.

772 Yao, Z., Duan, R., and Liu, Z.: Changes in precipitation and air temperature and its impacts on  
773 runoff in the Nujiang River basins. *Resour. Sci.* 34(2), 202-210, 2012 (in Chinese)

774 Yang, K., Qin, J., Zhao, L., Chen, Y.Y., Tang, W.J., Han, M.L., Lazhu, Chen, Z.Q., Lv, N., Ding,  
775 B.H., Wu, H., and Lin, C.G.: A multi-scale soil moisture and freeze-thaw monitoring network  
776 on the third pole, *Bull. Am. Meteorol. Soc.*, 94, 1907-1916, 2013.

777 Yang, K., Wu, H., Qin, J., Lin, C.G., Tang, W.J., and Chen, Y.Y.: Recent climate changes over the  
778 Tibetan Plateau and their impacts on energy and water cycle: a review, *Glob. Planet Change*,  
779 112, 79-91, 2014.

780 Yao, T.D., Thompson, L., Yang, W., Yu, W.S., Gao, Y., Guo, X.J., Yang, X.X., Duan, K.Q., Zhao,  
781 H.B., Xu, B.Q., Pu, J.C., Lu, A.X., Xiang, Y., Kattel, D.B., and Joswiak, D.: Different glacier  
31 / 55

782 status with atmospheric circulations in Tibetan Plateau and surroundings, *Nat. Clim. Change*, 2,  
783 1-5, 2012.

784 [Yao, Y.J., Zhao, S.H., Zhang, Y.H., Jia, K., and Liu, M.: Spatial and decadal variations in potential](#)  
785 [evapotranspiration of China based on reanalysis datasets during 1982-2010, \*Atmosphere\*, 5,](#)  
786 [737-754, 2014.](#)

787 Yin, G., Hu, Z.Y., Chen, X., and Tiyyip, T.: Vegetation dynamics and its response to climate change  
788 in Central Asia, *J. Arid Land*, 8, 375, 2016.

789 Yu, J., Zhang, G., Yao, T., Xie, H., Zhang, H., Ke, C., and Yao, R.: Developing daily cloud-free  
790 snow composite products from MODIS Terra-Aqua and IMS for the Tibetan Plateau, *IEEE*  
791 *Trans. Geosci. Remote Sens.*, 54(4), 2171-2180, 2015.

792 [Yue, S., Pilon, P., Phinney, B., Cavadias, G.: The influence of autocorrelation on the ability to](#)  
793 [detect trend in hydrological series, \*Hydrol. Process.\*, 16\(9\), 1807-1829, 2002.](#)

794 Zhang, D., Liu, X., Zhang, Q., Liang, K., and Liu, C.: Investigation of factors affecting  
795 inter-annual variability of evapotranspiration and streamflow under different climate conditions.  
796 *J. Hydrol.*, doi:10.1016/j.jhydrol.2016.10.047, 2016.

797 Zhang, G., Xie, H., Yao, T., Liang, T., and Kang, S.: Snow cover dynamics of four lake basins  
798 over Tibetan Plateau using time series MODIS data (2001-2100), *Water Resour. Res.*, 48(10),  
799 W10529, 2012.

800 Zhang, K., Kimball, J.S., Nemani, R.R., and Running, S.W.: A continuous satellite-derived global  
801 record of land surface evapotranspiration from 1983 to 2006, *Water Resour. Res.*, 46(9),  
802 W09522, 2010.

803 Zhang, L., Su, F., Yang, D., Hao, Z., and Tong, K.: Discharge regime and simulation for the  
804 upstream of major rivers over Tibetan Plateau, *J. Geophys. Res. Atmos.*, 118(15), 8500-8518,  
805 2013.

806 [Zhang, Q., Li, J., Singh, V., and Xu, C.: Copula-based spatial-temporal patterns of precipitation](#)  
807 [extremes in China, \*Int. J. Climatol.\*, 33, 1140-1152, 2013.](#)

808 Zhang, X., Tang, Q., Pan, M., and Tang, Y.: A long-term land surface hydrologic fluxes and states  
809 dataset for China, *J. Hydrometeorol.*, 15, 2067-2084, 2014.

810 Zhang, Y., Peña-Arancibia, J.L., McVicar, T.R., Chiew, F.H.S., Vaze, J., Liu, C.M., Lu, X.J.,  
811 Zheng, H.X., Wang, Y.P., Liu, Y.Y., Miralles, D.G., and Pan, M.: Multi-decadal trends in global



812 terrestrial evapotranspiration and its components, *Scientific Reports*, 6, 19124, 2016.

813 Zhang, Y., Liu, C., Tang, Y., and Yang, Y.: Trend in pan evaporation and reference and actual  
814 evapotranspiration across the Tibetan Plateau, *J. Geophys. Res.*, 112, D12110, 2007.

815 Zhou, C., Jia, S., Yan, H., and Yang, G.: Changing trend of water resources in Qinghai Province  
816 from 1956 to 2000, *J. Glaciol. Geocryol.*, 27(3), 432-437, 2005 (in Chinese).

817 Zhou, J., Wang, L., Zhang, Y.S., Guo, Y.H., Li, X.P., and Liu, W.B.: Exploring the water storage  
818 changes in the largest lake (Selin Co) over the Tibetan Plateau during 2003-2012 from a  
819 basin-wide hydrological modeling, *Water Resour. Res.*, 51, 8060-8086, 2015.

820 Zhou, S.Q., Kang, S., Chen, F., and Joswiak, D.R.: Water balance observations reveal significant  
821 subsurface water seepage from Lake Nam Co., south-central Tibetan Plateau, *J. Hydrol.*, 491,  
822 89-99, 2013.

823 Zhou, S.Q., Wang, Z., and Joswiak, D.R.: From precipitation to runoff: stable isotopic fractionation  
824 effect of glacier melting on a catchment scale, *Hydrol. Process.*, 28(8), 3341-3349, 2014.

825 Zhu, Y., Chen, J., Chen, G.: Runoff variation and its impacting factors in the headwaters of the  
826 Yangtze River in recent 32 years, *J. Yangtze River Sci. Res. Inst.*, 28(6), 1-4, 2011 (in Chinese ).

827 **Table 1:** Main features of the 18 used TP river basins. GA% and SC% represent the percentages of multiyear-mean glacier cover and snow cover in each basin.  
828 The glacier and snow cover data are extracted, respectively, from the Second Glacier Inventory Dataset of China and the daily TP snow cover dataset  
829 (2005-2013)

| No. | Station       | Altitude<br>(m) | River name  | Drainage area<br>(km <sup>2</sup> ) | Multiyear-mean (1982-2011) and basin-averaged parameters |               |              |      |      |       |       |
|-----|---------------|-----------------|-------------|-------------------------------------|----------------------------------------------------------|---------------|--------------|------|------|-------|-------|
|     |               |                 |             |                                     | Q (mm/yr)                                                | Prec. (mm/yr) | Temp.(°C/yr) | NDVI | LAI  | GA%   | SC%   |
| 01  | Kulukelangan  | 2000            | Yerqiang    | 32880.00                            | 158.60                                                   | 128.34        | -5.68        | 0.05 | 0.03 | 10.97 | 35.03 |
| 02  | Tongguziluoke | 1650            | Yulongkashi | 14575.00                            | 151.56                                                   | 134.04        | -4.07        | 0.06 | 0.04 | 23.27 | 35.95 |
| 03  | Numaitilangan | 1880            | Keliya      | 7358.00                             | 103.18                                                   | 137.14        | -4.78        | 0.06 | 0.03 | 10.86 | 29.16 |
| 04  | Zelingou      | 4282            | Bayin       | 5544.00                             | 41.42                                                    | 340.68        | -4.98        | 0.13 | 0.09 | 0.09  | 21.22 |
| 05  | Gadatan       | 3823            | Yellow      | 7893.00                             | 200.95                                                   | 566.01        | -4.60        | 0.34 | 0.54 | 0.13  | 14.94 |
| 06  | Xining        | 3225            | Yellow      | 9022.00                             | 99.90                                                    | 503.74        | 0.97         | 0.36 | 0.70 | 0.00  | 10.06 |
| 07  | Tongren       | 3697            | Yellow      | 2832.00                             | 149.36                                                   | 533.25        | -1.37        | 0.39 | 0.83 | 0.00  | 9.42  |
| 08  | Tainaihai     | 2632            | Yellow      | 121972.00                           | 159.48                                                   | 540.32        | -2.40        | 0.34 | 0.72 | 0.09  | 15.89 |
| 09  | Huangheyang   | 4491            | Yellow      | 20930.00                            | 31.18                                                    | 386.42        | -4.81        | 0.23 | 0.61 | 0.00  | 17.25 |
| 10  | Jimai         | 4450            | Yellow      | 45015.00                            | 85.50                                                    | 441.48        | -4.16        | 0.26 | 0.52 | 0.00  | 20.05 |
| 11  | Yajiang       | 2599            | Yalong      | 67514.00                            | 237.66                                                   | 717.05        | -0.23        | 0.43 | 0.80 | 0.15  | 18.36 |
| 12  | Zhimenda      | 3540            | Yangtze     | 137704.00                           | 96.23                                                    | 405.66        | -4.83        | 0.20 | 0.26 | 0.96  | 17.87 |
| 13  | Jiaoyuqiao    | 3000            | Salween     | 72844.00                            | 364.26                                                   | 620.88        | -1.89        | 0.29 | 0.44 | 2.02  | 23.73 |
| 14  | Pangduo       | 5015            | Brahmaputra | 16459.00                            | 348.31                                                   | 544.59        | -1.53        | 0.27 | 0.33 | 1.66  | 23.33 |
| 15  | Tangjia       | 4982            | Brahmaputra | 20143.00                            | 350.61                                                   | 555.17        | -1.89        | 0.27 | 0.34 | 1.39  | 21.83 |
| 16  | Gongbujiangda | 4927            | Brahmaputra | 6417.00                             | 586.96                                                   | 692.06        | -4.24        | 0.27 | 0.36 | 4.12  | 25.99 |
| 17  | Nuxia         | 2910            | Brahmaputra | 191235.00                           | 307.38                                                   | 401.35        | -0.73        | 0.22 | 0.25 | 1.90  | 13.50 |
| 18  | Yangcun       | 3600            | Brahmaputra | 152701.00                           | 163.25                                                   | 349.91        | -0.87        | 0.19 | 0.18 | 1.28  | 10.52 |

831  
832

833 **Table 2:** Overview of multi-source datasets applied in this study

834

| Data category                   | Data source                                   | Spatial resolution | Temporal resolution | Available period used | Reference              |
|---------------------------------|-----------------------------------------------|--------------------|---------------------|-----------------------|------------------------|
| Runoff (Q)                      | Observed, National Hydrology Almanac of China | —                  | Daily               | 1982-2011             | —                      |
|                                 | VIC_IGSNRR simulated                          | 0.25°              | Daily               | 1982-2011             | Zhang et al. (2014)    |
| Precipitation (P)               | Observed, CMA                                 | 0.5°               | Monthly             | 1982-2011             | —                      |
|                                 | TRMM 3B43 V7                                  | 0.25°              | Monthly             | 2000-2011             | Huffman et al. (2012)  |
|                                 | IGSNRR forcing                                | 0.25°              | Daily               | 1982-2011             | Zhang et al. (2014)    |
| Temperature (Temp.)             | Observed, CMA                                 | 0.5°               | Monthly             | 2000-2011             | —                      |
| Terrestrial storage change (ΔS) | GRACE-CSR                                     | Approx.300-400 km  | Monthly             | 2002-2011             | Tapley et al. (2004)   |
|                                 | GRACE-GFZ                                     | Approx.300-400 km  | Monthly             | 2002-2011             | Tapley et al. (2004)   |
|                                 | GRACE-JPL                                     | Approx.300-400 km  | Monthly             | 2002-2011             | Tapley et al. (2004)   |
| Potential evaporation (PET)     | CRU                                           | 0.5°               | Monthly             | 1982-2011             | Harris et al. (2013)   |
| Actual evaporation (ET)         | MTE_E                                         | 0.5°               | Monthly             | 1982-2011             | Jung et al. (2010)     |
|                                 | VIC_E                                         | 0.25°              | Daily               | 1982-2011             | Zhang et al. (2014)    |
|                                 | GLEAM_E                                       | 0.25°              | Daily               | 1982-2011             | Miralles et al. (2011) |
|                                 | PML_E                                         | 0.5°               | Monthly             | 1982-2011             | Zhang Y et al. (2016)  |
|                                 | Zhang_E                                       | 8 km               | Monthly             | 1983-2006             | Zhang et al. (2010)    |
|                                 | GNoah_E                                       | 1.0°               | 3 hourly            | 1982-2011             | Rui (2011)             |
| NDVI                            | GIMMS NDVI dataset                            | 8 km               | 15 daily            | 1982-2011             | Tucker et al. (2005)   |
| LAI                             | GLASS LAI Product                             | 0.05°              | 8 daily             | 1982-2011             | Liang and Xiao (2012)  |
| Snow Cover                      | TP Snow composite Products                    | 500 m              | Daily               | 2005-2013             | Zhang et al. (2012)    |
| SWE                             | VIC_IGSNRR simulated                          | 0.25°              | Daily               | 1982-2011             | Zhang et al. (2014)    |
|                                 | GlobSnow-2 Product                            | 25 km              | Daily               | 1982-2011             | Takala et al. (2011)   |

835

836 **Table 3:** Contribution of glacier-melt to discharge in eighteen basins (“—” shows no glacier influences, “—\*” shows the percentage is empirically estimated  
837 | through the relation between lacier area ratio and glacier melt for basins in which the glacier melt contribution has been reported in [existing studies the literatures](#))  
838

| Basin         | Contributions of glacier-melt to discharge (%) | Reference                |
|---------------|------------------------------------------------|--------------------------|
| Kulukelangan  | 62.73                                          | Mansur and Ajnisa (2005) |
| Tongguziluoke | 64.90                                          | Liu J et al. (2016)      |
| Numaitilangan | 71                                             | Chen (1988)              |
| Zelingou      | —                                              | —                        |
| Gadatan       | —                                              | —                        |
| Xining        | —                                              | —                        |
| Tongren       | —                                              | —                        |
| Tainaihai     | 0.80                                           | Zhang et al. (2013)      |
| Huangheyang   | —                                              | —                        |
| Jimai         | —                                              | —                        |
| Yajiang       | 1.40                                           | —*                       |
| Zhimenda      | 6.50                                           | Zhang et al. (2013)      |
| Jiaoyuqiao    | 4.80                                           | Zhang et al. (2013)      |
| Nuxia         | 11.60                                          | Zhang et al. (2013)      |
| Pangduo       | 10.13                                          | —*                       |
| Tangjia       | 8.49                                           | —*                       |
| Gongbujiangda | 25.15                                          | —*                       |
| Yangcun       | 7.81                                           | —*                       |

839  
840  
841

842 **Table 4:** Nonparametric trends for different ET estimates during the period 1982-2006 detected by modified Mann-Kendall test, the bold number showed the  
 843 detected trend is statistically significant at the 0.05 level

| 844 | Basin         | ET <sub>wb</sub> | GLEAM_E     | VIC_E       | Zhang_E      | PML_E       | MET_E        | GNoah_E     |
|-----|---------------|------------------|-------------|-------------|--------------|-------------|--------------|-------------|
| 846 | Kulukelangan  | <b>-0.09</b>     | 0.09        | <b>0.18</b> | _            | 0.03        | -0.01        | 0.07        |
|     | Tongguziluoke | -0.02            | 0.10        | <b>0.13</b> | _            | 0.03        | <b>-0.08</b> | 0.19        |
| 847 | Numaitilangan | 0.04             | <b>0.10</b> | 0.14        | _            | 0.14        | <b>-0.10</b> | 0.22        |
|     | Zelingou      | <b>0.13</b>      | <b>0.23</b> | 0.11        | <b>0.09</b>  | 0.04        | <b>0.06</b>  | 0.02        |
| 848 | Gadatan       | -0.09            | 0.25        | 0.070       | -0.10        | -0.01       | <b>0.06</b>  | -0.07       |
|     | Xining        | -0.06            | <b>0.54</b> | 0.01        | -0.08        | 0.01        | 0.02         | -0.06       |
| 849 | Tongren       | -0.06            | <b>0.34</b> | -0.15       | <b>-0.17</b> | 0.07        | 0.02         | 0.13        |
|     | Tainaihai     | 0.06             | <b>0.28</b> | -0.03       | <b>-0.11</b> | 0.04        | <b>0.05</b>  | 0.04        |
| 850 | Huangheyang   | 0.08             | <b>0.19</b> | -0.01       | <b>-0.10</b> | <b>0.08</b> | <b>0.05</b>  | <b>0.10</b> |
|     | Jimai         | -0.07            | <b>0.23</b> | -0.01       | -0.08        | 0.03        | <b>0.05</b>  | 0.10        |
| 851 | Yajiang       | 0.17             | <b>0.26</b> | <b>0.06</b> | <b>-0.21</b> | -0.01       | 0.03         | -0.02       |
|     | Zhimenda      | 0.11             | <b>0.28</b> | 0.10        | 0.01         | 0.07        | <b>0.04</b>  | 0.07        |
| 852 | Jiaoyuqiao    | <b>0.18</b>      | <b>0.28</b> | 0.10        | <b>-0.11</b> | 0.05        | <b>0.05</b>  | 0.07        |
|     | Nuxia         | <b>-0.09</b>     | <b>0.25</b> | 0.09        | <b>-0.10</b> | <b>0.12</b> | <b>0.04</b>  | 0.10        |
| 853 | Pangduo       | 0.05             | <b>0.28</b> | <b>0.17</b> | <b>-0.07</b> | 0.07        | <b>0.07</b>  | <b>0.11</b> |
|     | Tangjia       | 0.09             | <b>0.26</b> | <b>0.17</b> | <b>-0.09</b> | <b>0.20</b> | <b>0.06</b>  | <b>0.12</b> |
| 854 | Gongbujiangda | -0.26            | 0.12        | 0.13        | <b>-0.16</b> | <b>0.19</b> | 0.01         | <b>0.15</b> |
|     | Yangcun       | 0.03             | <b>0.28</b> | 0.08        | <b>-0.06</b> | 0.10        | 0.04         | 0.09        |

855

856

857 **Figure captions:**

858 **Figure 1.** Map of river basins and hydrological gauging stations (green dots) over the  
859 Tibetan Plateau (TP) used in this study. The grey shading shows the topography of TP  
860 in meters above the sea level and the blue shading exhibits the glaciers distribution in  
861 TP extracted from the Second Glacier Inventory Dataset of China.

862 **Figure 2.** Comparison of VIC\_IGSNRR simulated and observed monthly runoff for  
863 Tangnaihai and Panduo stations (a and b) as well as (c) basin-averaged monthly  
864 TRMM, CMA gridded and IGSNRR forcing precipitations for the smallest basin  
865 (Tongren station) over the period 1982-2011. (d) shows the comparison of TRMM  
866 (blue) and IGSNRR forcing (red) precipitations against CMA gridded precipitation for  
867 18 river basins over TP during the period 2000-2011.

868 **Figure 3.** Comparison of different ET products against the calculated ET through the  
869 water balance method ( $ET_{wb}$ ) for 18 TP basins. The boxplot of annual estimates of  
870 different ET products for 18 TP basins are shown in (a) while the correlation  
871 coefficients and root-mean-square-errors (RMSEs, mm/month) for each ET product  
872 relatively to  $ET_{wb}$  are exhibited in (b).

873 **Figure 4.** General water and energy status (a. the perspective of Budyko framework)  
874 and their relationships with glacier (b) and vegetation (c and d) for eighteen TP river  
875 basins (1983-2006). The ET used in this figure is calculated from the bias-corrected  
876 water balance method.

877 **Figure 5.** Seasonal cycles (1982-2011) of water budget components in westerlies-  
878 dominated (column 1), East Asian monsoon-dominated (columns 2-4) and Indian  
879 monsoon-dominated (columns 5-6) TP basins.

880 **Figure 6.** Seasonal cycles (1982-2011) of air temperature and vegetation parameters  
881 in westerlies-dominated (column 1), East Asian monsoon-dominated (columns 2-4)  
882 and Indian monsoon-dominated (columns 5-6) TP basins.

883 **Figure 7.** Seasonal cycles (1982-2011) of snow cover and snow water equivalent  
884 (SWE) in westerlies-dominated (column 1), East Asian monsoon-dominated (columns  
885 2-4) and Indian monsoon-dominated (columns 5-6) TP basins. The snow cover was

886 extracted from cloud free snow composite product during the period 2005-2013. It

887 should also be noted that the GlobSnow data are not available for some basins.

888 **Figure 8.** Sen's slopes of water budget components and vegetation parameters in  
889 westerlies-dominated TP basins during the period of 1982-2011. The double red stars  
890 showed that the trend was statistically significant at the 0.05 level.

891 **Figure 9.** Linear [and non-parametric](#) trends of westerly, Indian monsoon and East  
892 Asian summer monsoon during the period 1982-2011 revealed prospectively by the  
893 Asian Zonal Circulation Index, Indian Ocean Dipole Mode Index and East Asian  
894 Summer Monsoon Index.

895 **Figure 10.** Similar to Figure 8 but for East Asian monsoon-dominated TP basins. It  
896 should be noted that the GlobSnow data are not available for some basins. The double  
897 red stars showed that the trend was statistically significant at the 0.05 level.

898 **Figure 11.** Similar to Figure 8 but for Indian monsoon-dominated TP basins. It should  
899 be noted that the GlobSnow data are not available for some basins. The double red  
900 stars showed that the trend was statistically significant at the 0.05 level.

901 **Figure 1.** Map of river basins and hydrological gauging stations (green dots) over the Tibetan Plateau (TP) used in this study. The grey shading shows the  
902 topography of TP in meters above the sea level and the blue shading exhibits the glaciers distribution in TP extracted from the Second Glacier Inventory Dataset of  
903 China.

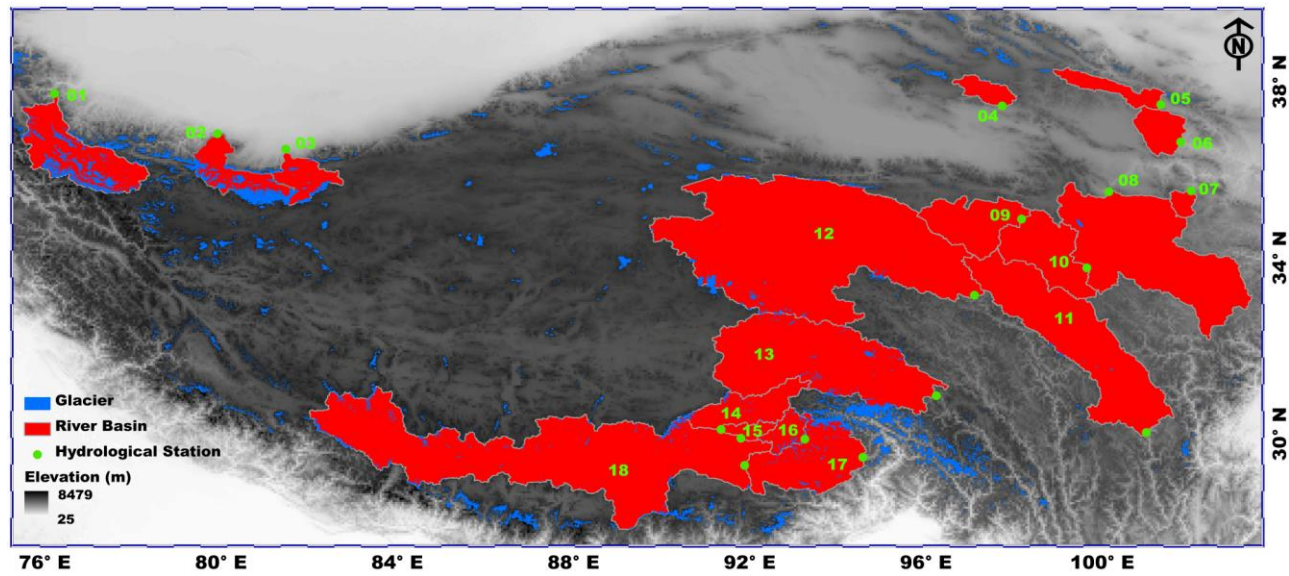

904  
905



906 **Figure 2.** Comparison of VIC\_IGSNRR simulated and observed monthly runoff for Tangnaihai and Panduo stations (a and b) as well as (c) basin-averaged  
 907 monthly TRMM, CMA gridded and IGSNRR forcing precipitations for the smallest basin (Tongren station) over the period 1982-2011. (d) shows the comparison of  
 908 TRMM (blue) and IGSNRR forcing (red) precipitations against CMA gridded precipitation for 18 river basins over TP during the period 2000-2011.

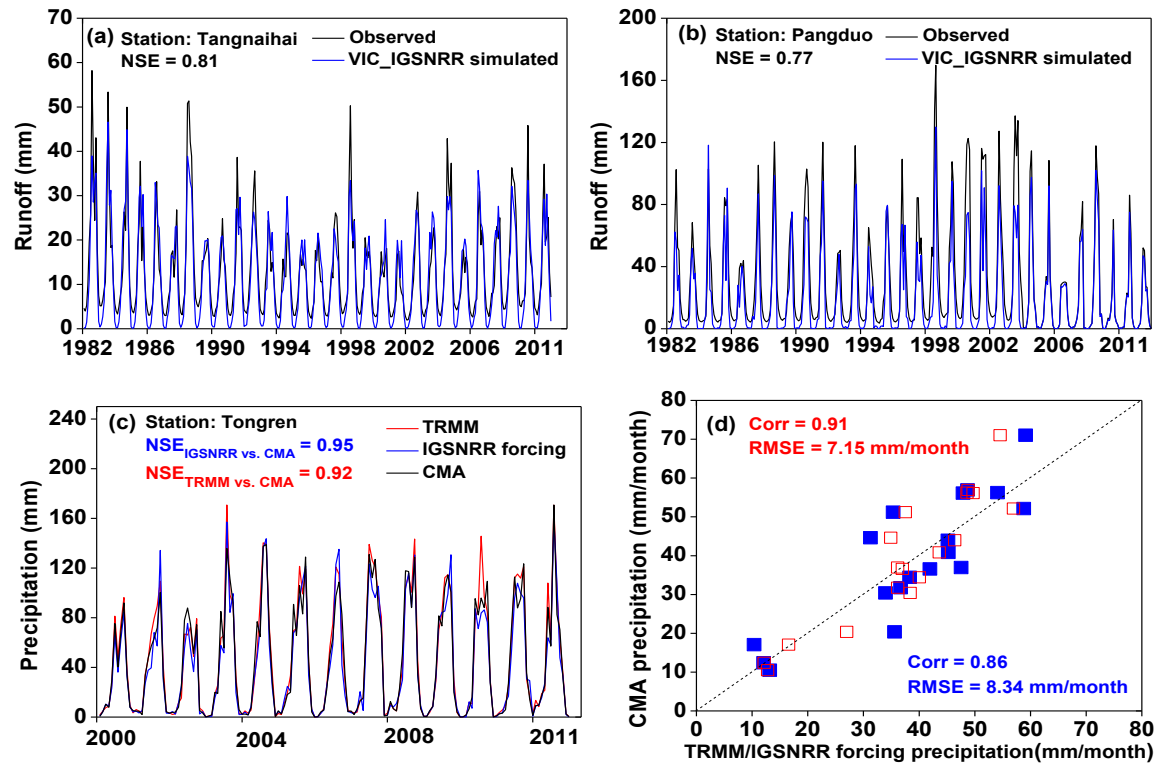

909

910

911

912 **Figure 3.** Comparison of different ET products against the calculated ET through the water balance ( $ET_{wb}$ ) for 18 river basins over the Tibetan Plateau. The  
 913 boxplot of annual estimates of different ET products for 18 TP basins are shown in (a) while the correlation coefficients and root-mean-square-errors (RMSEs,  
 914 mm/month) for each ET product relatively to  $ET_{wb}$  are exhibited in (b).

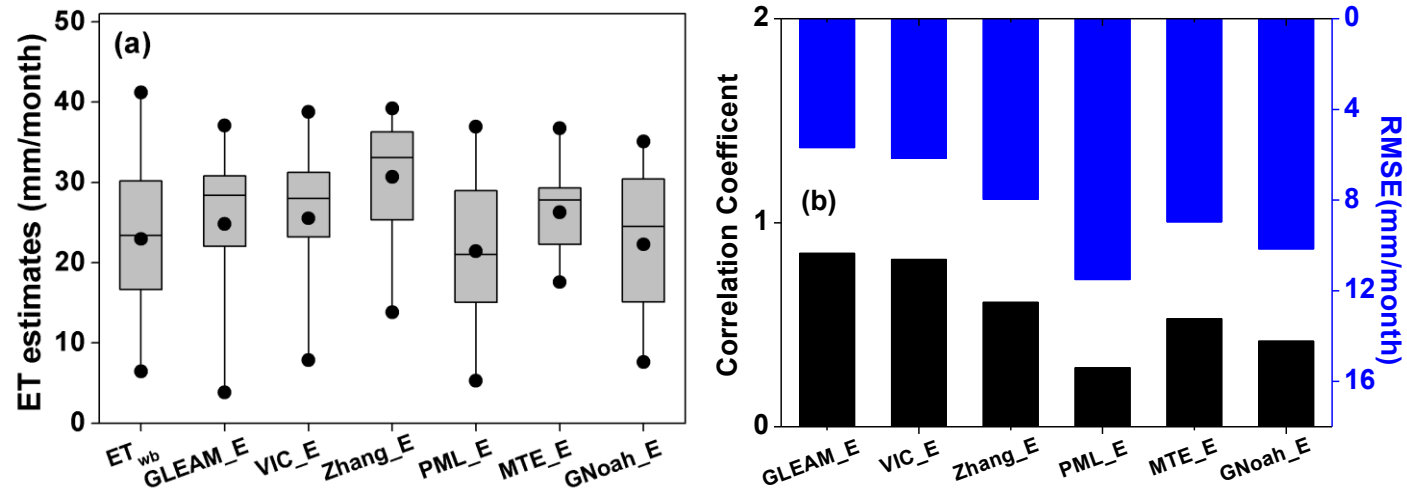

915  
916

917 **Figure 4.** General water and energy status (a. the perspective of Budyko framework) and their relationships with glacier (b) and vegetation (c and d) for eighteen  
 918 TP river basins (1983-2006). The ET used in this figure is calculated from the bias-corrected water balance method.

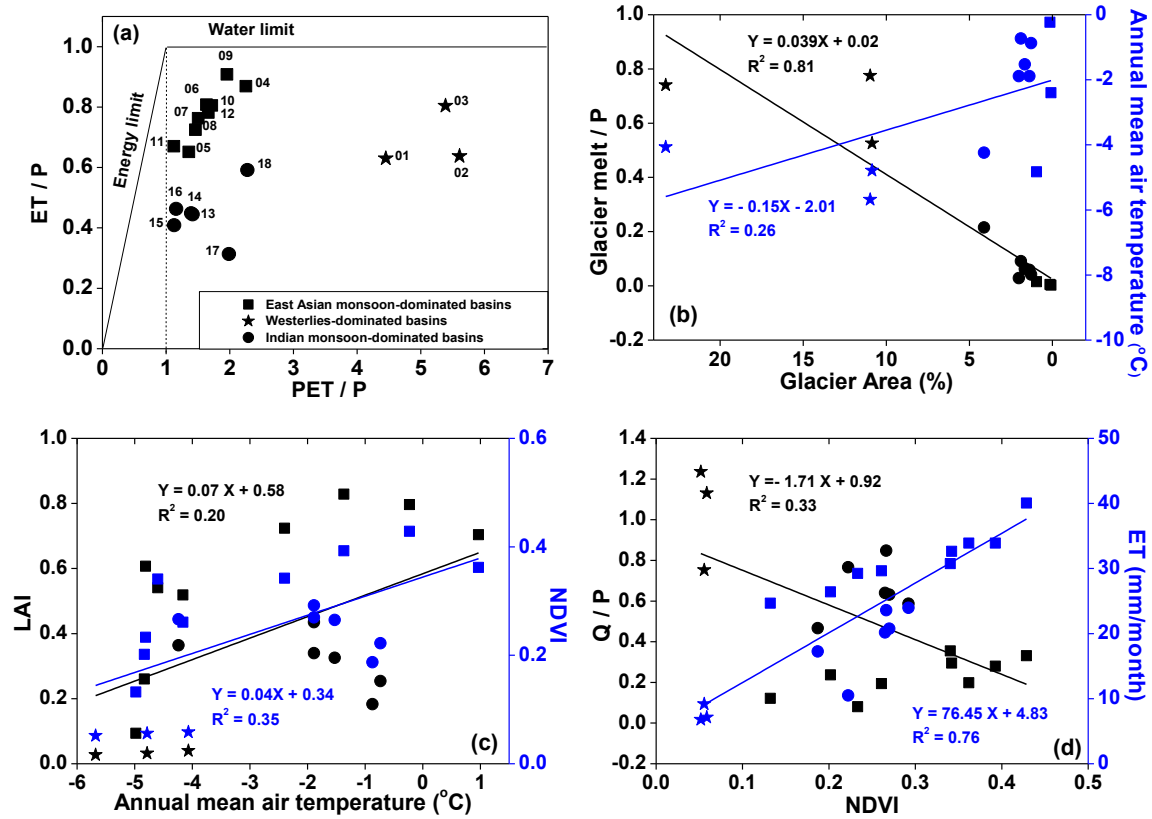

919

920

921 **Figure 5.** Seasonal cycles (1982–2011) of water budget components in westerlies-dominated (column 1), East Asian monsoon-dominated (columns 2–4) and Indian  
 922 monsoon-dominated (columns 5–6) TP basins.

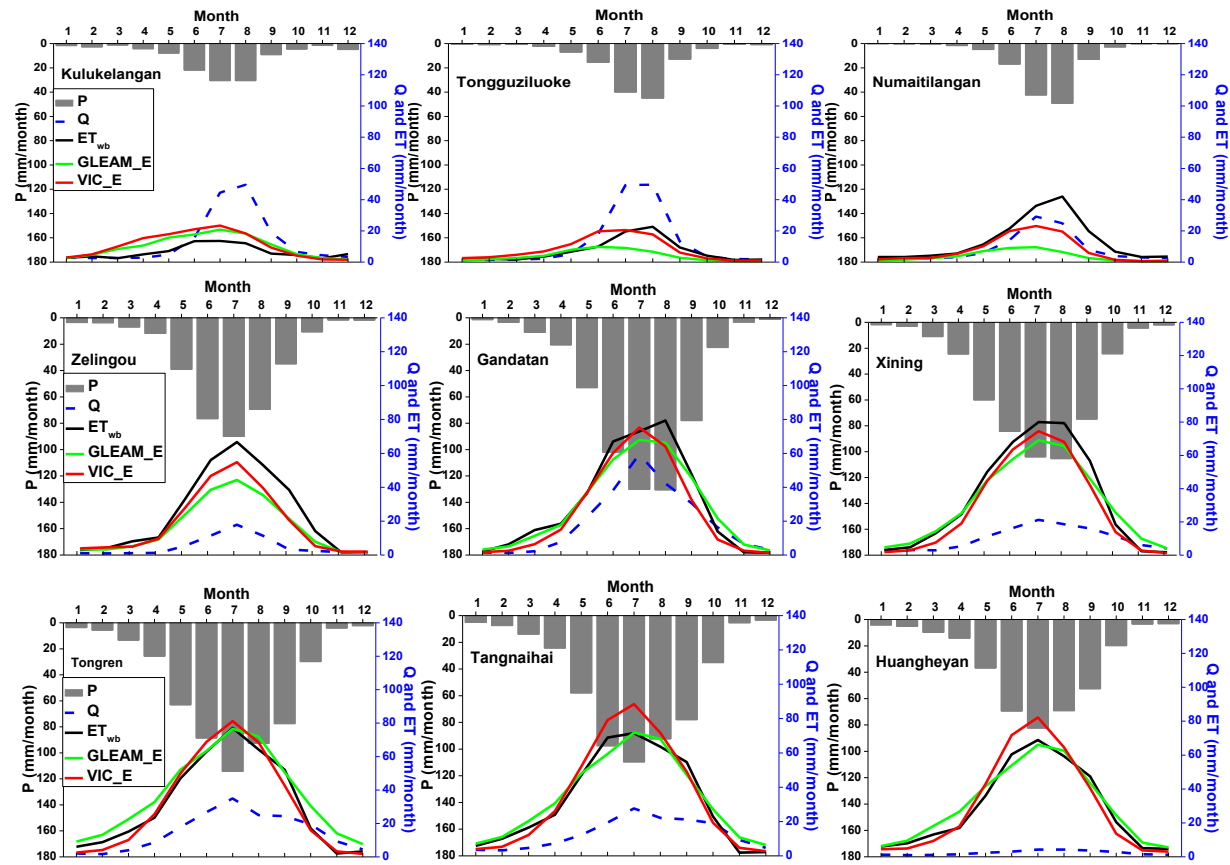

923

924

925

926

Figure 5: (continued)

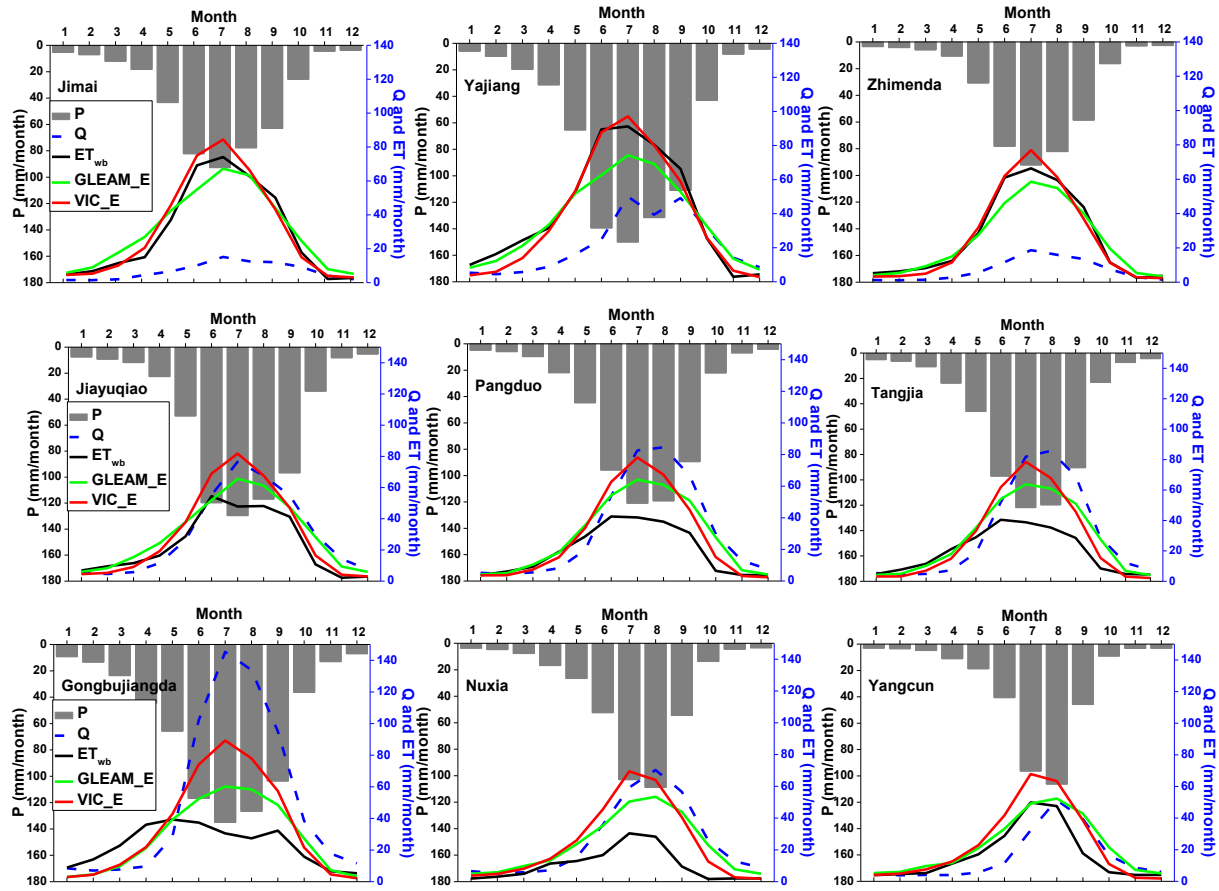

927

928

929

930 **Figure 6.** Seasonal cycles (1982-2011) of air temperature and vegetation parameters in westerlies-dominated (column 1), East Asian monsoon-dominated (columns  
 931 2-4) and Indian monsoon-dominated (columns 5-6) TP basins.

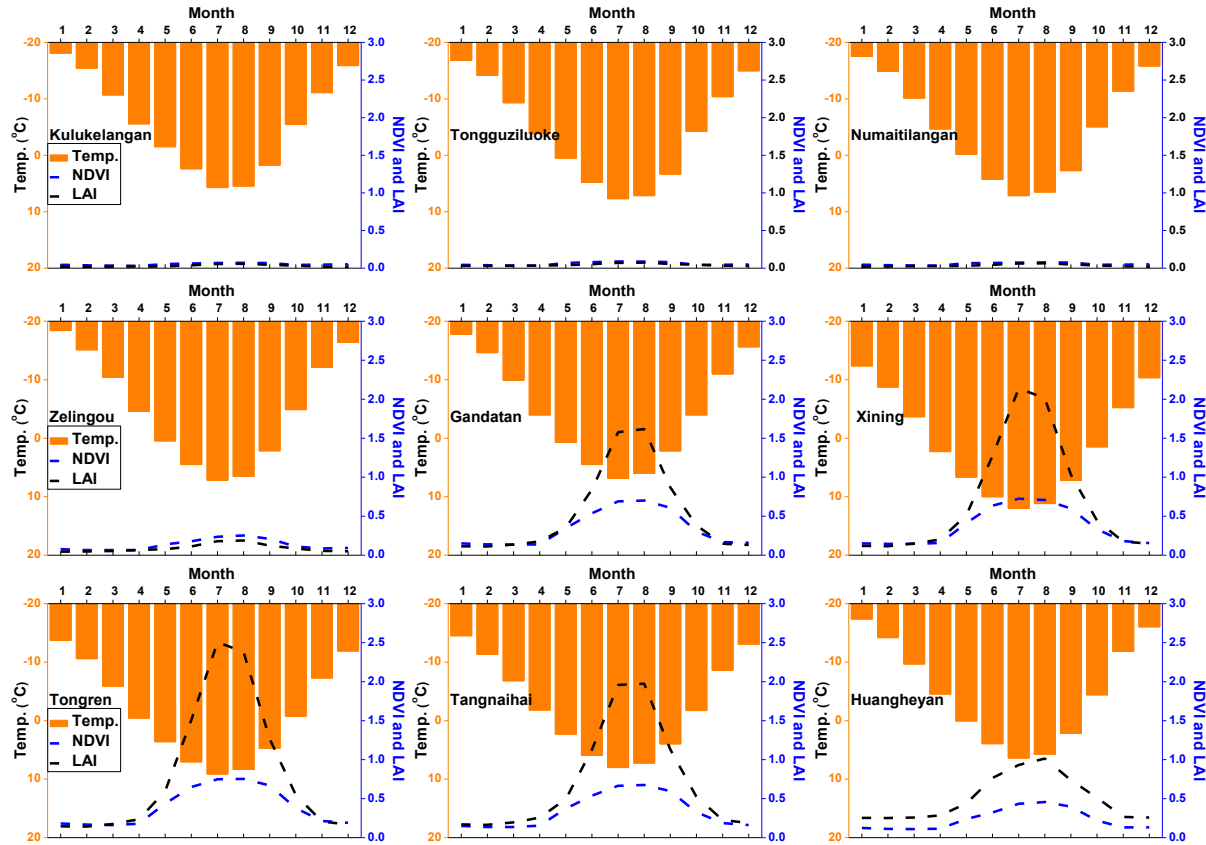

932

933

934

935

936

937

938

939

Figure 6: (continued)

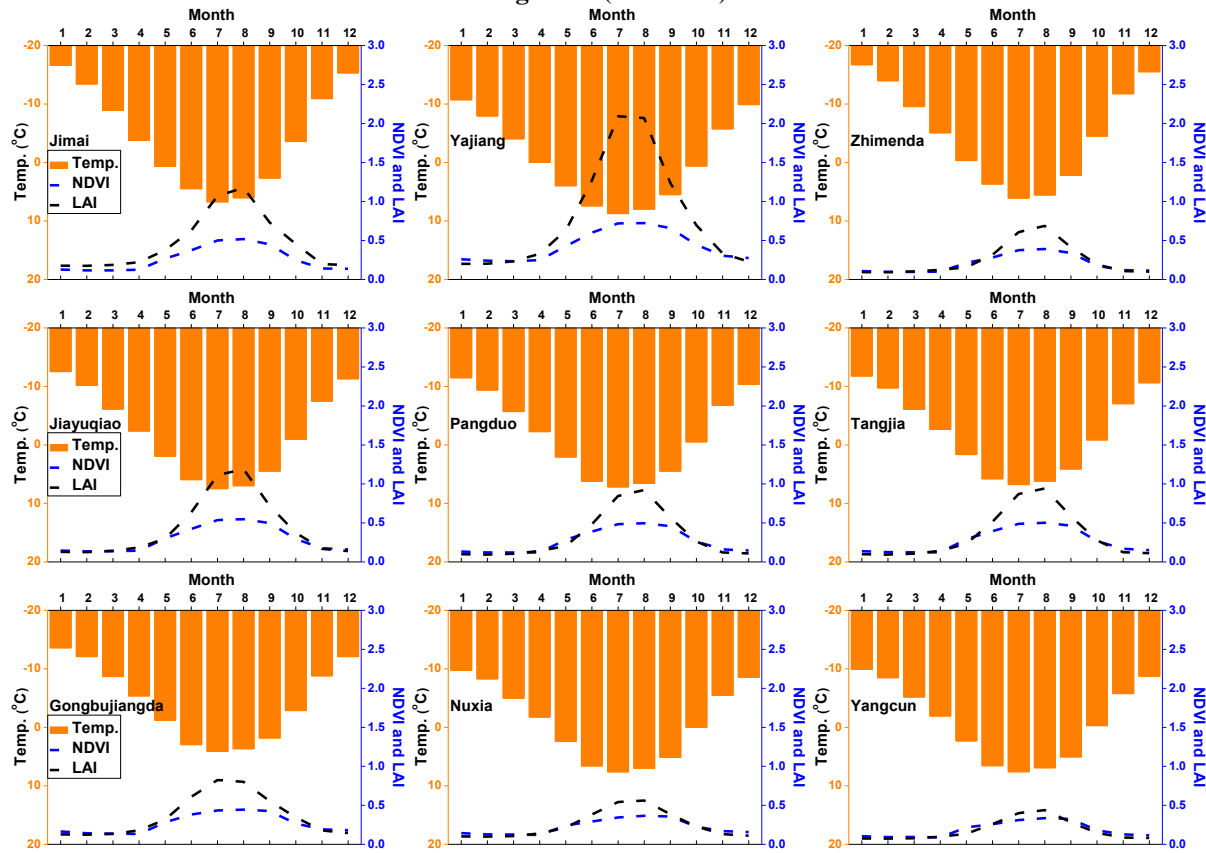

940 **Figure 7.** Seasonal cycles (1982-2011) of snow cover and snow water equivalent (SWE) in westerlies-dominated (column 1), East Asian monsoon- dominated  
941 (columns 2-4) and Indian monsoon-dominated (columns 5-6) TP basins. The snow cover was extracted from cloud free snow composite product during the period  
942 2005-2013. It should also be noted that the GlobSnow data are not available for some basins.  
943

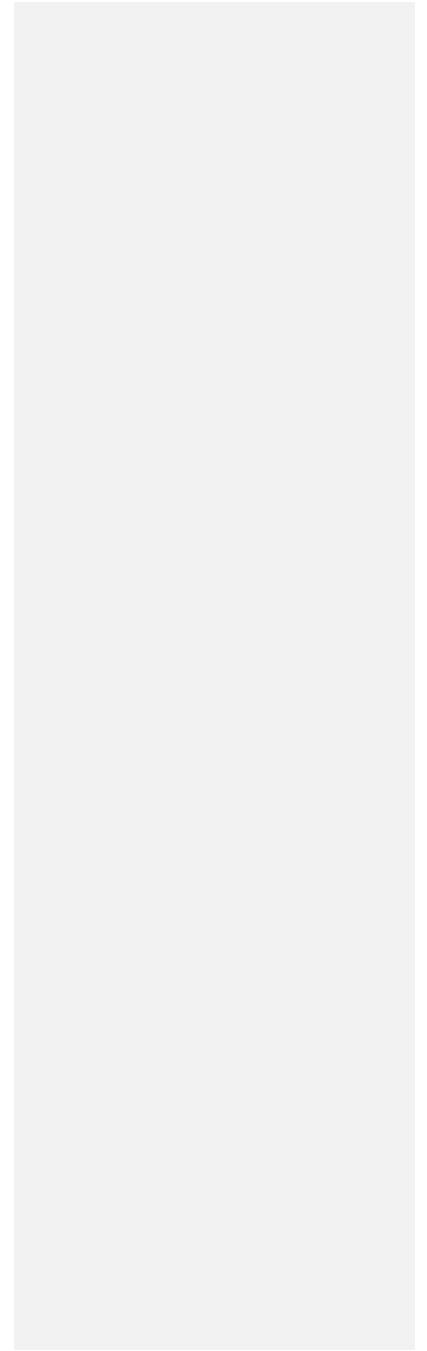



944

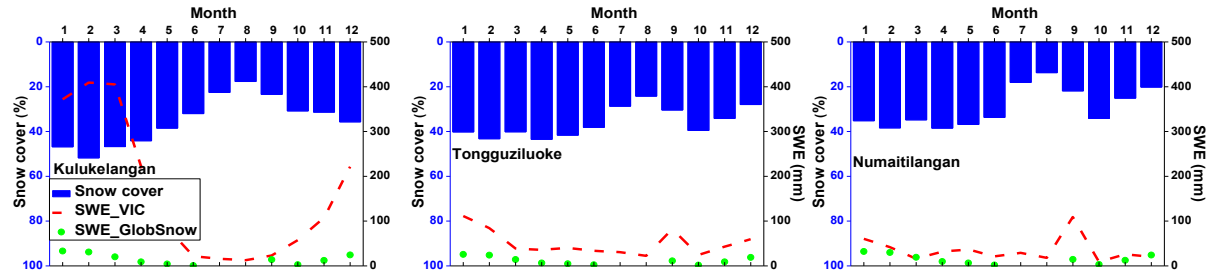

945

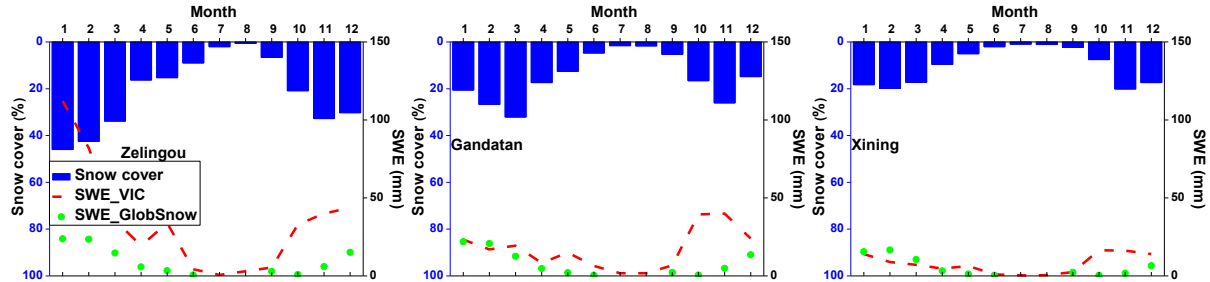

946

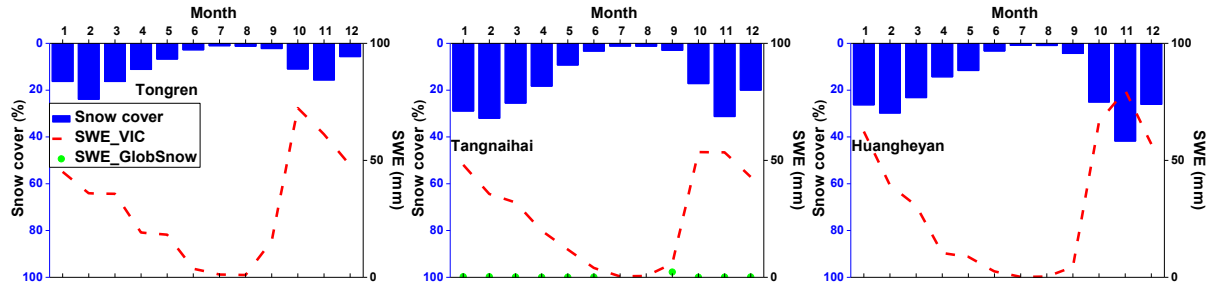

947

948

949

Figure 7: (continued)

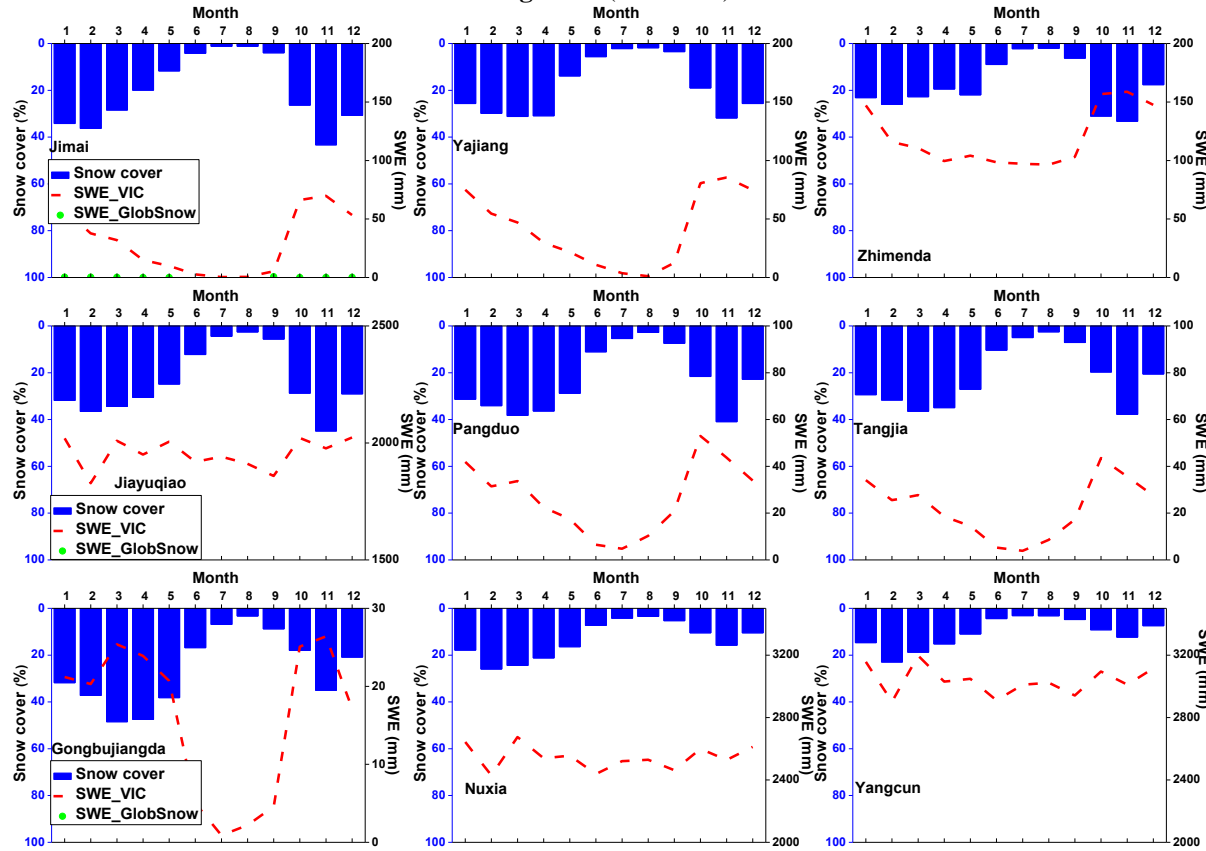

950

951

952

953

954 **Figure 8.** Sen's slopes of water budget components and vegetation parameters in westerlies-dominated TP basins during the period of 1982-2011. The double red  
 955 stars showed that the trend was statistically significant at the 0.05 level.

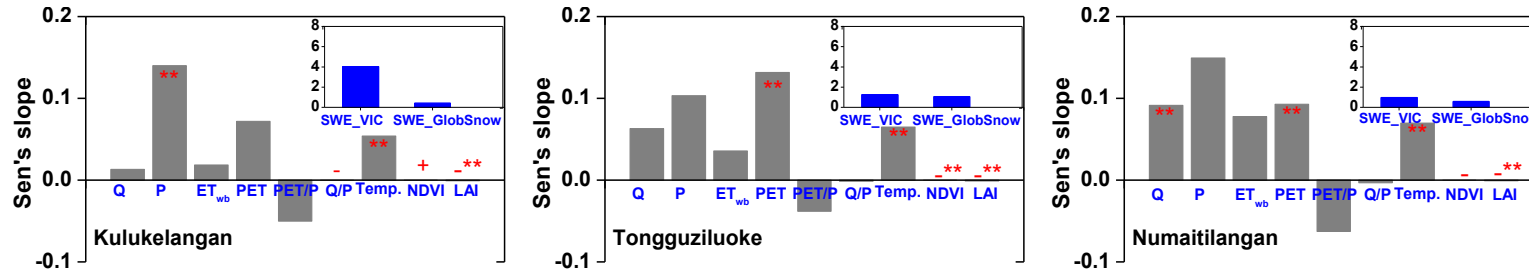

956  
957

958 | **Figure 9.** Linear and non-parametric trends of westerly, Indian monsoon and East Asian summer  
 959 monsoon during the period 1982-2011 revealed prospectively by the Asian Zonal Circulation  
 960 Index, Indian Ocean Dipole Mode Index and East Asian Summer Monsoon Index.

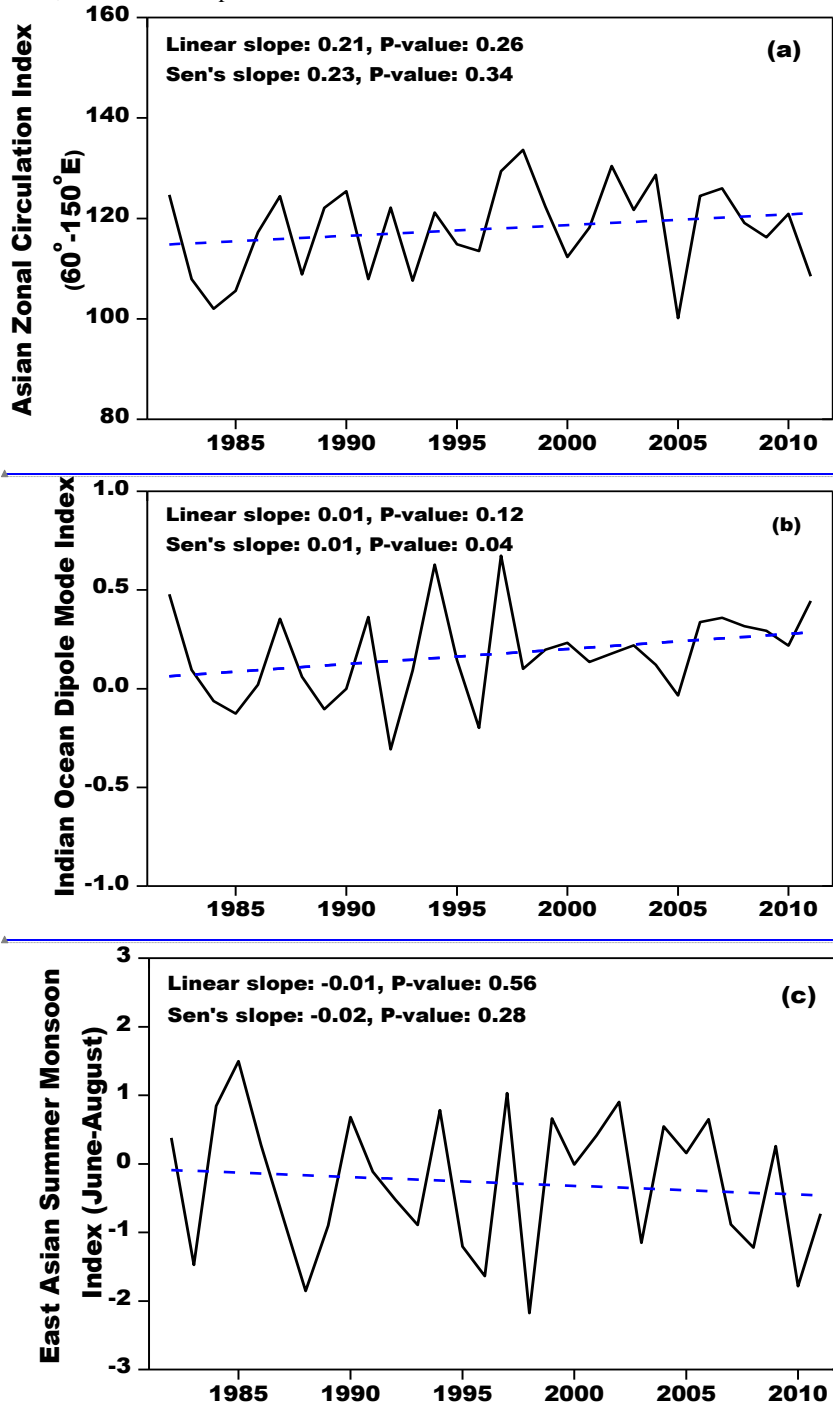

域代码已更改

域代码已更改

带格式的: 左  
 域代码已更改

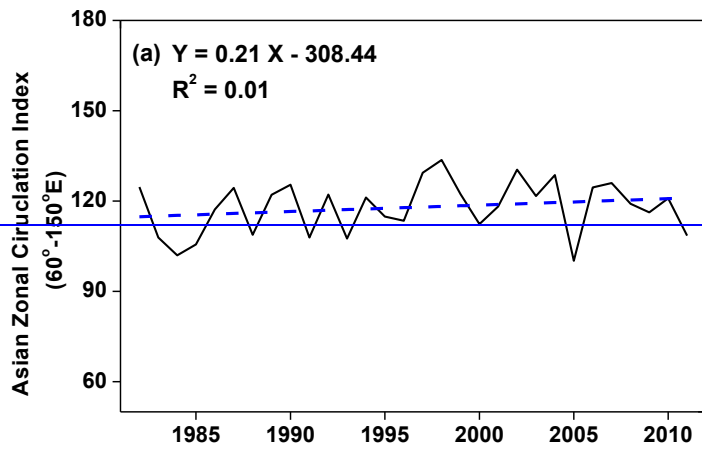

964

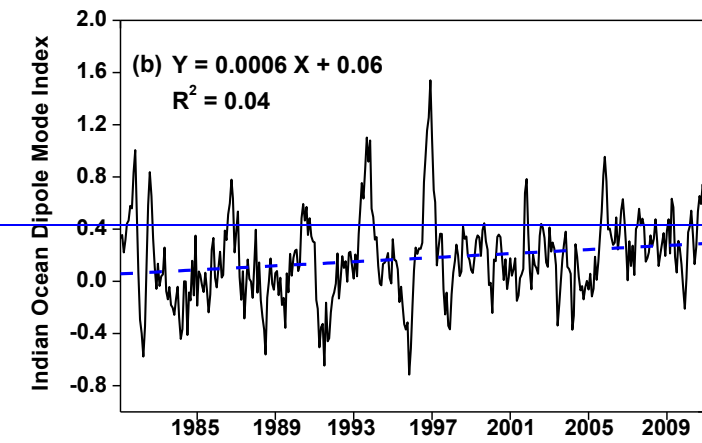

965

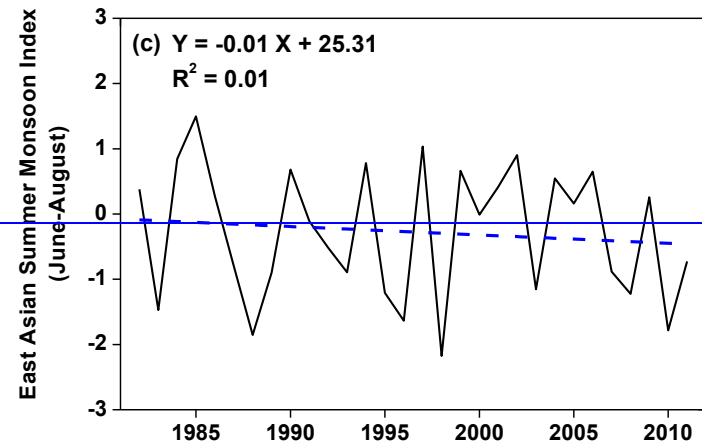

966

967

968

带格式的：两端对齐

969 **Figure 10.** Similar to Figure 8 but for East Asian monsoon-dominated TP basins. It should be noted that the GlobSnow data are not available for some basins. The  
 970 double red stars showed that the trend was statistically significant at the 0.05 level.  
 971

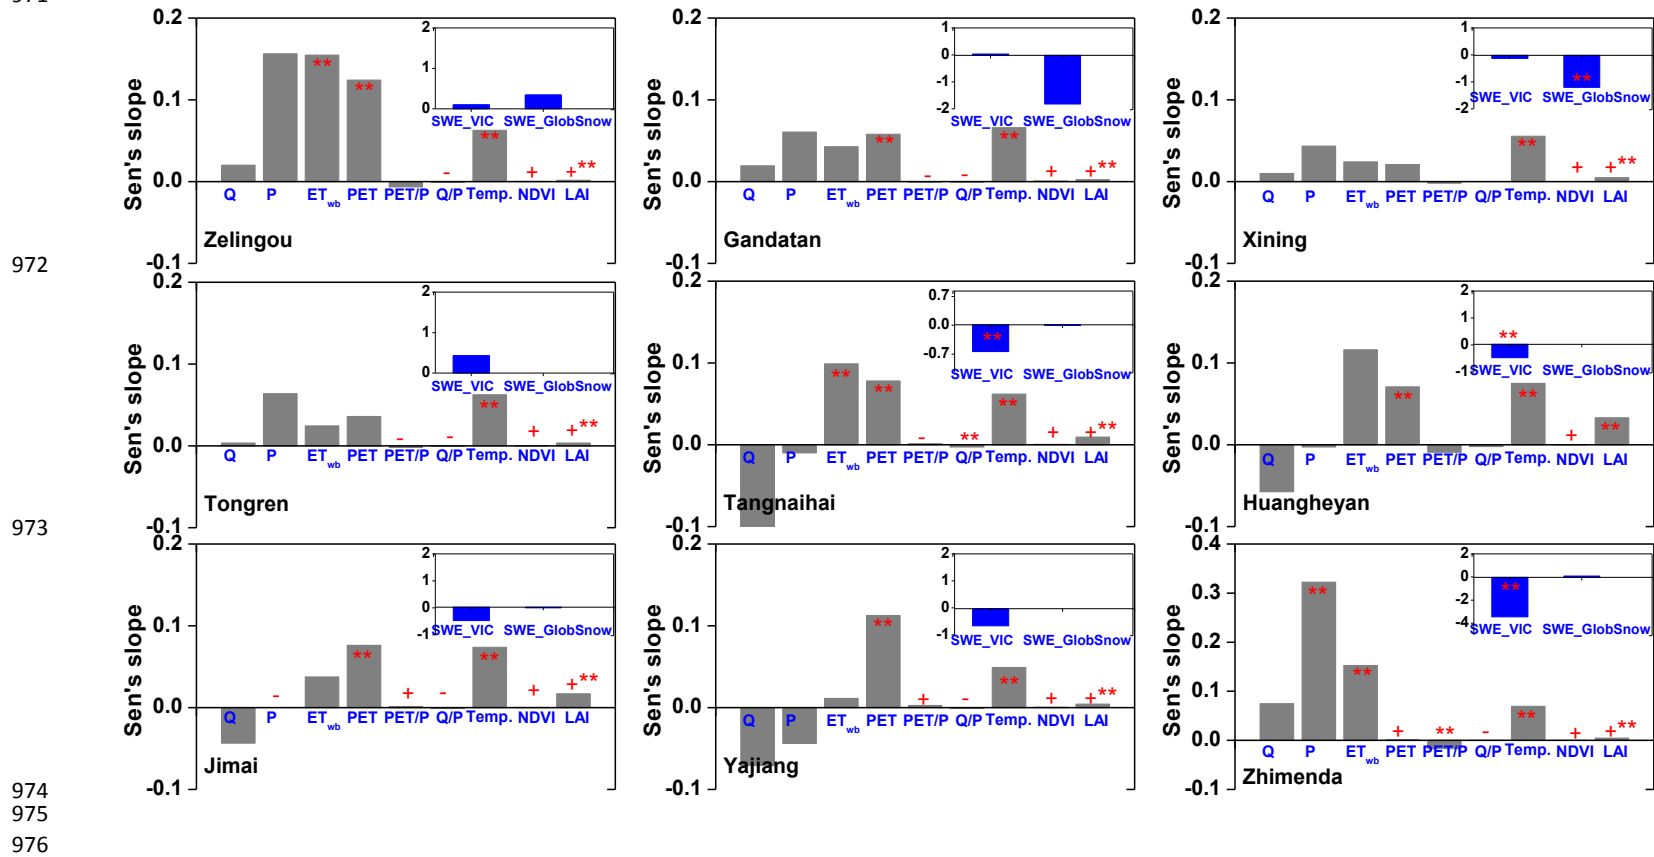

977 **Figure 11.** Similar to Figure 8 but for Indian monsoon-dominated TP basins. It should be noted that the GlobSnow data are not available for some basins. The  
 978 double red stars showed that the trend was statistically significant at the 0.05 level.  
 979

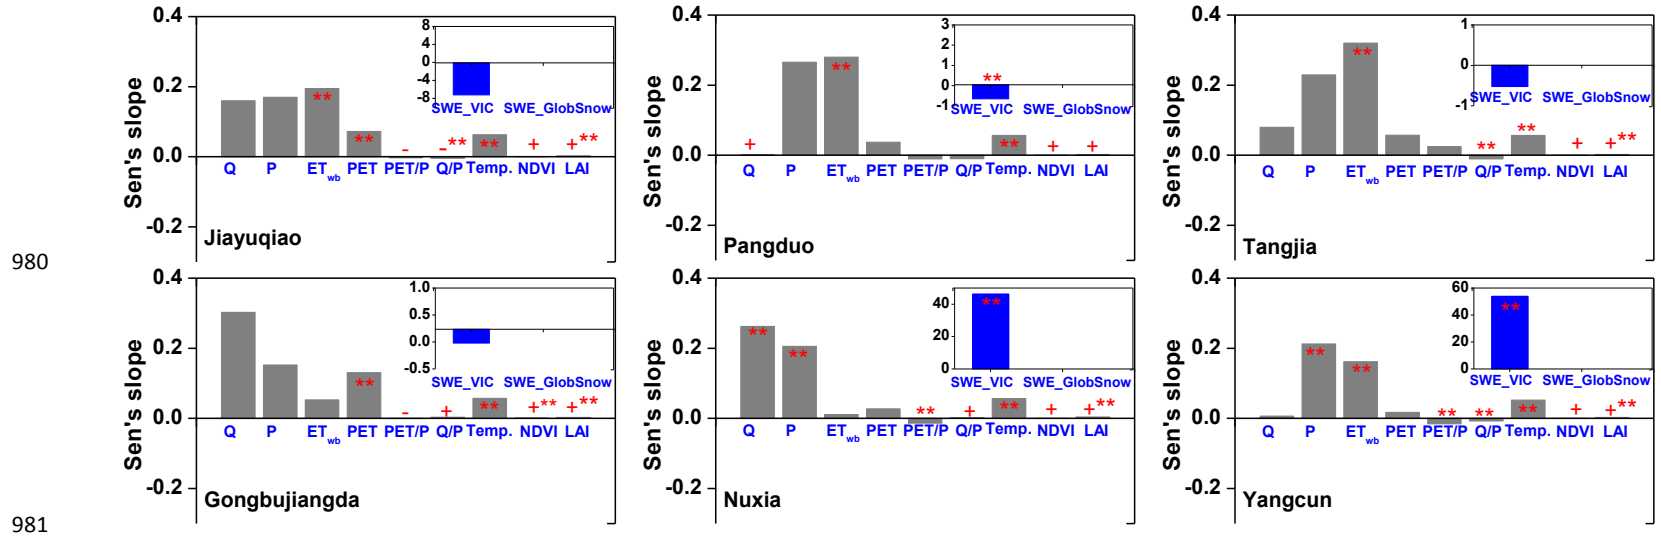

981
